# Supplementary material for: Construction of biomass-based amines via Ir-mediated N-alkylation: kinetic analysis
Source: Royal Society of Chemistry journal article supplement (doi:10.1039/d3gc04747d), 2024-01-01
Supplement: d3gc04747d1.pdf [file d3gc04747d1.pdf]

## Electronic Supplementary Information

### Construction of Biomass-Based Amines by Ir-Mediated *N*-Alkylation: Kinetic Analysis

Meixiang Liang,<sup>a</sup> Zhongmou Xu,<sup>a</sup> Tianhao Zhou,<sup>a</sup> Limin Chen,<sup>b,\*</sup> and Jinzhu Chen<sup>a,\*</sup>

<sup>a</sup>College of Chemistry and Materials Science, Jinan University, Guangzhou 511443, China.

<sup>b</sup>School of Environment and Energy, South China University of Technology, Guangzhou 510006, China.

\*Corresponding author, E-mail address: [liminchen@scut.edu.cn](mailto:liminchen@scut.edu.cn) (L. Chen), [chenjz@jnu.edu.cn](mailto:chenjz@jnu.edu.cn) (J. Chen),  
Tel.: (+86)-20-3733-1547 (J. Chen), Fax: (+86)-20-3733-1547 (J. Chen).

Total number of pages: 49

Total number of Tables: 21 (pages S5-S19)

Total number of Schemes: 3 (pages S20-S23)

Total number of Figures: 25 (pages S24-S48)

## Table of contents

### S1. Experimental procedures

#### S1.1. Materials

#### S1.2. Preparation of catalyst

#### S1.3. Catalyst characterization

### S2. Results and discussion

#### S2.1. Supplementary Tables

**Table S1.** Reported Ir catalysts for *N*-alkylation amines with alcohols.

**Table S2.** The calculated data from Fig. 6d for linear fitting of  $k'_1$  (at 130 °C) in Fig. 7a.

**Table S3.** The calculated data from Fig. 6c for linear fitting of  $k'_1$  (at 140 °C) in Fig. 7a.

**Table S4.** The calculated data from Fig. 6b for linear fitting of  $k'_1$  (at 150 °C) in Fig. 7a.

**Table S5.** The calculated data from Fig. 6a for linear fitting of  $k'_1$  (at 160 °C) in Fig. 7a.

**Table S6.** The calculated data from Fig. 6d for linear fitting of  $k'_3$  (at 130 °C) in Fig. 7b.

**Table S7.** The calculated data from Fig. 6c for linear fitting of  $k'_3$  (at 140 °C) in Fig. 7b.

**Table S8.** The calculated data from Fig. 6b for linear fitting of  $k'_3$  (at 150 °C) in Fig. 7b.

**Table S9.** The calculated data from Fig. 6a for linear fitting of  $k'_3$  (at 160 °C) in Fig. 7b.

**Table S10.** The calculated data from Fig. 6d for linear fitting of  $k'_{-3}$  (at 130 °C) in Fig. 7c.

**Table S11.** The calculated data from Fig. 6c for linear fitting of  $k'_{-3}$  (at 140 °C) in Fig. 7c.

**Table S12.** The calculated data from Fig. 6b for linear fitting of  $k'_{-3}$  (at 150 °C) in Fig. 7c.

**Table S13.** The calculated data from Fig. 6a for linear fitting of  $k'_{-3}$  (at 160 °C) in Fig. 7c.

**Table S14.** The calculated data from Fig. 9d for linear fitting of  $k''_1$  (at 110 °C) in Fig. 10a.

**Table S15.** The calculated data from Fig. 9c for linear fitting of  $k''_1$  (at 120 °C) in Fig. 10a.

**Table S16.** The calculated data from Fig. 9b for linear fitting of  $k''_1$  (at 130 °C) in Fig. 10a.

**Table S17.** The calculated data from Fig. 9a for linear fitting of  $k''_1$  (at 140 °C) in Fig. 10a.

**Table S18.** The calculated data from Fig. 9d for linear fitting of  $k''_3$  (at 110 °C) in Fig. 10b.

**Table S19.** The calculated data from Fig. 9c for linear fitting of  $k''_3$  (at 120 °C) in Fig. 10b.

**Table S20.** The calculated data from Fig. 9b for linear fitting of  $k''_3$  (at 130 °C) in Fig. 10b.

**Table S21.** The calculated data from Fig. 9a for linear fitting of  $k''_3$  (at 140 °C) in Fig. 10b.

#### S2.2. Supplementary Schemes and Figures.

**Scheme S1.** Synthetic route to CTF-3 and CTF-4.

**Scheme S2.** Control experiments.

**Scheme S3.** Kinetic equations for **1a/2a**-to-**5a** *N*-alkylation

**Fig. S1.** (a) IR spectra of **12** and **13**. CTF and Ir/CTF serial samples; (b) IR spectra, (c) TGA plots. CTF-2 and 1.8%-Ir/CTF-2; (d) N 1s XPS, (e) Cl 2p XPS. (f) Nitrogen sorption isotherms of fresh and recovered 1.8%-Ir/CTF-1.

**Fig. S2.** Nonlinear fittings of concentration–time curves at the specified reaction-time intervals (corresponding to Fig. 6 and Tables S2–13): (a) **[2a]**~*t*, (b) **[4a]**~*t*, (c) **[5a]**~*t*.

**Fig. S3.** The concentration–time curves at the specified reaction-time intervals: (a) **[2a]**~*t*, (b) **[4a]**~*t*, (c) **[5a]**~*t*. And plots of: (d)  $r_{2a}$  against **[2a]**, (e)  $r_{4a}$  against **[4a]**, (f)  $r_{5a}$  against **[5a]**.

**Fig. S4.** Nonlinear fittings of concentration–time curves at the specified reaction-time intervals (corresponding to Fig. 9 and Tables S14–21): (a) **[2a]**~*t*, (b) **[4a]**~*t*, (c) **[5a]**~*t*.

**Fig. S5.**  $^1\text{H}$  and  $^{13}\text{C}$   $\{^1\text{H}\}$  NMR of *N*-[(tetrahydro-2-furanyl)methyl]-2-furanmethanamine **5a**.

**Fig. S6.**  $^1\text{H}$  and  $^{13}\text{C}$   $\{^1\text{H}\}$  NMR of 5-Methyl-*N*-[(tetrahydro-2-furanyl)methyl]-2-furanmethanamine

**5b.**

**Fig. S7.**  $^1\text{H}$  and  $^{13}\text{C}$   $\{^1\text{H}\}$  NMR of tetrahydro-*N*-[(4-methoxyphenyl)methyl]-2-furanmethanamine **5c**.

**Fig. S8.**  $^1\text{H}$  and  $^{13}\text{C}$   $\{^1\text{H}\}$  NMR of tetrahydro-*N*-[(3,4,5-trimethoxyphenyl)methyl]-2-furanmethanamine **5d**.

**Fig. S9.**  $^1\text{H}$  and  $^{13}\text{C}$   $\{^1\text{H}\}$  NMR of 3-phenyl-*N*-((2-tetrahydrofuranyl)methyl)propan-1-amine **5e**.

**Fig. S10.**  $^1\text{H}$  and  $^{13}\text{C}$   $\{^1\text{H}\}$  NMR of *N*-ethyltetrahydro-2-furanmethanamine **5f**.

**Fig. S11.**  $^1\text{H}$  and  $^{13}\text{C}$   $\{^1\text{H}\}$  NMR of *N*-butyltetrahydro-2-furanmethanamine **5g**.

**Fig. S12.**  $^1\text{H}$  and  $^{13}\text{C}$   $\{^1\text{H}\}$  NMR of tetrahydro-*N*-(phenylmethyl)-2-furanmethanamine **5h**.

**Fig. S13.**  $^1\text{H}$  and  $^{13}\text{C}$   $\{^1\text{H}\}$  NMR of *N*-[(4-fluorophenyl)methyl]tetrahydro-2-furanmethanamine **5i**.

**Fig. S14.**  $^1\text{H}$  and  $^{13}\text{C}$   $\{^1\text{H}\}$  NMR of *N*-[(4-chlorophenyl)methyl]tetrahydro-2-furanmethanamine **5j**.

**Fig. S15.**  $^1\text{H}$  and  $^{13}\text{C}$   $\{^1\text{H}\}$  NMR of *N*-[(4-bromophenyl)methyl]tetrahydro-2-furanmethanamine **5k**.

**Fig. S16.**  $^1\text{H}$  and  $^{13}\text{C}$   $\{^1\text{H}\}$  NMR of *N*-[(tetrahydro-2-furanyl)methyl]-3-pyridinemethanamine **5l**.

**Fig. S17.**  $^1\text{H}$  and  $^{13}\text{C}$   $\{^1\text{H}\}$  NMR of *N*-(2-furanylmethyl)-2-furanmethanamine **5m**.

**Fig. S18.**  $^1\text{H}$  and  $^{13}\text{C}$   $\{^1\text{H}\}$  NMR of *N*-(2-furanylmethyl)-5-methyl-2-furanmethanamine **5n**.

**Fig. S19.**  $^1\text{H}$  and  $^{13}\text{C}$   $\{^1\text{H}\}$  NMR of *N*-[(4-methoxyphenyl)methyl]-2-furanmethanamine **5o**.

**Fig. S20.**  $^1\text{H}$  and  $^{13}\text{C}$   $\{^1\text{H}\}$  NMR of *N*-[(3,4,5-trimethoxyphenyl)methyl]-2-furanmethanamine **5p**.

**Fig. S21.**  $^1\text{H}$  and  $^{13}\text{C}$   $\{^1\text{H}\}$  NMR of *N*-(3-phenylpropyl)-2-furanmethanamine **5q**.

**Fig. S22.**  $^1\text{H}$  and  $^{13}\text{C}$   $\{^1\text{H}\}$  NMR of *N*-(2-furanylmethyl)-3-pyridinemethanamine **5r**.

**Fig. S23.**  $^1\text{H}$  and  $^{13}\text{C}$   $\{^1\text{H}\}$  NMR of *N*-[(4-fluorophenyl)methyl]-2-furanmethanamine **5s**.

**Fig. S24.**  $^1\text{H}$  and  $^{13}\text{C}$   $\{^1\text{H}\}$  NMR of *N*-[(4-chlorophenyl)methyl]-2-furanmethanamine **5t**.

**Fig. S25.**  $^1\text{H}$  and  $^{13}\text{C}$   $\{^1\text{H}\}$  NMR of *N*-[(4-bromophenyl)methyl]-2-furanmethanamine **5u**.

**S3. References**

## S1. Experimental procedures

### S1.1. Materials

Unless otherwise stated, all chemicals in this work were commercially available and used without further purification. 3-Aminobenzonitrile, furfuryl alcohol, sodium formate (HCOONa) were purchased from Aladdin Reagent (Shanghai, P.R. China). Dichloromethane, tetrahydrofuran (THF), acetonitrile and ethanol were purchased from Kutai Trade Co. Ltd. (Guangzhou P.R. China). Toluene and acetone were purchased from Xinhong Trading Co. Ltd. (Guangzhou P.R. China). Dichloro(pentamethylcyclopentadienyl)iridium(III) dime, 4-aminobenzonitrile, 2,6-pyridinedicarbonitrile, 5-methyl-2-furanmethanol, (4-methoxyphenyl)methanol, 3,4,5-trimethoxybenzalcohol, cinnamyl alcohol, 1-butanol, benzyl alcohol, (4-fluorophenyl)methanol, (4-chlorophenyl)methanol, (4-bromophenyl)methanol, pyridin-3-ylmethanol, (4-methoxyphenyl)methanamine, (3,4,5-trimethoxyphenyl)methanamine, 4-fluorobenzylamine, 4-chlorobenzylamine, 4-bromobenzylamine were purchased from Bide Pharmaceutical Technology Co. Ltd. (Shanghai, P.R. China). ZnCl<sub>2</sub>, 2-furfurylamine, 5-methyl-2-furanmethanamine were purchased from Macklin Reagent (Shanghai, P.R. China). Tetrahydrofurfurylamine was purchased from Energy Chemical (Anhui, P.R. China). Paragormaldehyde was purchased from Damao Chemical Reagent Factory (Tianjin, P.R. China). High purity gases including H<sub>2</sub> (≥99.999%), N<sub>2</sub> (≥99.999%), dry air and liquid nitrogen were purchased from Guangzhou Shengying Gas Co. Ltd. (Guangzhou, P.R. China).

### S1.2. Preparation of catalyst

**Synthesis of compound 12 (Scheme S1):** To a stirred solution of paraformaldehyde (0.98 g, 33 mmol) in toluene (50 mL) was added 4-aminobenzonitrile (7.72 g, 65.2 mmol) and aqueous glyoxal [40% (v/v), 4.74 g, 32.6 mmol] followed by the dropwise addition of HCl [37% (v/v), 3.72 mL, 32.6 mmol]. The mixture was refluxed until ca. 6.5 mL of water was recovered via a Dean-Stark apparatus. The solvent was removed in vacuum and the resulting oil was triturated with acetonitrile to yield a pale-brown powder (4.01 g).<sup>1</sup>

**Synthesis of compound 13 (Scheme S1):** **13** (4.01 g) was prepared with the same synthetic procedure of **12**, except that 4-aminobenzonitrile (7.72 g, 65.2 mmol) was replaced by 3-aminobenzonitrile (7.72 g, 65.2 mmol) as nitrile-source.

The substrate conversions and produce yields in the *N*-alkylation were calculated using the following equation:

$$\text{Conversion (\%)} = \frac{\text{mole of substrate consumed}}{\text{mole of initial substrate}} \times 100\%$$

$$\text{Yield (\%)} = \frac{\text{mole of product formed}}{\text{mole of initial substrate}} \times 100\%$$

### S1.3. Catalyst characterization

X-ray photoelectron spectra (XPS) and Auger electron spectroscopy were made on a Thermal Fisher system employing an Al K $\alpha$  radiation source. The binding energies for each spectrum were calibrated with a C 1s spectrum of 284.5 eV.

The morphological analysis and elemental distribution were carried out by using Transmission Electron Microscopy (TEM, Jem 2100F) with an acceleration voltage of 200 kV.

The metal content in catalyst was analyzed with an Optima 2000 DV inductively coupled plasma-

optical emission spectrometer (ICP-OES, Perkin Elmer, USA).

The BET specific surface area measurements were performed with N<sub>2</sub> adsorption-desorption isotherms at liquid-nitrogen temperature (77 K) using automatic volumetric adsorption equipment (Quantachrome Instruments).

The conversion rate of the reactant and the yield of the product were measured by an external standard method with Gas Chromatography (GC). The GC analysis was performed with a Fuli 9790 (Type II) Gas Chromatography from Fuli Instruments, using an FID detector and capillary column (KB-5, 0.32 mm × 30 m) with high purity N<sub>2</sub> as carrier gas for analysis. The pressures of various gases were all 0.1 MPa for N<sub>2</sub>, H<sub>2</sub> and air.

<sup>1</sup>H and <sup>13</sup>C {<sup>1</sup>H} NMR spectra of products were recorded on Bruker AV III 300 at 25 °C.

## S2. Results and discussion

### S2.1. Supplementary Tables

**Table S1** Reported Ir catalysts for *N*-alkylation amines with alcohols.

| Catalyst                                                                                                                                           | Substrate                                                                           | Reaction condition                                                                              | Product<br>Yield [%]                                                                          | Ref.                                                       |
|----------------------------------------------------------------------------------------------------------------------------------------------------|-------------------------------------------------------------------------------------|-------------------------------------------------------------------------------------------------|-----------------------------------------------------------------------------------------------|------------------------------------------------------------|
| 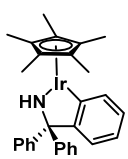<br>3d                                                          |  | 3d (5 mol%), 4f (1 mol%), DMC, 4 Å molecular sieves, 80 °C, 18 h.                               | <br>92   | <i>Angew. Chem. Int. Ed.</i> , 2017, <b>56</b> , 7176–7180 |
| <br>4f<br>R=2,4,6-Cy <sub>3</sub> C <sub>6</sub> H <sub>2</sub> |  | amine (0.5 mmol), alcohol (0.5 mmol), catalyst (1 mol%), H <sub>2</sub> O (1 mL), 110 °C, 48 h. | <br>93.5 | <i>Green Chem.</i> , 2019, <b>21</b> , 219–224             |
| <br>[Ir(COD)Cl] <sub>2</sub>                                    |  | amine (0.5 mmol), alcohol (0.5 mmol), <i>t</i> -BuOK (3.5 mmol), diglyme (2 mL), 120 °C, 4 h.   | <br>92   | <i>Green Chem.</i> , 2017, <b>19</b> , 1109–1116           |

|                                                                                                 |                                                                                     |                                                                                                                                                                              |                                                                                       |                                                          |
|-------------------------------------------------------------------------------------------------|-------------------------------------------------------------------------------------|------------------------------------------------------------------------------------------------------------------------------------------------------------------------------|---------------------------------------------------------------------------------------|----------------------------------------------------------|
| 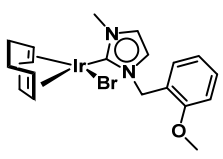               |    | amine (3.0 mmol),<br>alcohol (3.0 mmol),<br>catalyst (0.03 mmol, 1 mol%), <i>t</i> -BuOK (1.5 mmol), toluene (0.3 mL), 110 °C, 5 h.                                          |    | <i>Catal. Sci. Technol.</i> , 2018, <b>8</b> , 2381–2393 |
|                |    | amine (0.5 mmol),<br>alcohol (1.0 mmol),<br>K <sub>2</sub> CO <sub>3</sub> (1 mmol),<br>catalyst (1 mol%), TFE (2.6 mL), 100 °C, 7 h.                                        |    | <i>Appl. Organomet. Chem.</i> , 2020, <b>34</b> , e6003  |
|                |    | amine (1 mmol), benzyl alcohol (1 mmol),<br>catalyst (2 mol%), water (0.25 mL), 110 °C, 16 h.                                                                                |    | <i>ChemCatChem</i> , 2017, <b>9</b> , 3912–3917          |
| [Ir(dpyx- <i>N,C,N</i> )Cl(μ-Cl)] <sub>2</sub><br>(dpyx: 1,3-di(2-pyridyl)-4,6-dimethylbenzene) |   | amine (0.5 mmol),<br>benzyl alcohol (0.6 mmol), catalyst (1 mol% Ir), Cs <sub>2</sub> CO <sub>3</sub> (0.1 mmol), <i>tert</i> -amyl alcohol (1 mL), reflux, under air, 12 h. |   | <i>J. Org. Chem.</i> , 2017, <b>82</b> , 1943–1950       |
|              |  | amine (0.5 mmol),<br>alcohol (0.5 mmol),<br>catalyst (1 mol%), <i>t</i> -BuOK (0.25 mmol), toluene (50 μL), 110 °C, 16 h.                                                    |  | <i>Appl. Organomet. Chem.</i> , 2020, <b>34</b> , e5970  |
|              |  | amine (1.0 mmol),<br>alcohol (1.0 mmol),<br>catalyst (1 mol%),<br>NaHCO <sub>3</sub> (0.5 mmol), 4 Å molecular sieves, toluene (0.2 mL), 110 °C, 45 h.                       |  | <i>Organometallics</i> , 2009, <b>28</b> , 321–325       |
| Zr-[Llr]BF <sub>4</sub>                                                                         |  | amine (1.0 mmol),<br>alcohol (40 mL), catalyst (0.20 mol% Ir), 150 °C, 2.5 h, microwave reactor.                                                                             |  | <i>ChemCatChem</i> , 2014, <b>6</b> , 1794–1800          |
|              |  | amine (1.0 mmol),<br>alcohol (1.0 mmol),<br>catalyst (1 mol% Ir),<br>toluene (0.5 mL), 110 °C, 2 h.                                                                          |  | <i>Chem. Eur. J.</i> , 2012, <b>18</b> , 14510–14519     |

|                                                                                    |                                                                                     |                                                                                                                                                                                                     |                                                                                       |                                                               |
|------------------------------------------------------------------------------------|-------------------------------------------------------------------------------------|-----------------------------------------------------------------------------------------------------------------------------------------------------------------------------------------------------|---------------------------------------------------------------------------------------|---------------------------------------------------------------|
| 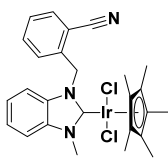  |    | amine (1.0 mmol),<br>alcohol (1.5 mmol),<br>catalyst (1.0 mol%), <i>t</i> -BuOK (1.5 mmol),<br>120 °C, 24 h.                                                                                        |    | <i>ACS Omega</i> , 2023,<br><b>8</b> , 5332–5348              |
| [Ir(cod)Cl] <sub>2</sub><br>Py <sub>2</sub> NPiPr <sub>2</sub>                     |    | amine (1.0 mmol),<br>alcohol (1.1 mmol),<br>[IrCl(cod)] <sub>2</sub> (0.05 mol%),<br>Py <sub>2</sub> NPiPr <sub>2</sub> (0.1 mol%), <i>t</i> -BuOK (1.1 mmol),<br>diglyme (0.2 mL), 70 °C,<br>24 h. |    | <i>Chem. Eur. J.</i> ,<br>2009, <b>15</b> , 3790–<br>3799     |
|   |    | amine (1.0 mmol),<br>alcohol (1.1 mmol),<br>catalyst (0.5 mol%), <i>t</i> -BuOK (1.1 mmol),<br>toluene-d <sub>8</sub> , 100 °C, 6 h.                                                                |    | <i>Green Chem.</i> ,<br>2017, <b>19</b> , 3142–<br>3151       |
|  |   | amine (1.0 mmol),<br>alcohol (1.0 mmol),<br>catalyst (2 mol%),<br>toluene (0.3 mL), 95 °C,<br>24 h.                                                                                                 |    | <i>Org. Lett.</i> , 2013,<br><b>15</b> , 266–269              |
| [Cp*IrCl <sub>2</sub> ] <sub>2</sub>                                               |  | amine (3.0 mmol), diol<br>(2.0 mmol), [Cp*IrCl <sub>2</sub> ] <sub>2</sub><br>(0.01 mmol, 1.0 % Ir),<br>NaHCO <sub>3</sub> (0.02 mmol),<br>toluene (1 mL), 90 °C, 17<br>h.                          |  | <i>Org. Lett.</i> , 2004, <b>6</b> ,<br>3525–3528             |
| [Cp*IrCl <sub>2</sub> ] <sub>2</sub>                                               |  | aniline (1.0 mmol),<br>benzyl alcohol (1.0<br>mmol), catalyst (5.0<br>mol% Ir), K <sub>2</sub> CO <sub>3</sub> (0.050<br>mmol), toluene (0.5 mL),<br>110 °C, 17 h.                                  |  | <i>Tetrahedron Lett.</i> ,<br>2003, <b>44</b> , 2687–<br>2690 |
| [Cp*IrCl <sub>2</sub> ] <sub>2</sub>                                               |  | amine (1.0 mmol),<br>alcohol (1.0 mmol),<br>[Cp*IrCl <sub>2</sub> ] <sub>2</sub> (0.005 mmol,<br>1.0 mol% Ir), NaHCO <sub>3</sub><br>(0.01 mmol), toluene (0.1<br>mL), 110 °C, 17 h.                |  | <i>Tetrahedron</i> , 2008,<br><b>64</b> , 1943–1954           |

**Table S2** The calculated data from Fig. 6d for linear fitting of  $k'_1$  (at 130 °C) in Fig. 7a.

| $t_1 \rightarrow t_2$<br>[h] | $[\mathbf{2a}]_{t_1} \times 10^3$<br>[M] | $[\mathbf{2a}]_{t_2} \times 10^3$<br>[M] | $[\ln([\mathbf{2a}]_{t_1}/[\mathbf{2a}]_{t_2})]$<br>/ | $t_2 - t_1$<br>[h] |
|------------------------------|------------------------------------------|------------------------------------------|-------------------------------------------------------|--------------------|
| 20.00→20.60                  | 13.99214                                 | 13.4774                                  | 0.03748                                               | 0.70               |
| 20.00→21.20                  | 13.99214                                 | 12.98963                                 | 0.07434                                               | 1.40               |
| 20.00→21.80                  | 13.99214                                 | 12.52742                                 | 0.11058                                               | 2.10               |
| 20.00→22.40                  | 13.99214                                 | 12.08942                                 | 0.14617                                               | 2.80               |
| 20.00→23.00                  | 13.99214                                 | 11.67436                                 | 0.1811                                                | 3.50               |
| 20.00→23.60                  | 13.99214                                 | 11.28105                                 | 0.21537                                               | 4.20               |
| 20.00→24.20                  | 13.99214                                 | 10.90835                                 | 0.24897                                               | 4.90               |
| 20.00→24.80                  | 13.99214                                 | 10.55517                                 | 0.28188                                               | 5.60               |
| 20.00→25.40                  | 13.99214                                 | 10.22049                                 | 0.3141                                                | 6.30               |
| 20.00→26.00                  | 13.99214                                 | 9.90335                                  | 0.34562                                               | 7.00               |
| 20.00→26.60                  | 13.99214                                 | 9.60282                                  | 0.37644                                               | 7.70               |
| 20.00→27.20                  | 13.99214                                 | 9.31803                                  | 0.40654                                               | 8.40               |
| 20.00→27.80                  | 13.99214                                 | 9.04817                                  | 0.43593                                               | 9.10               |
| 20.00→28.40                  | 13.99214                                 | 8.79244                                  | 0.4646                                                | 9.80               |
| 20.00→29.00                  | 13.99214                                 | 8.55011                                  | 0.49255                                               | 10.50              |
| 20.00→29.60                  | 13.99214                                 | 8.32048                                  | 0.51978                                               | 11.20              |
| 20.00→30.20                  | 13.99214                                 | 8.10287                                  | 0.54628                                               | 11.90              |
| 20.00→30.80                  | 13.99214                                 | 7.89667                                  | 0.57205                                               | 12.60              |
| 20.00→31.40                  | 13.99214                                 | 7.70127                                  | 0.59711                                               | 13.30              |
| 20.00→32.00                  | 13.99214                                 | 7.51611                                  | 0.62145                                               | 14.00              |

**Table S3** The calculated data from Fig. 6c for linear fitting of  $k'_1$  (at 140 °C) in Fig. 7a.

| $t_1 \rightarrow t_2$<br>[h] | $[\mathbf{2a}]_{t_1} \times 10^3$<br>[M] | $[\mathbf{2a}]_{t_2} \times 10^3$<br>[M] | $[\ln([\mathbf{2a}]_{t_1}/[\mathbf{2a}]_{t_2})]$<br>/ | $t_2 - t_1$<br>[h] |
|------------------------------|------------------------------------------|------------------------------------------|-------------------------------------------------------|--------------------|
| 7.0→7.25                     | 26.92684                                 | 26.47033                                 | 0.0171                                                | 0.25               |
| 7.0→7.50                     | 26.92684                                 | 26.02095                                 | 0.03422                                               | 0.50               |
| 7.0→7.75                     | 26.92684                                 | 25.5786                                  | 0.05137                                               | 0.75               |
| 7.0→8.00                     | 26.92684                                 | 25.14317                                 | 0.06854                                               | 1.00               |
| 7.0→8.25                     | 26.92684                                 | 24.71455                                 | 0.08573                                               | 1.25               |
| 7.0→8.50                     | 26.92684                                 | 24.29264                                 | 0.10295                                               | 1.50               |
| 7.0→8.75                     | 26.92684                                 | 23.87732                                 | 0.12019                                               | 1.75               |
| 7.0→9.00                     | 26.92684                                 | 23.4685                                  | 0.13746                                               | 2.00               |
| 7.0→9.25                     | 26.92684                                 | 23.06607                                 | 0.15476                                               | 2.25               |
| 7.0→9.50                     | 26.92684                                 | 22.66993                                 | 0.17208                                               | 2.50               |
| 7.0→9.75                     | 26.92684                                 | 22.27999                                 | 0.18943                                               | 2.75               |
| 7.0→10.00                    | 26.92684                                 | 21.89615                                 | 0.20681                                               | 3.00               |
| 7.0→10.25                    | 26.92684                                 | 21.51832                                 | 0.22422                                               | 3.25               |
| 7.0→10.50                    | 26.92684                                 | 21.14639                                 | 0.24165                                               | 3.50               |
| 7.0→10.75                    | 26.92684                                 | 20.78028                                 | 0.25912                                               | 3.75               |
| 7.0→11.00                    | 26.92684                                 | 20.41989                                 | 0.27661                                               | 4.00               |
| 7.0→11.25                    | 26.92684                                 | 20.06514                                 | 0.29414                                               | 4.25               |
| 7.0→11.50                    | 26.92684                                 | 19.71594                                 | 0.3117                                                | 4.50               |
| 7.0→11.75                    | 26.92684                                 | 19.3722                                  | 0.32928                                               | 4.75               |
| 7.0→12.00                    | 26.92684                                 | 19.03383                                 | 0.34691                                               | 5.00               |



**Table S4** The calculated data from Fig. 6b for linear fitting of  $k'_1$  (at 150 °C) in Fig. 7a.

| $t_1 \rightarrow t_2$<br>[h] | $[\mathbf{2a}]_{t_1} \times 10^3$<br>[M] | $[\mathbf{2a}]_{t_2} \times 10^3$<br>[M] | $[\ln([\mathbf{2a}]_{t_1}/[\mathbf{2a}]_{t_2})]$<br>/ | $t_2 - t_1$<br>[h] |
|------------------------------|------------------------------------------|------------------------------------------|-------------------------------------------------------|--------------------|
| 8.00→8.40                    | 23.56355                                 | 22.83776                                 | 0.03129                                               | 0.40               |
| 8.00→8.80                    | 23.56355                                 | 22.12011                                 | 0.06321                                               | 0.80               |
| 8.00→9.20                    | 23.56355                                 | 21.41052                                 | 0.09582                                               | 1.20               |
| 8.00→9.60                    | 23.56355                                 | 20.70889                                 | 0.12914                                               | 1.60               |
| 8.00→10.00                   | 23.56355                                 | 20.01513                                 | 0.16321                                               | 2.00               |
| 8.00→10.40                   | 23.56355                                 | 19.32916                                 | 0.19809                                               | 2.40               |
| 8.00→10.80                   | 23.56355                                 | 18.65088                                 | 0.23381                                               | 2.80               |
| 8.00→11.20                   | 23.56355                                 | 17.98022                                 | 0.27043                                               | 3.20               |
| 8.00→11.60                   | 23.56355                                 | 17.31708                                 | 0.30801                                               | 3.60               |
| 8.00→12.00                   | 23.56355                                 | 16.66138                                 | 0.34661                                               | 4.00               |
| 8.00→12.40                   | 23.56355                                 | 16.01304                                 | 0.3863                                                | 4.40               |
| 8.00→12.80                   | 23.56355                                 | 15.37198                                 | 0.42715                                               | 4.80               |
| 8.00→13.20                   | 23.56355                                 | 14.73811                                 | 0.46926                                               | 5.20               |
| 8.00→13.60                   | 23.56355                                 | 14.11135                                 | 0.51272                                               | 5.60               |
| 8.00→14.00                   | 23.56355                                 | 13.49162                                 | 0.55763                                               | 6.00               |
| 8.00→14.40                   | 23.56355                                 | 12.87885                                 | 0.60411                                               | 6.40               |
| 8.00→14.80                   | 23.56355                                 | 12.27295                                 | 0.6523                                                | 6.80               |
| 8.00→15.20                   | 23.56355                                 | 11.67386                                 | 0.70235                                               | 7.20               |
| 8.00→15.60                   | 23.56355                                 | 11.08148                                 | 0.75443                                               | 7.60               |
| 8.00→16.00                   | 23.56355                                 | 10.49576                                 | 0.80873                                               | 8.00               |

**Table S5** The calculated data from Fig. 6a for linear fitting of  $k'_1$  (at 160 °C) in Fig. 7a.

| $t_1 \rightarrow t_2$<br>[h] | $[\mathbf{2a}]_{t_1} \times 10^3$<br>[M] | $[\mathbf{2a}]_{t_2} \times 10^3$<br>[M] | $[\ln([\mathbf{2a}]_{t_1}/[\mathbf{2a}]_{t_2})]$<br>/ | $t_2 - t_1$<br>[h] |
|------------------------------|------------------------------------------|------------------------------------------|-------------------------------------------------------|--------------------|
| 11.00→11.25                  | 14.46597                                 | 13.97607                                 | 0.03445                                               | 0.25               |
| 11.00→11.50                  | 14.46597                                 | 13.50081                                 | 0.06905                                               | 0.50               |
| 11.00→11.75                  | 14.46597                                 | 13.03976                                 | 0.1038                                                | 0.75               |
| 11.00→12.00                  | 14.46597                                 | 12.59248                                 | 0.1387                                                | 1.00               |
| 11.00→12.25                  | 14.46597                                 | 12.15857                                 | 0.17376                                               | 1.25               |
| 11.00→12.50                  | 14.46597                                 | 11.73762                                 | 0.209                                                 | 1.50               |
| 11.00→12.75                  | 14.46597                                 | 11.32925                                 | 0.24441                                               | 1.75               |
| 11.00→13.00                  | 14.46597                                 | 10.93309                                 | 0.28                                                  | 2.00               |
| 11.00→13.25                  | 14.46597                                 | 10.54876                                 | 0.31579                                               | 2.25               |
| 11.00→13.50                  | 14.46597                                 | 10.17592                                 | 0.35177                                               | 2.50               |
| 11.00→13.75                  | 14.46597                                 | 9.81422                                  | 0.38797                                               | 2.75               |
| 11.00→14.00                  | 14.46597                                 | 9.46332                                  | 0.42438                                               | 3.00               |
| 11.00→14.25                  | 14.46597                                 | 9.12291                                  | 0.46101                                               | 3.25               |
| 11.00→14.50                  | 14.46597                                 | 8.79268                                  | 0.49788                                               | 3.50               |
| 11.00→14.75                  | 14.46597                                 | 8.47231                                  | 0.535                                                 | 3.75               |
| 11.00→15.00                  | 14.46597                                 | 8.16151                                  | 0.57237                                               | 4.00               |
| 11.00→15.25                  | 14.46597                                 | 7.86                                     | 0.61001                                               | 4.25               |
| 11.00→15.5                   | 14.46597                                 | 7.5675                                   | 0.64794                                               | 4.50               |
| 11.00→15.75                  | 14.46597                                 | 7.28374                                  | 0.68615                                               | 4.75               |
| 11.00→16.00                  | 14.46597                                 | 7.00847                                  | 0.72468                                               | 5.00               |

**Table S6** The calculated data from Fig. 6d for linear fitting of  $k'_3$  (at 130 °C) in Fig. 7b.

| $t_1 \rightarrow t_2$ | $t_1 \rightarrow t_3$ | $[5a]_{t_1} \times 10^3$ | $[5a]_{t_2} \times 10^3$ | $[5a]_{t_3} \times 10^3$ | $([5a]_{t_2} - [5a]_{t_1}) \times 10^3$ | $([5a]_{t_3} - [5a]_{t_1}) \times 10^3$ | $5a_{t_1 \rightarrow t_2} \times 10^3$ | $5a_{t_1 \rightarrow t_3} \times 10^3$ | $4a_{t_1 \rightarrow t_2} \times 10^3$ | $4a_{t_1 \rightarrow t_3} \times 10^3$ | H                  | I                                |
|-----------------------|-----------------------|--------------------------|--------------------------|--------------------------|-----------------------------------------|-----------------------------------------|----------------------------------------|----------------------------------------|----------------------------------------|----------------------------------------|--------------------|----------------------------------|
| [h]                   | [h]                   | [M]                      | [M]                      | [M]                      | [M]                                     | [M]                                     | [M h]                                  | [M h]                                  | [M h]                                  | [M h]                                  | [M <sup>2</sup> h] | [M <sup>2</sup> h <sup>2</sup> ] |
| 10.00→10.30           | 10.00→10.60           | 13.69727                 | 14.28874                 | 14.86754                 | 0.59146                                 | 1.17027                                 | 4.1979                                 | 8.57134                                | 3.97378                                | 7.88415                                | 0.15698            | 0.96371                          |
| 10.00→10.60           | 10.00→10.90           | 13.69727                 | 14.86754                 | 15.43395                 | 1.17027                                 | 1.73668                                 | 8.57134                                | 13.11657                               | 7.88415                                | 11.73117                               | 0.46421            | 2.86116                          |
| 10.00→10.90           | 10.00→11.20           | 13.69727                 | 15.43395                 | 15.98824                 | 1.73668                                 | 2.29097                                 | 13.11657                               | 17.8299                                | 11.73117                               | 15.51486                               | 0.91519            | 5.66381                          |
| 10.00→11.20           | 10.00→11.50           | 13.69727                 | 15.98824                 | 16.53066                 | 2.29097                                 | 2.83339                                 | 17.8299                                | 22.70773                               | 15.51486                               | 19.23526                               | 1.50362            | 9.34447                          |
| 10.00→11.50           | 10.00→11.80           | 13.69727                 | 16.53066                 | 17.06148                 | 2.83339                                 | 3.3642                                  | 22.70773                               | 27.74655                               | 19.23526                               | 22.89242                               | 2.22342            | 13.87725                         |
| 10.00→11.80           | 10.00→12.10           | 13.69727                 | 17.06148                 | 17.58092                 | 3.3642                                  | 3.88365                                 | 27.74655                               | 32.94291                               | 22.89242                               | 26.48637                               | 3.06869            | 19.2375                          |
| 10.00→12.10           | 10.00→12.40           | 13.69727                 | 17.58092                 | 18.08925                 | 3.88365                                 | 4.39198                                 | 32.94291                               | 38.29344                               | 26.48637                               | 30.01716                               | 4.03373            | 25.40181                         |
| 10.00→12.40           | 10.00→12.70           | 13.69727                 | 18.08925                 | 18.5867                  | 4.39198                                 | 4.88943                                 | 38.29344                               | 43.79483                               | 30.01716                               | 33.48481                               | 5.11302            | 32.3479                          |
| 10.00→12.70           | 10.00→13.00           | 13.69727                 | 18.5867                  | 19.0735                  | 4.88943                                 | 5.37623                                 | 43.79483                               | 49.44386                               | 33.48481                               | 36.88936                               | 6.30123            | 40.05464                         |
| 10.00→13.00           | 10.00→13.30           | 13.69727                 | 19.0735                  | 19.54988                 | 5.37623                                 | 5.8526                                  | 49.44386                               | 55.23737                               | 36.88936                               | 40.23087                               | 7.5932             | 48.50195                         |
| 10.00→13.30           | 10.00→13.60           | 13.69727                 | 19.54988                 | 20.01606                 | 5.8526                                  | 6.31879                                 | 55.23737                               | 61.17226                               | 40.23087                               | 43.50936                               | 8.98395            | 57.6708                          |
| 10.00→13.60           | 10.00→13.90           | 13.69727                 | 20.01606                 | 20.47226                 | 6.31879                                 | 6.77499                                 | 61.17226                               | 67.24551                               | 43.50936                               | 46.72486                               | 10.46865           | 67.54315                         |
| 10.00→13.90           | 10.00→14.20           | 13.69727                 | 20.47226                 | 20.9187                  | 6.77499                                 | 7.22142                                 | 67.24551                               | 73.45415                               | 46.72486                               | 49.87743                               | 12.04265           | 78.10191                         |
| 10.00→14.20           | 10.00→14.50           | 13.69727                 | 20.9187                  | 21.35558                 | 7.22142                                 | 7.6583                                  | 73.45415                               | 79.7953                                | 49.87743                               | 52.9671                                | 13.70144           | 89.33091                         |
| 10.00→14.50           | 10.00→14.80           | 13.69727                 | 21.35558                 | 21.78311                 | 7.6583                                  | 8.08583                                 | 79.7953                                | 86.2661                                | 52.9671                                | 55.99391                               | 15.44067           | 101.21487                        |
| 10.00→14.80           | 10.00→15.10           | 13.69727                 | 21.78311                 | 22.20148                 | 8.08583                                 | 8.50421                                 | 86.2661                                | 92.86379                               | 55.99391                               | 58.95789                               | 17.25613           | 113.73936                        |
| 10.00→15.10           | 10.00→15.40           | 13.69727                 | 22.20148                 | 22.6109                  | 8.50421                                 | 8.91363                                 | 92.86379                               | 99.58564                               | 58.95789                               | 61.85908                               | 19.14377           | 126.89075                        |
| 10.00→15.40           | 10.00→15.70           | 13.69727                 | 22.6109                  | 23.01156                 | 8.91363                                 | 9.31428                                 | 99.58564                               | 106.42901                              | 61.85908                               | 64.69752                               | 21.09966           | 140.6562                         |
| 10.00→15.70           | 10.00→16.00           | 13.69727                 | 23.01156                 | 23.40364                 | 9.31428                                 | 9.70636                                 | 106.42901                              | 113.39129                              | 64.69752                               | 67.47326                               | 23.12002           | 155.02363                        |
| 10.00→16.00           | /                     | /                        | /                        | /                        | /                                       | /                                       | /                                      | /                                      | /                                      | /                                      | /                  | /                                |

**Table S7** The calculated data from Fig. 6c for linear fitting of  $k'_3$  (at 140 °C) in Fig. 7b.

| $t_1 \rightarrow t_2$ | $t_1 \rightarrow t_3$ | $[5a]_{t_1} \times 10^3$ | $[5a]_{t_2} \times 10^3$ | $[5a]_{t_3} \times 10^3$ | $([5a]_{t_2} - [5a]_{t_1}) \times 10^3$ | $([5a]_{t_3} - [5a]_{t_1}) \times 10^3$ | $5a_{t_1 \rightarrow t_2} \times 10^3$ | $5a_{t_1 \rightarrow t_3} \times 10^3$ | $4a_{t_1 \rightarrow t_2} \times 10^3$ | $4a_{t_1 \rightarrow t_3} \times 10^3$ | H                  | I                                |
|-----------------------|-----------------------|--------------------------|--------------------------|--------------------------|-----------------------------------------|-----------------------------------------|----------------------------------------|----------------------------------------|----------------------------------------|----------------------------------------|--------------------|----------------------------------|
| [h]                   | [h]                   | [M]                      | [M]                      | [M]                      | [M]                                     | [M]                                     | [M h]                                  | [M h]                                  | [M h]                                  | [M h]                                  | [M <sup>2</sup> h] | [M <sup>2</sup> h <sup>2</sup> ] |
| 10.0→10.5             | 10.0→11.0             | 17.49043                 | 18.53493                 | 19.55427                 | 1.0445                                  | 2.06384                                 | 9.00634                                | 18.52864                               | 5.17661                                | 10.23052                               | 0.76558            | 3.77591                          |
| 10.0→11.0             | 10.0→11.5             | 17.49043                 | 19.55427                 | 20.54904                 | 2.06384                                 | 3.05862                                 | 18.52864                               | 28.55446                               | 10.23052                               | 15.16768                               | 2.25985            | 11.09075                         |
| 10.0→11.5             | 10.0→12.0             | 17.49043                 | 20.54904                 | 21.51985                 | 3.05862                                 | 4.02943                                 | 28.55446                               | 39.07169                               | 15.16768                               | 19.9937                                | 4.44726            | 21.71722                         |
| 10.0→12.0             | 10.0→12.5             | 17.49043                 | 21.51985                 | 22.46727                 | 4.02943                                 | 4.97684                                 | 39.07169                               | 50.06847                               | 19.9937                                | 24.71397                               | 7.29352            | 35.43752                         |
| 10.0→12.5             | 10.0→13.0             | 17.49043                 | 22.46727                 | 23.39186                 | 4.97684                                 | 5.90143                                 | 50.06847                               | 61.53325                               | 24.71397                               | 29.33359                               | 10.76562           | 52.04318                         |
| 10.0→13.0             | 10.0→13.5             | 17.49043                 | 23.39186                 | 24.29417                 | 5.90143                                 | 6.80374                                 | 61.53325                               | 73.45475                               | 29.33359                               | 33.85741                               | 14.83176           | 71.33491                         |
| 10.0→13.5             | 10.0→14.0             | 17.49043                 | 24.29417                 | 25.17474                 | 6.80374                                 | 7.68432                                 | 73.45475                               | 85.82198                               | 33.85741                               | 38.29007                               | 19.46129           | 93.12238                         |
| 10.0→14.0             | 10.0→14.5             | 17.49043                 | 25.17474                 | 26.0341                  | 7.68432                                 | 8.54367                                 | 85.82198                               | 98.62419                               | 38.29007                               | 42.63597                               | 24.62469           | 117.22399                        |
| 10.0→14.5             | 10.0→15.0             | 17.49043                 | 26.0341                  | 26.87274                 | 8.54367                                 | 9.38232                                 | 98.62419                               | 111.8509                               | 42.63597                               | 46.89929                               | 30.29357           | 143.46665                        |
| 10.0→15.0             | 10.0→15.5             | 17.49043                 | 26.87274                 | 27.69119                 | 9.38232                                 | 10.20076                                | 111.8509                               | 125.49188                              | 46.89929                               | 51.08403                               | 36.44055           | 171.68555                        |
| 10.0→15.5             | 10.0→16.0             | 17.49043                 | 27.69119                 | 28.48991                 | 10.20076                                | 10.99948                                | 125.49188                              | 139.53716                              | 51.08403                               | 55.19398                               | 43.03931           | 201.7239                         |
| 10.0→16.0             | 10.0→16.5             | 17.49043                 | 28.48991                 | 29.26939                 | 10.99948                                | 11.77896                                | 139.53716                              | 153.97698                              | 55.19398                               | 59.23276                               | 50.06451           | 233.43268                        |
| 10.0→16.5             | 10.0→17.0             | 17.49043                 | 29.26939                 | 30.03008                 | 11.77896                                | 12.53966                                | 153.97698                              | 168.80185                              | 59.23276                               | 63.20379                               | 57.49178           | 266.67039                        |
| 10.0→17.0             | 10.0→17.5             | 17.49043                 | 30.03008                 | 30.77245                 | 12.53966                                | 13.28203                                | 168.80185                              | 184.00248                              | 63.20379                               | 67.11035                               | 65.29764           | 301.30279                        |
| 10.0→17.5             | 10.0→18.0             | 17.49043                 | 30.77245                 | 31.49693                 | 13.28203                                | 14.00651                                | 184.00248                              | 199.56983                              | 67.11035                               | 70.95555                               | 73.45956           | 337.20264                        |
| 10.0→18.0             | 10.0→18.5             | 17.49043                 | 31.49693                 | 32.20396                 | 14.00651                                | 14.71353                                | 199.56983                              | 215.49505                              | 70.95555                               | 74.74237                               | 81.95584           | 374.24945                        |
| 10.0→18.5             | 10.0→19.0             | 17.49043                 | 32.20396                 | 32.89395                 | 14.71353                                | 15.40352                                | 215.49505                              | 231.76953                              | 74.74237                               | 78.47361                               | 90.76563           | 412.32923                        |
| 10.0→19.0             | 10.0→19.5             | 17.49043                 | 32.89395                 | 33.56731                 | 15.40352                                | 16.07689                                | 231.76953                              | 248.38484                              | 78.47361                               | 82.15196                               | 99.86889           | 451.3342                         |
| 10.0→19.5             | 10.0→20.0             | 17.49043                 | 33.56731                 | 34.22445                 | 16.07689                                | 16.73403                                | 248.38484                              | 265.33278                              | 82.15196                               | 85.77997                               | 109.24637          | 491.1626                         |
| 10.0→20.0             | /                     | /                        | /                        | /                        | /                                       | /                                       | /                                      | /                                      | /                                      | /                                      | /                  | /                                |

**Table S8** The calculated data from Fig. 6b for linear fitting of  $k'_3$  (at 150 °C) in Fig. 7b.

| $t_1 \rightarrow t_2$ | $t_1 \rightarrow t_3$ | $[5a]_{t_1} \times 10^3$ | $[5a]_{t_2} \times 10^3$ | $[5a]_{t_3} \times 10^3$ | $([5a]_{t_2} - [5a]_{t_1}) \times 10^3$ | $([5a]_{t_3} - [5a]_{t_1}) \times 10^3$ | $5a_{t_1 \rightarrow t_2} \times 10^3$ | $5a_{t_1 \rightarrow t_3} \times 10^3$ | $4a_{t_1 \rightarrow t_2} \times 10^3$ | $4a_{t_1 \rightarrow t_3} \times 10^3$ | H                  | I                                |
|-----------------------|-----------------------|--------------------------|--------------------------|--------------------------|-----------------------------------------|-----------------------------------------|----------------------------------------|----------------------------------------|----------------------------------------|----------------------------------------|--------------------|----------------------------------|
| [h]                   | [h]                   | [M]                      | [M]                      | [M]                      | [M]                                     | [M]                                     | [M h]                                  | [M h]                                  | [M h]                                  | [M h]                                  | [M <sup>2</sup> h] | [M <sup>2</sup> h <sup>2</sup> ] |
| 12.00→12.25           | 12.00→12.50           | 24.9993                  | 25.53462                 | 26.06048                 | 0.53532                                 | 1.06118                                 | 6.31674                                | 12.76613                               | 2.10797                                | 4.18418                                | 0.13079            | 0.48031                          |
| 12.00→12.50           | 12.00→12.75           | 24.9993                  | 26.06048                 | 26.57704                 | 1.06118                                 | 1.57774                                 | 12.76613                               | 19.34582                               | 4.18418                                | 6.22998                                | 0.38774            | 1.41363                          |
| 12.00→12.75           | 12.00→13.00           | 24.9993                  | 26.57704                 | 27.08447                 | 1.57774                                 | 2.08517                                 | 19.34582                               | 26.05351                               | 6.22998                                | 8.24669                                | 0.76635            | 2.77385                          |
| 12.00→13.00           | 12.00→13.25           | 24.9993                  | 27.08447                 | 27.58293                 | 2.08517                                 | 2.58363                                 | 26.05351                               | 32.88693                               | 8.24669                                | 10.23556                               | 1.26225            | 4.53598                          |
| 12.00→13.25           | 12.00→13.50           | 24.9993                  | 27.58293                 | 28.07258                 | 2.58363                                 | 3.07328                                 | 32.88693                               | 39.84387                               | 10.23556                               | 12.1978                                | 1.87116            | 6.67618                          |
| 12.00→13.50           | 12.00→13.75           | 24.9993                  | 28.07258                 | 28.55357                 | 3.07328                                 | 3.55427                                 | 39.84387                               | 46.92214                               | 12.1978                                | 14.13455                               | 2.58893            | 9.17165                          |
| 12.00→13.75           | 12.00→14.00           | 24.9993                  | 28.55357                 | 29.02606                 | 3.55427                                 | 4.02676                                 | 46.92214                               | 54.11959                               | 14.13455                               | 16.04691                               | 3.41153            | 12.00061                         |
| 12.00→14.00           | 12.00→14.25           | 24.9993                  | 29.02606                 | 29.49019                 | 4.02676                                 | 4.49089                                 | 54.11959                               | 61.43413                               | 16.04691                               | 17.93594                               | 4.33502            | 15.14231                         |
| 12.00→14.25           | 12.00→14.50           | 24.9993                  | 29.49019                 | 29.94613                 | 4.49089                                 | 4.94683                                 | 61.43413                               | 68.86367                               | 17.93594                               | 19.80264                               | 5.35559            | 18.57692                         |
| 12.00→14.50           | 12.00→14.75           | 24.9993                  | 29.94613                 | 30.394                   | 4.94683                                 | 5.3947                                  | 68.86367                               | 76.40618                               | 19.80264                               | 21.64797                               | 6.4695             | 22.28554                         |
| 12.00→14.75           | 12.00→15.00           | 24.9993                  | 30.394                   | 30.83395                 | 5.3947                                  | 5.83465                                 | 76.40618                               | 84.05967                               | 21.64797                               | 23.47285                               | 7.67314            | 26.25016                         |
| 12.00→15.00           | 12.00→15.25           | 24.9993                  | 30.83395                 | 31.26612                 | 5.83465                                 | 6.26682                                 | 84.05967                               | 91.82218                               | 23.47285                               | 25.27817                               | 8.96299            | 30.45362                         |
| 12.00→15.25           | 12.00→15.50           | 24.9993                  | 31.26612                 | 31.69066                 | 6.26682                                 | 6.69136                                 | 91.82218                               | 99.69178                               | 25.27817                               | 27.06477                               | 10.33563           | 34.87956                         |
| 12.00→15.50           | 12.00→15.75           | 24.9993                  | 31.69066                 | 32.10769                 | 6.69136                                 | 7.10839                                 | 99.69178                               | 107.66658                              | 27.06477                               | 28.83346                               | 11.78773           | 39.51244                         |
| 12.00→15.75           | 12.00→16.00           | 24.9993                  | 32.10769                 | 32.51735                 | 7.10839                                 | 7.51805                                 | 107.66658                              | 115.74471                              | 28.83346                               | 30.585                                 | 13.31603           | 44.33744                         |
| 12.00→16.00           | 12.00→16.25           | 24.9993                  | 32.51735                 | 32.91976                 | 7.51805                                 | 7.92046                                 | 115.74471                              | 123.92434                              | 30.585                                 | 32.32015                               | 14.91741           | 49.34047                         |
| 12.00→16.25           | 12.00→16.50           | 24.9993                  | 32.91976                 | 33.31507                 | 7.92046                                 | 8.31576                                 | 123.92434                              | 132.2037                               | 32.32015                               | 34.0396                                | 16.5888            | 54.50814                         |
| 12.00→16.50           | 12.00→16.75           | 24.9993                  | 33.31507                 | 33.70338                 | 8.31576                                 | 8.70408                                 | 132.2037                               | 140.581                                | 34.0396                                | 35.74403                               | 18.32722           | 59.82773                         |
| 12.00→16.75           | 12.00→17.00           | 24.9993                  | 33.70338                 | 34.08483                 | 8.70408                                 | 9.08553                                 | 140.581                                | 149.05453                              | 35.74403                               | 37.4341                                | 20.12977           | 65.28714                         |
| 12.00→17.00           | /                     | /                        | /                        | /                        | /                                       | /                                       | /                                      | /                                      | /                                      | /                                      | /                  | /                                |

**Table S9** The calculated data from Fig. 6a for linear fitting of  $k'_3$  (at 160 °C) in Fig. 7b.

| $t_1 \rightarrow t_2$ | $t_1 \rightarrow t_3$ | $[5a]_{t_1} \times 10^3$ | $[5a]_{t_2} \times 10^3$ | $[5a]_{t_3} \times 10^3$ | $([5a]_{t_2} - [5a]_{t_1}) \times 10^3$ | $([5a]_{t_3} - [5a]_{t_1}) \times 10^3$ | $5a_{t_1 \rightarrow t_2} \times 10^3$ | $5a_{t_1 \rightarrow t_3} \times 10^3$ | $4a_{t_1 \rightarrow t_2} \times 10^3$ | $4a_{t_1 \rightarrow t_3} \times 10^3$ | H                  | I                                |
|-----------------------|-----------------------|--------------------------|--------------------------|--------------------------|-----------------------------------------|-----------------------------------------|----------------------------------------|----------------------------------------|----------------------------------------|----------------------------------------|--------------------|----------------------------------|
| [h]                   | [h]                   | [M]                      | [M]                      | [M]                      | [M]                                     | [M]                                     | [M h]                                  | [M h]                                  | [M h]                                  | [M h]                                  | [M <sup>2</sup> h] | [M <sup>2</sup> h <sup>2</sup> ] |
| 8.00→8.25             | 8.00→8.50             | 22.00007                 | 22.78713                 | 23.543                   | 0.78706                                 | 1.54293                                 | 5.5984                                 | 11.38967                               | 1.97071                                | 3.88655                                | 0.32641            | 0.68722                          |
| 8.00→8.50             | 8.00→8.75             | 22.00007                 | 23.543                   | 24.26892                 | 1.54293                                 | 2.26884                                 | 11.38967                               | 17.36616                               | 3.88655                                | 5.74979                                | 0.95336            | 2.00627                          |
| 8.00→8.75             | 8.00→9.00             | 22.00007                 | 24.26892                 | 24.96607                 | 2.26884                                 | 2.96599                                 | 17.36616                               | 23.52053                               | 5.74979                                | 7.56258                                | 1.85651            | 3.9051                           |
| 8.00→9.00             | 8.00→9.25             | 22.00007                 | 24.96607                 | 25.63559                 | 2.96599                                 | 3.63551                                 | 23.52053                               | 29.84574                               | 7.56258                                | 9.32701                                | 3.013              | 6.33478                          |
| 8.00→9.25             | 8.00→9.50             | 22.00007                 | 25.63559                 | 26.27858                 | 3.63551                                 | 4.2785                                  | 29.84574                               | 36.33501                               | 9.32701                                | 11.04504                               | 4.40132            | 9.24936                          |
| 8.00→9.50             | 8.00→9.75             | 22.00007                 | 26.27858                 | 26.89609                 | 4.2785                                  | 4.89601                                 | 36.33501                               | 42.98184                               | 11.04504                               | 12.7186                                | 6.00129            | 12.60574                         |
| 8.00→9.75             | 8.00→10.00            | 22.00007                 | 26.89609                 | 27.48912                 | 4.89601                                 | 5.48905                                 | 42.98184                               | 49.77999                               | 12.7186                                | 14.34951                               | 7.79395            | 16.36347                         |
| 8.00→10.00            | 8.00→10.25            | 22.00007                 | 27.48912                 | 28.05866                 | 5.48905                                 | 6.05859                                 | 49.77999                               | 56.72347                               | 14.34951                               | 15.93953                               | 9.76151            | 20.48462                         |
| 8.00→10.25            | 8.00→10.50            | 22.00007                 | 28.05866                 | 28.60563                 | 6.05859                                 | 6.60555                                 | 56.72347                               | 63.8065                                | 15.93953                               | 17.49032                               | 11.8873            | 24.93368                         |
| 8.00→10.50            | 8.00→10.75            | 22.00007                 | 28.60563                 | 29.13092                 | 6.60555                                 | 7.13085                                 | 63.8065                                | 71.02357                               | 17.49032                               | 19.00352                               | 14.15569           | 29.67737                         |
| 8.00→10.75            | 8.00→11.00            | 22.00007                 | 29.13092                 | 29.6354                  | 7.13085                                 | 7.63532                                 | 71.02357                               | 78.36936                               | 19.00352                               | 20.48065                               | 16.55203           | 34.68458                         |
| 8.00→11.00            | 8.00→11.25            | 22.00007                 | 29.6354                  | 30.11988                 | 7.63532                                 | 8.11981                                 | 78.36936                               | 85.83877                               | 20.48065                               | 21.9232                                | 19.06263           | 39.92619                         |
| 8.00→11.25            | 8.00→11.50            | 22.00007                 | 30.11988                 | 30.58517                 | 8.11981                                 | 8.58509                                 | 85.83877                               | 93.4269                                | 21.9232                                | 23.3326                                | 21.67466           | 45.37504                         |
| 8.00→11.50            | 8.00→11.75            | 22.00007                 | 30.58517                 | 31.03201                 | 8.58509                                 | 9.03194                                 | 93.4269                                | 101.12905                              | 23.3326                                | 24.71021                               | 24.37615           | 51.00572                         |
| 8.00→11.75            | 8.00→12.00            | 22.00007                 | 31.03201                 | 31.46115                 | 9.03194                                 | 9.46108                                 | 101.12905                              | 108.94069                              | 24.71021                               | 26.05733                               | 27.1559            | 56.79457                         |
| 8.00→12.00            | 8.00→12.25            | 22.00007                 | 31.46115                 | 31.87328                 | 9.46108                                 | 9.87321                                 | 108.94069                              | 116.8575                               | 26.05733                               | 27.37521                               | 30.00346           | 62.71952                         |
| 8.00→12.25            | 8.00→12.50            | 22.00007                 | 31.87328                 | 32.26908                 | 9.87321                                 | 10.26901                                | 116.8575                               | 124.87529                              | 27.37521                               | 28.66506                               | 32.9091            | 68.76002                         |
| 8.00→12.50            | 8.00→12.75            | 22.00007                 | 32.26908                 | 32.6492                  | 10.26901                                | 10.64913                                | 124.87529                              | 132.99008                              | 28.66506                               | 29.92804                               | 35.86374           | 74.89696                         |
| 8.00→12.75            | 8.00→13.00            | 22.00007                 | 32.6492                  | 33.01425                 | 10.64913                                | 11.01418                                | 132.99008                              | 141.19801                              | 29.92804                               | 31.16523                               | 38.85894           | 81.11259                         |
| 8.00→13.00            | /                     |                          |                          | /                        |                                         | /                                       |                                        | /                                      |                                        | /                                      | /                  | /                                |

**Table S10** The calculated data from Fig. 6d for linear fitting of  $k'_{-3}$  (at 130 °C) in Fig. 7c.

| $t_1 \rightarrow t_2$<br>[h] | $[5a]_{t_1} \times 10^3$<br>[M] | $[5a]_{t_2} \times 10^3$<br>[M] | $([5a]_{t_1} - [5a]_{t_2}) \times 10^3$<br>[M] | $4a_{t_1 \rightarrow t_2} \times 10^3$<br>[M h] | J<br>[M] | $5a_{t_1 \rightarrow t_2} \times 10^3$<br>[M h] |
|------------------------------|---------------------------------|---------------------------------|------------------------------------------------|-------------------------------------------------|----------|-------------------------------------------------|
| 10.00→10.30                  | 13.69727                        | 14.28874                        | -0.59146                                       | 3.97378                                         | 0.00321  | 4.1979                                          |
| 10.00→10.60                  | 13.69727                        | 14.86754                        | -1.17027                                       | 7.88415                                         | 0.0096   | 8.57134                                         |
| 10.00→10.90                  | 13.69727                        | 15.43395                        | -1.73668                                       | 11.73117                                        | 0.01889  | 13.11657                                        |
| 10.00→11.20                  | 13.69727                        | 15.98824                        | -2.29097                                       | 15.51486                                        | 0.03083  | 17.8299                                         |
| 10.00→11.50                  | 13.69727                        | 16.53066                        | -2.83339                                       | 19.23526                                        | 0.04517  | 22.70773                                        |
| 10.00→11.80                  | 13.69727                        | 17.06148                        | -3.3642                                        | 22.89242                                        | 0.06165  | 27.74655                                        |
| 10.00→12.10                  | 13.69727                        | 17.58092                        | -3.88365                                       | 26.48637                                        | 0.08004  | 32.94291                                        |
| 10.00→12.40                  | 13.69727                        | 18.08925                        | -4.39198                                       | 30.01716                                        | 0.10009  | 38.29344                                        |
| 10.00→12.70                  | 13.69727                        | 18.5867                         | -4.88943                                       | 33.48481                                        | 0.12157  | 43.79483                                        |
| 10.00→13.00                  | 13.69727                        | 19.0735                         | -5.37623                                       | 36.88936                                        | 0.14427  | 49.44386                                        |
| 10.00→13.30                  | 13.69727                        | 19.54988                        | -5.8526                                        | 40.23087                                        | 0.16795  | 55.23737                                        |
| 10.00→13.60                  | 13.69727                        | 20.01606                        | -6.31879                                       | 43.50936                                        | 0.19239  | 61.17226                                        |
| 10.00→13.90                  | 13.69727                        | 20.47226                        | -6.77499                                       | 46.72486                                        | 0.21739  | 67.24551                                        |
| 10.00→14.20                  | 13.69727                        | 20.9187                         | -7.22142                                       | 49.87743                                        | 0.24273  | 73.45415                                        |
| 10.00→14.50                  | 13.69727                        | 21.35558                        | -7.6583                                        | 52.9671                                         | 0.26822  | 79.7953                                         |
| 10.00→14.80                  | 13.69727                        | 21.78311                        | -8.08583                                       | 55.99391                                        | 0.29366  | 86.2661                                         |
| 10.00→15.10                  | 13.69727                        | 22.20148                        | -8.50421                                       | 58.95789                                        | 0.31884  | 92.86379                                        |
| 10.00→15.40                  | 13.69727                        | 22.6109                         | -8.91363                                       | 61.85908                                        | 0.34358  | 99.58564                                        |
| 10.00→15.70                  | 13.69727                        | 23.01156                        | -9.31428                                       | 64.69752                                        | 0.3677   | 106.42901                                       |
| 10.00→16.00                  | 13.69727                        | 23.40364                        | -9.70636                                       | 67.47326                                        | 0.39101  | 113.39129                                       |

**Table S11** The calculated data from Fig. 6c for linear fitting of  $k'_{-3}$  (at 140 °C) in Fig. 7c.

| $t_1 \rightarrow t_2$<br>[h] | $[5a]_{t_1} \times 10^3$<br>[M] | $[5a]_{t_2} \times 10^3$<br>[M] | $([5a]_{t_1} - [5a]_{t_2}) \times 10^3$<br>[M] | $4a_{t_1 \rightarrow t_2} \times 10^3$<br>[M h] | J<br>[M] | $5a_{t_1 \rightarrow t_2} \times 10^3$<br>[M h] |
|------------------------------|---------------------------------|---------------------------------|------------------------------------------------|-------------------------------------------------|----------|-------------------------------------------------|
| 10.00→10.50                  | 17.49043                        | 18.53493                        | -1.0445                                        | 5.17661                                         | 0.10377  | 9.00634                                         |
| 10.00→11.00                  | 17.49043                        | 19.55427                        | -2.06384                                       | 10.23052                                        | 0.20549  | 18.52864                                        |
| 10.00→11.50                  | 17.49043                        | 20.54904                        | -3.05862                                       | 15.16768                                        | 0.30588  | 28.55446                                        |
| 10.00→12.00                  | 17.49043                        | 21.51985                        | -4.02943                                       | 19.9937                                         | 0.40558  | 39.07169                                        |
| 10.00→12.50                  | 17.49043                        | 22.46727                        | -4.97684                                       | 24.71397                                        | 0.50521  | 50.06847                                        |
| 10.00→13.00                  | 17.49043                        | 23.39186                        | -5.90143                                       | 29.33359                                        | 0.60534  | 61.53325                                        |
| 10.00→13.50                  | 17.49043                        | 24.29417                        | -6.80374                                       | 33.85741                                        | 0.70651  | 73.45475                                        |
| 10.00→14.00                  | 17.49043                        | 25.17474                        | -7.68432                                       | 38.29007                                        | 0.80919  | 85.82198                                        |
| 10.00→14.50                  | 17.49043                        | 26.0341                         | -8.54367                                       | 42.63597                                        | 0.91384  | 98.62419                                        |
| 10.00→15.00                  | 17.49043                        | 26.87274                        | -9.38232                                       | 46.89929                                        | 1.02088  | 111.8509                                        |
| 10.00→15.50                  | 17.49043                        | 27.69119                        | -10.20076                                      | 51.08403                                        | 1.1307   | 125.49188                                       |
| 10.00→16.00                  | 17.49043                        | 28.48991                        | -10.99948                                      | 55.19398                                        | 1.24365  | 139.53716                                       |
| 10.00→16.50                  | 17.49043                        | 29.26939                        | -11.77896                                      | 59.23276                                        | 1.36005  | 153.97698                                       |
| 10.00→17.00                  | 17.49043                        | 30.03008                        | -12.53966                                      | 63.20379                                        | 1.48021  | 168.80185                                       |
| 10.00→17.50                  | 17.49043                        | 30.77245                        | -13.28203                                      | 67.11035                                        | 1.60439  | 184.00248                                       |
| 10.00→18.00                  | 17.49043                        | 31.49693                        | -14.00651                                      | 70.95555                                        | 1.73285  | 199.56983                                       |
| 10.00→18.50                  | 17.49043                        | 32.20396                        | -14.71353                                      | 74.74237                                        | 1.86582  | 215.49505                                       |
| 10.00→19.00                  | 17.49043                        | 32.89395                        | -15.40352                                      | 78.47361                                        | 2.00349  | 231.76953                                       |
| 10.00→19.50                  | 17.49043                        | 33.56731                        | -16.07689                                      | 82.15196                                        | 2.14606  | 248.38484                                       |
| 10.00→20.00                  | 17.49043                        | 34.22445                        | -16.73403                                      | 85.77997                                        | 2.29369  | 265.33278                                       |

**Table S12** The calculated data from Fig. 6b for linear fitting of  $k'_{-3}$  (at 150 °C) in Fig. 7c.

| $t_1 \rightarrow t_2$ | $[5a]_{t_1} \times 10^3$ | $[5a]_{t_2} \times 10^3$ | $([5a]_{t_1} - [5a]_{t_2}) \times 10^3$ | $4a_{t_1 \rightarrow t_2} \times 10^3$ | J       | $5a_{t_1 \rightarrow t_2} \times 10^3$ |
|-----------------------|--------------------------|--------------------------|-----------------------------------------|----------------------------------------|---------|----------------------------------------|
| [h]                   | [M]                      | [M]                      | [M]                                     | [M h]                                  | [M]     | [M h]                                  |
| 12.00→12.25           | 24.9993                  | 25.53462                 | -0.53532                                | 2.10797                                | 0.11259 | 6.31674                                |
| 12.00→12.50           | 24.9993                  | 26.06048                 | -1.06118                                | 4.18418                                | 0.22487 | 12.76613                               |
| 12.00→12.75           | 24.9993                  | 26.57704                 | -1.57774                                | 6.22998                                | 0.3371  | 19.34582                               |
| 12.00→13.00           | 24.9993                  | 27.08447                 | -2.08517                                | 8.24669                                | 0.44953 | 26.05351                               |
| 12.00→13.25           | 24.9993                  | 27.58293                 | -2.58363                                | 10.23556                               | 0.56237 | 32.88693                               |
| 12.00→13.50           | 24.9993                  | 28.07258                 | -3.07328                                | 12.1978                                | 0.67584 | 39.84387                               |
| 12.00→13.75           | 24.9993                  | 28.55357                 | -3.55427                                | 14.13455                               | 0.79013 | 46.92214                               |
| 12.00→14.00           | 24.9993                  | 29.02606                 | -4.02676                                | 16.04691                               | 0.90542 | 54.11959                               |
| 12.00→14.25           | 24.9993                  | 29.49019                 | -4.49089                                | 17.93594                               | 1.0219  | 61.43413                               |
| 12.00→14.50           | 24.9993                  | 29.94613                 | -4.94683                                | 19.80264                               | 1.13971 | 68.86367                               |
| 12.00→14.75           | 24.9993                  | 30.394                   | -5.3947                                 | 21.64797                               | 1.25902 | 76.40618                               |
| 12.00→15.00           | 24.9993                  | 30.83395                 | -5.83465                                | 23.47285                               | 1.37997 | 84.05967                               |
| 12.00→15.25           | 24.9993                  | 31.26612                 | -6.26682                                | 25.27817                               | 1.50267 | 91.82218                               |
| 12.00→15.50           | 24.9993                  | 31.69066                 | -6.69136                                | 27.06477                               | 1.62727 | 99.69178                               |
| 12.00→15.75           | 24.9993                  | 32.10769                 | -7.10839                                | 28.83346                               | 1.75386 | 107.66658                              |
| 12.00→16.00           | 24.9993                  | 32.51735                 | -7.51805                                | 30.585                                 | 1.88256 | 115.74471                              |
| 12.00→16.25           | 24.9993                  | 32.91976                 | -7.92046                                | 32.32015                               | 2.01346 | 123.92434                              |
| 12.00→16.50           | 24.9993                  | 33.31507                 | -8.31576                                | 34.0396                                | 2.14665 | 132.2037                               |
| 12.00→16.75           | 24.9993                  | 33.70338                 | -8.70408                                | 35.74403                               | 2.28221 | 140.581                                |
| 12.00→17.00           | 24.9993                  | 34.08483                 | -9.08553                                | 37.4341                                | 2.42022 | 149.05453                              |

**Table S13** The calculated data from Fig. 6a for linear fitting of  $k'_{-3}$  (at 160 °C) in Fig. 7c.

| $t_1 \rightarrow t_2$ | $[5a]_{t_1} \times 10^3$ | $[5a]_{t_2} \times 10^3$ | $([5a]_{t_1} - [5a]_{t_2}) \times 10^3$ | $4a_{t_1 \rightarrow t_2} \times 10^3$ | J       | $5a_{t_1 \rightarrow t_2} \times 10^3$ |
|-----------------------|--------------------------|--------------------------|-----------------------------------------|----------------------------------------|---------|----------------------------------------|
| [h]                   | [M]                      | [M]                      | [M]                                     | [M h]                                  | [M]     | [M h]                                  |
| 8.00→8.25             | 22.00007                 | 22.78713                 | -0.78706                                | 1.97071                                | 0.15683 | 5.5984                                 |
| 8.00→8.50             | 22.00007                 | 23.543                   | -1.54293                                | 3.88655                                | 0.31858 | 11.38967                               |
| 8.00→8.75             | 22.00007                 | 24.26892                 | -2.26884                                | 5.74979                                | 0.48508 | 17.36616                               |
| 8.00→9.00             | 22.00007                 | 24.96607                 | -2.96599                                | 7.56258                                | 0.65618 | 23.52053                               |
| 8.00→9.25             | 22.00007                 | 25.63559                 | -3.63551                                | 9.32701                                | 0.83175 | 29.84574                               |
| 8.00→9.50             | 22.00007                 | 26.27858                 | -4.2785                                 | 11.04504                               | 1.01163 | 36.33501                               |
| 8.00→9.75             | 22.00007                 | 26.89609                 | -4.89601                                | 12.7186                                | 1.19569 | 42.98184                               |
| 8.00→10.00            | 22.00007                 | 27.48912                 | -5.48905                                | 14.34951                               | 1.38379 | 49.77999                               |
| 8.00→10.25            | 22.00007                 | 28.05866                 | -6.05859                                | 15.93953                               | 1.57581 | 56.72347                               |
| 8.00→10.50            | 22.00007                 | 28.60563                 | -6.60555                                | 17.49032                               | 1.77161 | 63.8065                                |
| 8.00→10.75            | 22.00007                 | 29.13092                 | -7.13085                                | 19.00352                               | 1.97108 | 71.02357                               |
| 8.00→11.00            | 22.00007                 | 29.6354                  | -7.63532                                | 20.48065                               | 2.17409 | 78.36936                               |
| 8.00→11.25            | 22.00007                 | 30.11988                 | -8.11981                                | 21.9232                                | 2.38053 | 85.83877                               |
| 8.00→11.50            | 22.00007                 | 30.58517                 | -8.58509                                | 23.3326                                | 2.59029 | 93.4269                                |
| 8.00→11.75            | 22.00007                 | 31.03201                 | -9.03194                                | 24.71021                               | 2.80326 | 101.12905                              |
| 8.00→12.00            | 22.00007                 | 31.46115                 | -9.46108                                | 26.05733                               | 3.01934 | 108.94069                              |
| 8.00→12.25            | 22.00007                 | 31.87328                 | -9.87321                                | 27.37521                               | 3.23842 | 116.8575                               |
| 8.00→12.50            | 22.00007                 | 32.26908                 | -10.26901                               | 28.66506                               | 3.46041 | 124.87529                              |
| 8.00→12.75            | 22.00007                 | 32.6492                  | -10.64913                               | 29.92804                               | 3.68521 | 132.99008                              |
| 8.00→13.00            | 22.00007                 | 33.01425                 | -11.01418                               | 31.16523                               | 3.91272 | 141.19801                              |

**Table S14** The calculated data from Fig. 9d for linear fitting of  $k_1''$  (at 110 °C) in Fig. 10a.

| $t_1 \rightarrow t_2$<br>[h] | $[\mathbf{2a}]_{t_1} \times 10^3$<br>[M] | $[\mathbf{2a}]_{t_2} \times 10^3$<br>[M] | $[\ln([\mathbf{2a}]_{t_1}/[\mathbf{2a}]_{t_2})]$<br>/ | $t_2 - t_1$<br>[h] |
|------------------------------|------------------------------------------|------------------------------------------|-------------------------------------------------------|--------------------|
| 8.00→8.40                    | 40.00854                                 | 39.73389                                 | 0.00689                                               | 0.40               |
| 8.00→8.80                    | 40.00854                                 | 39.42871                                 | 0.0146                                                | 0.80               |
| 8.00→9.20                    | 40.00854                                 | 39.12354                                 | 0.02237                                               | 1.20               |
| 8.00→9.60                    | 40.00854                                 | 38.81836                                 | 0.0302                                                | 1.60               |
| 8.00→10.00                   | 40.00854                                 | 38.51318                                 | 0.03809                                               | 2.00               |
| 8.00→10.40                   | 40.00854                                 | 38.20801                                 | 0.04605                                               | 2.40               |
| 8.00→10.80                   | 40.00854                                 | 37.93335                                 | 0.05326                                               | 2.80               |
| 8.00→11.20                   | 40.00854                                 | 37.62817                                 | 0.06134                                               | 3.20               |
| 8.00→11.60                   | 40.00854                                 | 37.323                                   | 0.06948                                               | 3.60               |
| 8.00→12.00                   | 40.00854                                 | 37.01782                                 | 0.07769                                               | 4.00               |
| 8.00→12.40                   | 40.00854                                 | 36.71265                                 | 0.08597                                               | 4.40               |
| 8.00→12.80                   | 40.00854                                 | 36.40747                                 | 0.09432                                               | 4.80               |
| 8.00→13.20                   | 40.00854                                 | 36.13281                                 | 0.10189                                               | 5.20               |
| 8.00→13.60                   | 40.00854                                 | 35.82764                                 | 0.11037                                               | 5.60               |
| 8.00→14.00                   | 40.00854                                 | 35.52246                                 | 0.11893                                               | 6.00               |
| 8.00→14.40                   | 40.00854                                 | 35.21729                                 | 0.12756                                               | 6.40               |
| 8.00→14.80                   | 40.00854                                 | 34.91211                                 | 0.13626                                               | 6.80               |
| 8.00→15.20                   | 40.00854                                 | 34.60693                                 | 0.14504                                               | 7.20               |
| 8.00→15.60                   | 40.00854                                 | 34.33228                                 | 0.15301                                               | 7.60               |
| 8.00→16.00                   | 40.00854                                 | 34.0271                                  | 0.16194                                               | 8.00               |

**Table S15** The calculated data from Fig. 9c for linear fitting of  $k_1''$  (at 120 °C) in Fig. 10a.

| $t_1 \rightarrow t_2$<br>[h] | $[\mathbf{2a}]_{t_1} \times 10^3$<br>[M] | $[\mathbf{2a}]_{t_2} \times 10^3$<br>[M] | $[\ln([\mathbf{2a}]_{t_1}/[\mathbf{2a}]_{t_2})]$<br>/ | $t_2 - t_1$<br>[h] |
|------------------------------|------------------------------------------|------------------------------------------|-------------------------------------------------------|--------------------|
| 20.00→20.60                  | 23.00404                                 | 22.51193                                 | 0.02162                                               | 0.60               |
| 20.00→21.20                  | 23.00404                                 | 22.03439                                 | 0.04307                                               | 1.20               |
| 20.00→21.80                  | 23.00404                                 | 21.57099                                 | 0.06432                                               | 1.80               |
| 20.00→22.40                  | 23.00404                                 | 21.12129                                 | 0.08539                                               | 2.40               |
| 20.00→23.00                  | 23.00404                                 | 20.68491                                 | 0.10627                                               | 3.00               |
| 20.00→23.60                  | 23.00404                                 | 20.26143                                 | 0.12695                                               | 3.60               |
| 20.00→24.20                  | 23.00404                                 | 19.85049                                 | 0.14744                                               | 4.20               |
| 20.00→24.80                  | 23.00404                                 | 19.45171                                 | 0.16773                                               | 4.80               |
| 20.00→25.40                  | 23.00404                                 | 19.06473                                 | 0.18783                                               | 5.40               |
| 20.00→26.00                  | 23.00404                                 | 18.68921                                 | 0.20772                                               | 6.00               |
| 20.00→26.60                  | 23.00404                                 | 18.32479                                 | 0.22741                                               | 6.60               |
| 20.00→27.20                  | 23.00404                                 | 17.97117                                 | 0.2469                                                | 7.20               |
| 20.00→27.80                  | 23.00404                                 | 17.628                                   | 0.26618                                               | 7.80               |
| 20.00→28.40                  | 23.00404                                 | 17.29499                                 | 0.28525                                               | 8.40               |
| 20.00→29.00                  | 23.00404                                 | 16.97184                                 | 0.30411                                               | 9.00               |
| 20.00→29.60                  | 23.00404                                 | 16.65825                                 | 0.32276                                               | 9.60               |
| 20.00→30.20                  | 23.00404                                 | 16.35393                                 | 0.3412                                                | 10.20              |
| 20.00→30.80                  | 23.00404                                 | 16.05863                                 | 0.35942                                               | 10.80              |
| 20.00→31.40                  | 23.00404                                 | 15.77206                                 | 0.37743                                               | 11.40              |
| 20.00→32.00                  | 23.00404                                 | 15.49398                                 | 0.39522                                               | 12.00              |



**Table S16** The calculated data from Fig. 9b for linear fitting of  $k_1''$  (at 130 °C) in Fig. 10a.

| $t_1 \rightarrow t_2$<br>[h] | $[\mathbf{2a}]_{t_1} \times 10^3$<br>[M] | $[\mathbf{2a}]_{t_2} \times 10^3$<br>[M] | $[\ln([\mathbf{2a}]_{t_1}/[\mathbf{2a}]_{t_2})]$<br>/ | $t_2 - t_1$<br>[h] |
|------------------------------|------------------------------------------|------------------------------------------|-------------------------------------------------------|--------------------|
| 20.00→20.60                  | 13.99214                                 | 13.4774                                  | 0.03748                                               | 0.60               |
| 20.00→21.20                  | 13.99214                                 | 12.98963                                 | 0.07434                                               | 1.20               |
| 20.00→21.80                  | 13.99214                                 | 12.52742                                 | 0.11058                                               | 1.80               |
| 20.00→22.40                  | 13.99214                                 | 12.08942                                 | 0.14617                                               | 2.40               |
| 20.00→23.00                  | 13.99214                                 | 11.67436                                 | 0.1811                                                | 3.00               |
| 20.00→23.60                  | 13.99214                                 | 11.28105                                 | 0.21537                                               | 3.60               |
| 20.00→24.20                  | 13.99214                                 | 10.90835                                 | 0.24897                                               | 4.20               |
| 20.00→24.80                  | 13.99214                                 | 10.55517                                 | 0.28188                                               | 4.80               |
| 20.00→25.40                  | 13.99214                                 | 10.22049                                 | 0.3141                                                | 5.40               |
| 20.00→26.00                  | 13.99214                                 | 9.90335                                  | 0.34562                                               | 6.00               |
| 20.00→26.60                  | 13.99214                                 | 9.60282                                  | 0.37644                                               | 6.60               |
| 20.00→27.20                  | 13.99214                                 | 9.31803                                  | 0.40654                                               | 7.20               |
| 20.00→27.80                  | 13.99214                                 | 9.04817                                  | 0.43593                                               | 7.80               |
| 20.00→28.40                  | 13.99214                                 | 8.79244                                  | 0.4646                                                | 8.40               |
| 20.00→29.00                  | 13.99214                                 | 8.55011                                  | 0.49255                                               | 9.00               |
| 20.00→29.60                  | 13.99214                                 | 8.32048                                  | 0.51978                                               | 9.60               |
| 20.00→30.20                  | 13.99214                                 | 8.10287                                  | 0.54628                                               | 10.20              |
| 20.00→30.80                  | 13.99214                                 | 7.89667                                  | 0.57205                                               | 10.80              |
| 20.00→31.40                  | 13.99214                                 | 7.70127                                  | 0.59711                                               | 11.40              |
| 20.00→32.00                  | 13.99214                                 | 7.51611                                  | 0.62145                                               | 12.00              |

**Table S17** The calculated data from Fig. 9a for linear fitting of  $k_1''$  (at 140 °C) in Fig. 10a.

| $t_1 \rightarrow t_2$<br>[h] | $[\mathbf{2a}]_{t_1} \times 10^3$<br>[M] | $[\mathbf{2a}]_{t_2} \times 10^3$<br>[M] | $[\ln([\mathbf{2a}]_{t_1}/[\mathbf{2a}]_{t_2})]$<br>/ | $t_2 - t_1$<br>[h] |
|------------------------------|------------------------------------------|------------------------------------------|-------------------------------------------------------|--------------------|
| 7.00→7.25                    | 26.38988                                 | 25.96854                                 | 0.01609                                               | 0.25               |
| 7.00→7.50                    | 26.38988                                 | 25.54762                                 | 0.03244                                               | 0.50               |
| 7.00→7.75                    | 26.38988                                 | 25.12712                                 | 0.04903                                               | 0.75               |
| 7.00→8.00                    | 26.38988                                 | 24.70703                                 | 0.06589                                               | 1.00               |
| 7.00→8.25                    | 26.38988                                 | 24.28736                                 | 0.08302                                               | 1.25               |
| 7.00→8.50                    | 26.38988                                 | 23.8681                                  | 0.10044                                               | 1.50               |
| 7.00→8.75                    | 26.38988                                 | 23.44926                                 | 0.11814                                               | 1.75               |
| 7.00→9.00                    | 26.38988                                 | 23.03083                                 | 0.13615                                               | 2.00               |
| 7.00→9.25                    | 26.38988                                 | 22.61282                                 | 0.15446                                               | 2.25               |
| 7.00→9.50                    | 26.38988                                 | 22.19521                                 | 0.1731                                                | 2.50               |
| 7.00→9.75                    | 26.38988                                 | 21.77803                                 | 0.19208                                               | 2.75               |
| 7.00→10.00                   | 26.38988                                 | 21.36125                                 | 0.2114                                                | 3.00               |
| 7.00→10.25                   | 26.38988                                 | 20.94489                                 | 0.23109                                               | 3.25               |
| 7.00→10.50                   | 26.38988                                 | 20.52893                                 | 0.25115                                               | 3.50               |
| 7.00→10.75                   | 26.38988                                 | 20.11339                                 | 0.27159                                               | 3.75               |
| 7.00→11.00                   | 26.38988                                 | 19.69826                                 | 0.29245                                               | 4.00               |
| 7.00→11.25                   | 26.38988                                 | 19.28354                                 | 0.31373                                               | 4.25               |
| 7.00→11.50                   | 26.38988                                 | 18.86923                                 | 0.33545                                               | 4.50               |
| 7.00→11.75                   | 26.38988                                 | 18.45534                                 | 0.35763                                               | 4.75               |
| 7.00→12.00                   | 26.38988                                 | 18.04184                                 | 0.38029                                               | 5.00               |

**Table S18** The calculated data from Fig. 9d for linear fitting of  $k_3''$  (at 110 °C) in Fig. 10b.

| $t_1 \rightarrow t_2$ | $[\mathbf{5a}]_{t_1} \times 10^3$ | $[\mathbf{5a}]_{t_2} \times 10^3$ | $([\mathbf{5a}]_{t_2} - [\mathbf{5a}]_{t_1}) \times 10^3$ | $4\mathbf{a}_{t_1 \rightarrow t_2} \times 10^3$ |
|-----------------------|-----------------------------------|-----------------------------------|-----------------------------------------------------------|-------------------------------------------------|
| [h]                   | [M]                               | [M]                               | [M]                                                       | [M h]                                           |
| 6.00→6.20             | 3.51003                           | 4.18845                           | 0.67842                                                   | 0.58547                                         |
| 6.00→6.40             | 3.51003                           | 4.82009                           | 1.31005                                                   | 1.13707                                         |
| 6.00→6.60             | 3.51003                           | 5.40817                           | 1.89813                                                   | 1.65597                                         |
| 6.00→6.80             | 3.51003                           | 5.95569                           | 2.44566                                                   | 2.14329                                         |
| 6.00→7.00             | 3.51003                           | 6.46546                           | 2.95543                                                   | 2.60012                                         |
| 6.00→7.20             | 3.51003                           | 6.94008                           | 3.43004                                                   | 3.02751                                         |
| 6.00→7.40             | 3.51003                           | 7.38196                           | 3.87193                                                   | 3.42648                                         |
| 6.00→7.60             | 3.51003                           | 7.79338                           | 4.28334                                                   | 3.79801                                         |
| 6.00→7.80             | 3.51003                           | 8.17642                           | 4.66639                                                   | 4.14304                                         |
| 6.00→8.00             | 3.51003                           | 8.53305                           | 5.02302                                                   | 4.46248                                         |
| 6.00→8.20             | 3.51003                           | 8.86509                           | 5.35505                                                   | 4.75722                                         |
| 6.00→8.40             | 3.51003                           | 9.17423                           | 5.66419                                                   | 5.02811                                         |
| 6.00→8.60             | 3.51003                           | 9.46205                           | 5.95201                                                   | 5.27597                                         |
| 6.00→8.80             | 3.51003                           | 9.73002                           | 6.21999                                                   | 5.50159                                         |
| 6.00→9.00             | 3.51003                           | 9.97952                           | 6.46948                                                   | 5.70575                                         |
| 6.00→9.20             | 3.51003                           | 10.21181                          | 6.70177                                                   | 5.88918                                         |
| 6.00→9.40             | 3.51003                           | 10.42808                          | 6.91805                                                   | 6.05259                                         |
| 6.00→9.60             | 3.51003                           | 10.62944                          | 7.1194                                                    | 6.19668                                         |
| 6.00→9.80             | 3.51003                           | 10.81691                          | 7.30688                                                   | 6.32211                                         |
| 6.00→10.00            | 3.51003                           | 10.99145                          | 7.48142                                                   | 6.42952                                         |

**Table S19** The calculated data from Fig. 9c for linear fitting of  $k_3''$  (at 120 °C) in Fig. 10b.

| $t_1 \rightarrow t_2$ | $[\mathbf{5a}]_{t_1} \times 10^3$ | $[\mathbf{5a}]_{t_2} \times 10^3$ | $([\mathbf{5a}]_{t_2} - [\mathbf{5a}]_{t_1}) \times 10^3$ | $4\mathbf{a}_{t_1 \rightarrow t_2} \times 10^3$ |
|-----------------------|-----------------------------------|-----------------------------------|-----------------------------------------------------------|-------------------------------------------------|
| [h]                   | [M]                               | [M]                               | [M]                                                       | [M h]                                           |
| 5.000→5.125           | 5.72471                           | 6.14816                           | 0.42345                                                   | 0.31575                                         |
| 5.000→5.250           | 5.72471                           | 6.55029                           | 0.82559                                                   | 0.61153                                         |
| 5.000→5.375           | 5.72471                           | 6.93219                           | 1.20748                                                   | 0.88816                                         |
| 5.000→5.500           | 5.72471                           | 7.29485                           | 1.57015                                                   | 1.1464                                          |
| 5.000→5.625           | 5.72471                           | 7.63926                           | 1.91456                                                   | 1.38699                                         |
| 5.000→5.750           | 5.72471                           | 7.96634                           | 2.24163                                                   | 1.61065                                         |
| 5.000→5.875           | 5.72471                           | 8.27694                           | 2.55224                                                   | 1.81804                                         |
| 5.000→6.000           | 5.72471                           | 8.57191                           | 2.84721                                                   | 2.00983                                         |
| 5.000→6.125           | 5.72471                           | 8.85204                           | 3.12733                                                   | 2.18665                                         |
| 5.000→6.250           | 5.72471                           | 9.11806                           | 3.39335                                                   | 2.34908                                         |
| 5.000→6.375           | 5.72471                           | 9.37069                           | 3.64598                                                   | 2.49772                                         |
| 5.000→6.500           | 5.72471                           | 9.6106                            | 3.88589                                                   | 2.63312                                         |
| 5.000→6.625           | 5.72471                           | 9.83844                           | 4.11373                                                   | 2.7558                                          |
| 5.000→6.750           | 5.72471                           | 10.0548                           | 4.33009                                                   | 2.86628                                         |
| 5.000→6.875           | 5.72471                           | 10.26028                          | 4.53557                                                   | 2.96506                                         |
| 5.000→7.000           | 5.72471                           | 10.45541                          | 4.7307                                                    | 3.05259                                         |
| 5.000→7.125           | 5.72471                           | 10.64071                          | 4.91601                                                   | 3.12934                                         |
| 5.000→7.250           | 5.72471                           | 10.81669                          | 5.09198                                                   | 3.19573                                         |
| 5.000→7.375           | 5.72471                           | 10.98381                          | 5.2591                                                    | 3.25219                                         |
| 5.000→7.500           | 5.72471                           | 11.14252                          | 5.41781                                                   | 3.29911                                         |

**Table S20** The calculated data from Fig. 9b for linear fitting of  $k_3''$  (at 130 °C) in Fig. 10b.

| $t_1 \rightarrow t_2$ | $[\mathbf{5a}]_{t_1} \times 10^3$ | $[\mathbf{5a}]_{t_2} \times 10^3$ | $([\mathbf{5a}]_{t_2} - [\mathbf{5a}]_{t_1}) \times 10^3$ | $\mathbf{4a}_{t_1 \rightarrow t_2} \times 10^3$ |
|-----------------------|-----------------------------------|-----------------------------------|-----------------------------------------------------------|-------------------------------------------------|
| [h]                   | [M]                               | [M]                               | [M]                                                       | [M h]                                           |
| 4.000→4.075           | 11.40206                          | 11.74619                          | 0.34413                                                   | 0.16081                                         |
| 4.000→4.150           | 11.40206                          | 12.07291                          | 0.67085                                                   | 0.31325                                         |
| 4.000→4.225           | 11.40206                          | 12.3831                           | 0.98104                                                   | 0.45751                                         |
| 4.000→4.300           | 11.40206                          | 12.6776                           | 1.27554                                                   | 0.59381                                         |
| 4.000→4.375           | 11.40206                          | 12.9572                           | 1.55514                                                   | 0.72234                                         |
| 4.000→4.450           | 11.40206                          | 13.22265                          | 1.82059                                                   | 0.8433                                          |
| 4.000→4.525           | 11.40206                          | 13.47467                          | 2.07261                                                   | 0.95686                                         |
| 4.000→4.600           | 11.40206                          | 13.71394                          | 2.31188                                                   | 1.06321                                         |
| 4.000→4.675           | 11.40206                          | 13.94111                          | 2.53905                                                   | 1.16253                                         |
| 4.000→4.750           | 11.40206                          | 14.15679                          | 2.75473                                                   | 1.255                                           |
| 4.000→4.825           | 11.40206                          | 14.36155                          | 2.95949                                                   | 1.34078                                         |
| 4.000→4.900           | 11.40206                          | 14.55595                          | 3.15389                                                   | 1.42003                                         |
| 4.000→4.975           | 11.40206                          | 14.74052                          | 3.33846                                                   | 1.49293                                         |
| 4.000→5.050           | 11.40206                          | 14.91575                          | 3.51369                                                   | 1.55962                                         |
| 4.000→5.125           | 11.40206                          | 15.08211                          | 3.68005                                                   | 1.62026                                         |
| 4.000→5.200           | 11.40206                          | 15.24006                          | 3.838                                                     | 1.67501                                         |
| 4.000→5.275           | 11.40206                          | 15.39002                          | 3.98796                                                   | 1.72399                                         |
| 4.000→5.350           | 11.40206                          | 15.53239                          | 4.13033                                                   | 1.76737                                         |
| 4.000→5.425           | 11.40206                          | 15.66755                          | 4.26549                                                   | 1.80527                                         |
| 4.000→5.500           | 11.40206                          | 15.79588                          | 4.39382                                                   | 1.83783                                         |

**Table S21** The calculated data from Fig. 9a for linear fitting of  $k_3''$  (at 140 °C) in Fig. 10b.

| $t_1 \rightarrow t_2$ | $[\mathbf{5a}]_{t_1} \times 10^3$ | $[\mathbf{5a}]_{t_2} \times 10^3$ | $([\mathbf{5a}]_{t_2} - [\mathbf{5a}]_{t_1}) \times 10^3$ | $\mathbf{4a}_{t_1 \rightarrow t_2} \times 10^3$ |
|-----------------------|-----------------------------------|-----------------------------------|-----------------------------------------------------------|-------------------------------------------------|
| [h]                   | [M]                               | [M]                               | [M]                                                       | [M h]                                           |
| 0.500→0.550           | 0.50057                           | 0.90524                           | 0.40467                                                   | 0.14761                                         |
| 0.500→0.600           | 0.50057                           | 1.30094                           | 0.80037                                                   | 0.2904                                          |
| 0.500→0.650           | 0.50057                           | 1.68789                           | 1.18732                                                   | 0.42834                                         |
| 0.500→0.700           | 0.50057                           | 2.06627                           | 1.5657                                                    | 0.56137                                         |
| 0.500→0.750           | 0.50057                           | 2.43627                           | 1.9357                                                    | 0.68945                                         |
| 0.500→0.800           | 0.50057                           | 2.79808                           | 2.29751                                                   | 0.81254                                         |
| 0.500→0.850           | 0.50057                           | 3.15188                           | 2.65131                                                   | 0.93058                                         |
| 0.500→0.900           | 0.50057                           | 3.49785                           | 2.99728                                                   | 1.04352                                         |
| 0.500→0.950           | 0.50057                           | 3.83616                           | 3.33559                                                   | 1.15132                                         |
| 0.500→1.000           | 0.50057                           | 4.16698                           | 3.66641                                                   | 1.25393                                         |
| 0.500→1.05            | 0.50057                           | 4.49047                           | 3.9899                                                    | 1.3513                                          |
| 0.500→1.100           | 0.50057                           | 4.8068                            | 4.30623                                                   | 1.44337                                         |
| 0.500→1.150           | 0.50057                           | 5.11613                           | 4.61556                                                   | 1.5301                                          |
| 0.500→1.200           | 0.50057                           | 5.41861                           | 4.91804                                                   | 1.61144                                         |
| 0.500→1.250           | 0.50057                           | 5.7144                            | 5.21383                                                   | 1.68733                                         |
| 0.500→1.300           | 0.50057                           | 6.00363                           | 5.50306                                                   | 1.75772                                         |
| 0.500→1.350           | 0.50057                           | 6.28647                           | 5.7859                                                    | 1.82257                                         |
| 0.500→1.400           | 0.50057                           | 6.56304                           | 6.06247                                                   | 1.8818                                          |
| 0.500→1.450           | 0.50057                           | 6.83349                           | 6.33291                                                   | 1.93539                                         |
| 0.500→1.500           | 0.50057                           | 7.09795                           | 6.59738                                                   | 1.98325                                         |

## S2.2. Supplementary Schemes and Figs.

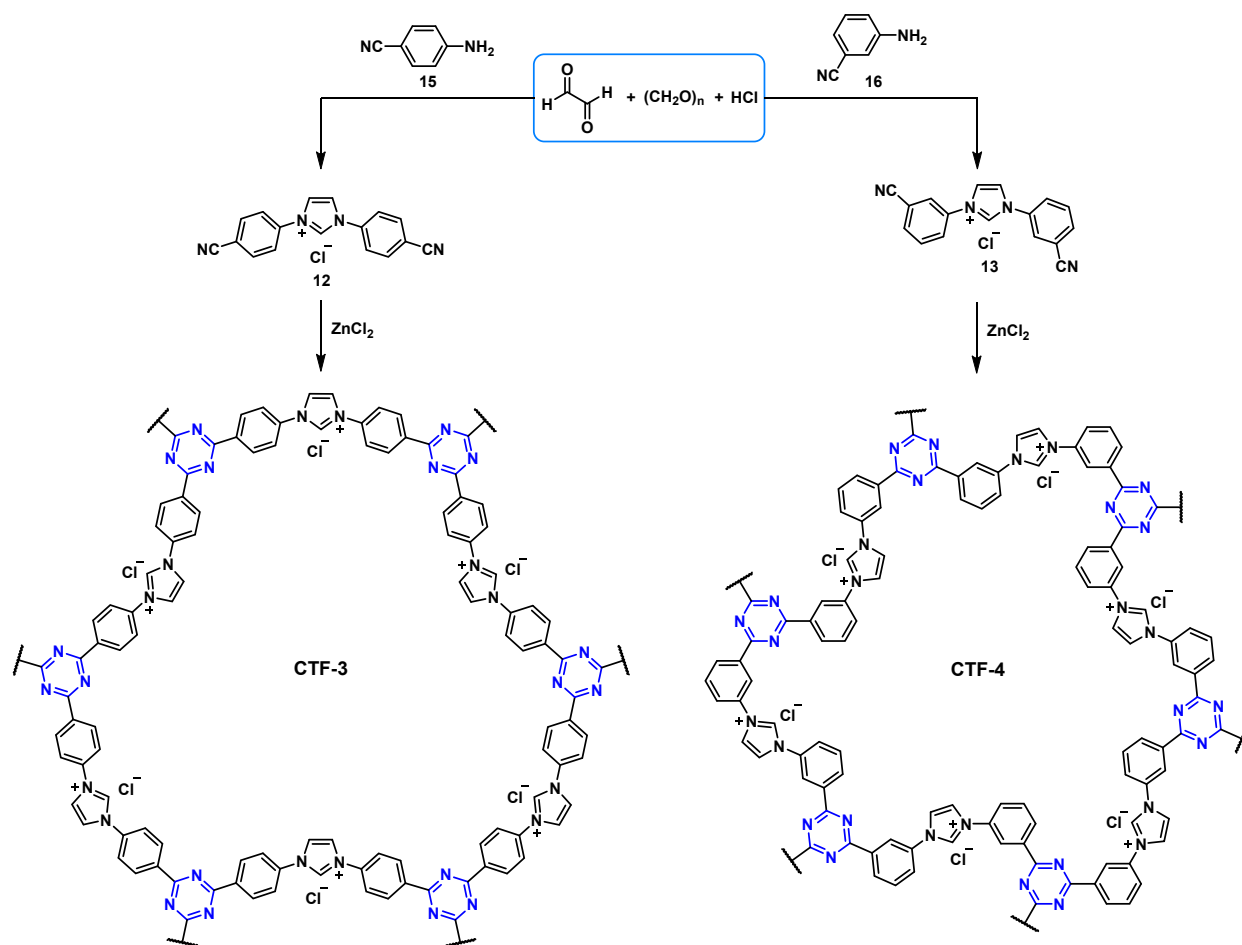

Scheme S1 Synthetic route to CTF-3 and CTF-4

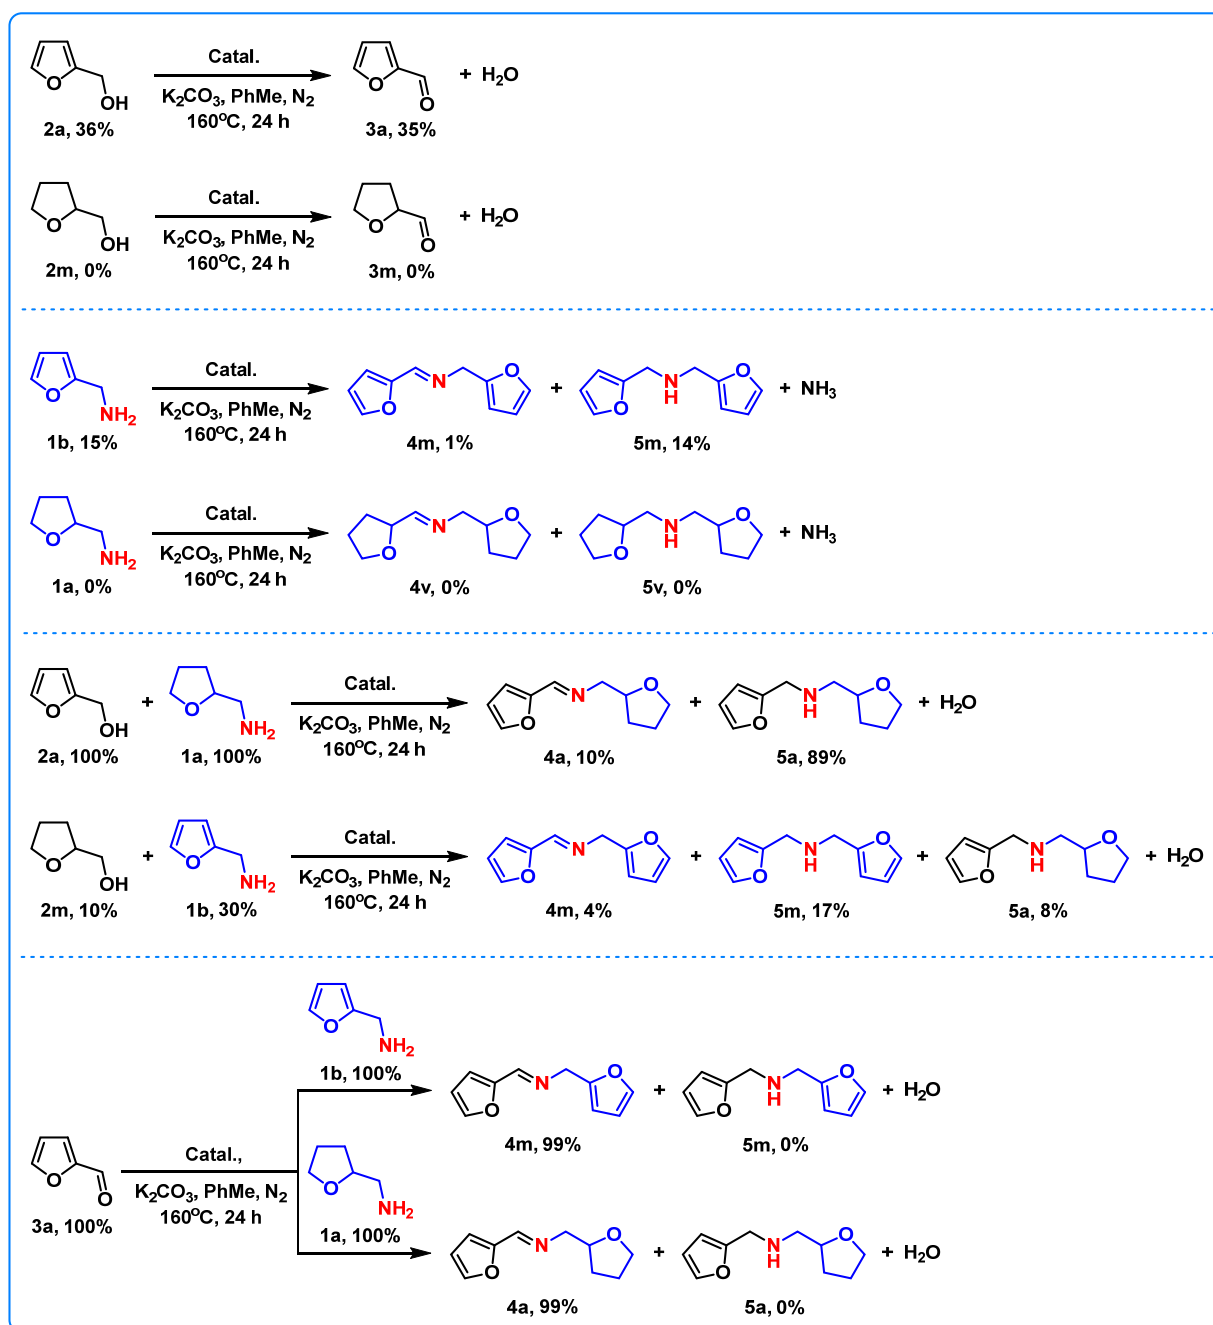

**Scheme S2** Control experiments. Reaction conditions: 1.8%-Ir/CTF-1 (15 mg),  $\text{K}_2\text{CO}_3$  (26 mg, 0.19 mmol), PhMe (2.0 mL),  $P_{\text{N}_2}$  (1.0 MPa), 160 °C, 24 h, **1a**, **1b**, **2a**, **2m** and **3a** (0.1 mmol).

$$\frac{d[2\mathbf{a}]}{dt} = -k_1[2\mathbf{a}][\text{Cat}] + k_{-1}[3\mathbf{a}][\text{Cat} \cdot \text{H}_2] \quad (8)$$

$$\frac{d[1\mathbf{a}]}{dt} = -k_2[3\mathbf{a}][1\mathbf{a}] + k_{-2}[4\mathbf{a}][\text{H}_2\text{O}] \quad (9)$$

$$\frac{d[3\mathbf{a}]}{dt} = +k_1[2\mathbf{a}][\text{Cat}] - k_{-1}[3\mathbf{a}][\text{Cat} \cdot \text{H}_2] - k_2[3\mathbf{a}][1\mathbf{a}] + k_{-2}[4\mathbf{a}][\text{H}_2\text{O}] \quad (10)$$

$$\frac{d[4\mathbf{a}]}{dt} = +k_2[3\mathbf{a}][1\mathbf{a}] - k_{-2}[4\mathbf{a}][\text{H}_2\text{O}] - k_3[4\mathbf{a}][\text{Cat} \cdot \text{H}_2] + k_{-3}[5\mathbf{a}][\text{Cat}] \quad (11)$$

$$\frac{d[5\mathbf{a}]}{dt} = +k_3[4\mathbf{a}][\text{Cat} \cdot \text{H}_2] - k_{-3}[5\mathbf{a}][\text{Cat}] \quad (12)$$

$$[\text{Cat}]_0 = [\text{Cat}] + [\text{Cat} \cdot \text{H}_2] \quad (13)$$

$$\frac{d[2\mathbf{a}]}{dt} = -k'_1[2\mathbf{a}] + k'_{-1}[3\mathbf{a}] \quad (14)$$

$$\frac{d[3\mathbf{a}]}{dt} = +k'_1[2\mathbf{a}] - k'_{-1}[3\mathbf{a}] - k_2[3\mathbf{a}][1\mathbf{a}] + k_{-2}[4\mathbf{a}][\text{H}_2\text{O}] \quad (15)$$

$$\frac{d[4\mathbf{a}]}{dt} = +k_2[3\mathbf{a}][1\mathbf{a}] - k_{-2}[4\mathbf{a}][\text{H}_2\text{O}] - k'_3[4\mathbf{a}] + k'_{-3}[5\mathbf{a}] \quad (16)$$

$$\frac{d[5\mathbf{a}]}{dt} = +k'_3[4\mathbf{a}] - k'_{-3}[5\mathbf{a}] \quad (17)$$

$$k'_1 = k_1[\text{Cat}] \quad (18)$$

$$k'_{-1} = k_{-1}[\text{Cat} \cdot \text{H}_2] \quad (19)$$

$$k'_3 = k_3[\text{Cat} \cdot \text{H}_2] \quad (20)$$

$$k'_{-3} = k_{-3}[\text{Cat}] \quad (21)$$

$$r_{2\mathbf{a}} = -\left(\frac{d[2\mathbf{a}]}{dt}\right) = +k'_1[2\mathbf{a}] \quad (22)$$

$$\frac{d[3\mathbf{a}]}{dt} = +k'_1[2\mathbf{a}] - k_2[3\mathbf{a}][1\mathbf{a}] + k_{-2}[4\mathbf{a}][\text{H}_2\text{O}] = 0 \quad (23)$$

$$r_{3\mathbf{a}} = \frac{d[3\mathbf{a}]}{dt} = -\left(\frac{d[2\mathbf{a}]}{dt}\right) + \left(\frac{d[1\mathbf{a}]}{dt}\right) = r_{2\mathbf{a}} - r_{1\mathbf{a}} = 0 \quad (24)$$

$$r_{1\mathbf{a}} = r_{2\mathbf{a}} \quad (25)$$

$$r_1 = r_{2\mathbf{a}} = +k'_1[2\mathbf{a}] \quad (26)$$

$$r_2 = r_{1\mathbf{a}} = r_{2\mathbf{a}} = +k'_1[2\mathbf{a}] \quad (27)$$

$$r_3 = +k'_3[4\mathbf{a}] \quad (28)$$

$$r_{-3} = +k'_{-3}[5\mathbf{a}] \quad (29)$$

$$\mathbf{G}_{t_1 \rightarrow t_2} = \int_{t_1}^{t_2} [\mathbf{G}] dt \quad (30)$$

$$\int_{[2\mathbf{a}]_{t_1}}^{[2\mathbf{a}]_{t_2}} d[2\mathbf{a}] = -k'_1 \int_{t_1}^{t_2} [2\mathbf{a}] dt \quad (31)$$

$$\int_{[2\mathbf{a}]_{t_1}}^{[2\mathbf{a}]_{t_2}} \frac{d[2\mathbf{a}]}{[2\mathbf{a}]} = -k'_1 \int_{t_1}^{t_2} dt \quad (32)$$

$$\ln\left(\frac{[\mathbf{2a}]_{t_1}}{[\mathbf{2a}]_{t_2}}\right) = k'_1(t_2 - t_1) \quad (33)$$

$$k'_1 = \frac{\ln\left(\frac{[\mathbf{2a}]_{t_1}}{[\mathbf{2a}]_{t_2}}\right)}{t_2 - t_1} \quad (34)$$

$$\int_{[\mathbf{5a}]_{t_1}}^{[\mathbf{5a}]_{t_2}} d[\mathbf{5a}] = +k'_3 \int_{t_1}^{t_2} [\mathbf{4a}] dt - k'_{-3} \int_{t_1}^{t_2} [\mathbf{5a}] dt \quad (35)$$

$$[\mathbf{5a}]_{t_2} - [\mathbf{5a}]_{t_1} = +k'_3 \mathbf{4a}_{t_1 \rightarrow t_2} - k'_{-3} \mathbf{5a}_{t_1 \rightarrow t_2} \quad (36)$$

$$[\mathbf{5a}]_{t_3} - [\mathbf{5a}]_{t_1} = +k'_3 \mathbf{4a}_{t_1 \rightarrow t_3} - k'_{-3} \mathbf{5a}_{t_1 \rightarrow t_3} \quad (37)$$

$$k'_3 = \frac{\mathbf{5a}_{t_1 \rightarrow t_3}([\mathbf{5a}]_{t_2} - [\mathbf{5a}]_{t_1}) - \mathbf{5a}_{t_1 \rightarrow t_2}([\mathbf{5a}]_{t_3} - [\mathbf{5a}]_{t_1})}{\mathbf{4a}_{t_1 \rightarrow t_2} \mathbf{5a}_{t_1 \rightarrow t_3} - \mathbf{4a}_{t_1 \rightarrow t_3} \mathbf{5a}_{t_1 \rightarrow t_2}} = \frac{\mathbf{H}}{\mathbf{I}} \quad (38)$$

$$k'_{-3} = \frac{([\mathbf{5a}]_{t_1} - [\mathbf{5a}]_{t_2}) + k'_3 \mathbf{4a}_{t_1 \rightarrow t_2}}{\mathbf{5a}_{t_1 \rightarrow t_2}} = \frac{\mathbf{J}}{\mathbf{5a}_{t_1 \rightarrow t_2}} \quad (39)$$

$$k''_1 = \frac{\ln\left(\frac{[\mathbf{2a}]_{t_1}}{[\mathbf{2a}]_{t_2}}\right)}{t_2 - t_1} \quad (40)$$

$$\int_{[\mathbf{5a}]_{t_1}}^{[\mathbf{5a}]_{t_2}} d[\mathbf{5a}] = +k''_3 \int_{t_1}^{t_2} [\mathbf{4a}] dt \quad (41)$$

$$k''_3 = \frac{[\mathbf{5a}]_{t_2} - [\mathbf{5a}]_{t_1}}{\mathbf{4a}_{t_1 \rightarrow t_2}} \quad (42)$$

$$\frac{d[\mathbf{4a}]}{dt} = +k_2[\mathbf{3a}][\mathbf{1a}] - k_{-2}[\mathbf{4a}][\mathbf{H}_2\mathbf{O}] - k''_3[\mathbf{4a}] + k'_{-3}[\mathbf{5a}] = 0 \quad (43)$$

$$\frac{d[\mathbf{4a}]}{dt} = -\left(\frac{d[\mathbf{1a}]}{dt}\right) - \left(\frac{d[\mathbf{5a}]}{dt}\right) = r_{1a} - r_{5a} = 0 \quad (44)$$

$$r_{1a} = r_{5a} \quad (45)$$

**Scheme S3** Kinetic equations for **1a/2a-to-5a** *N*-alkylation

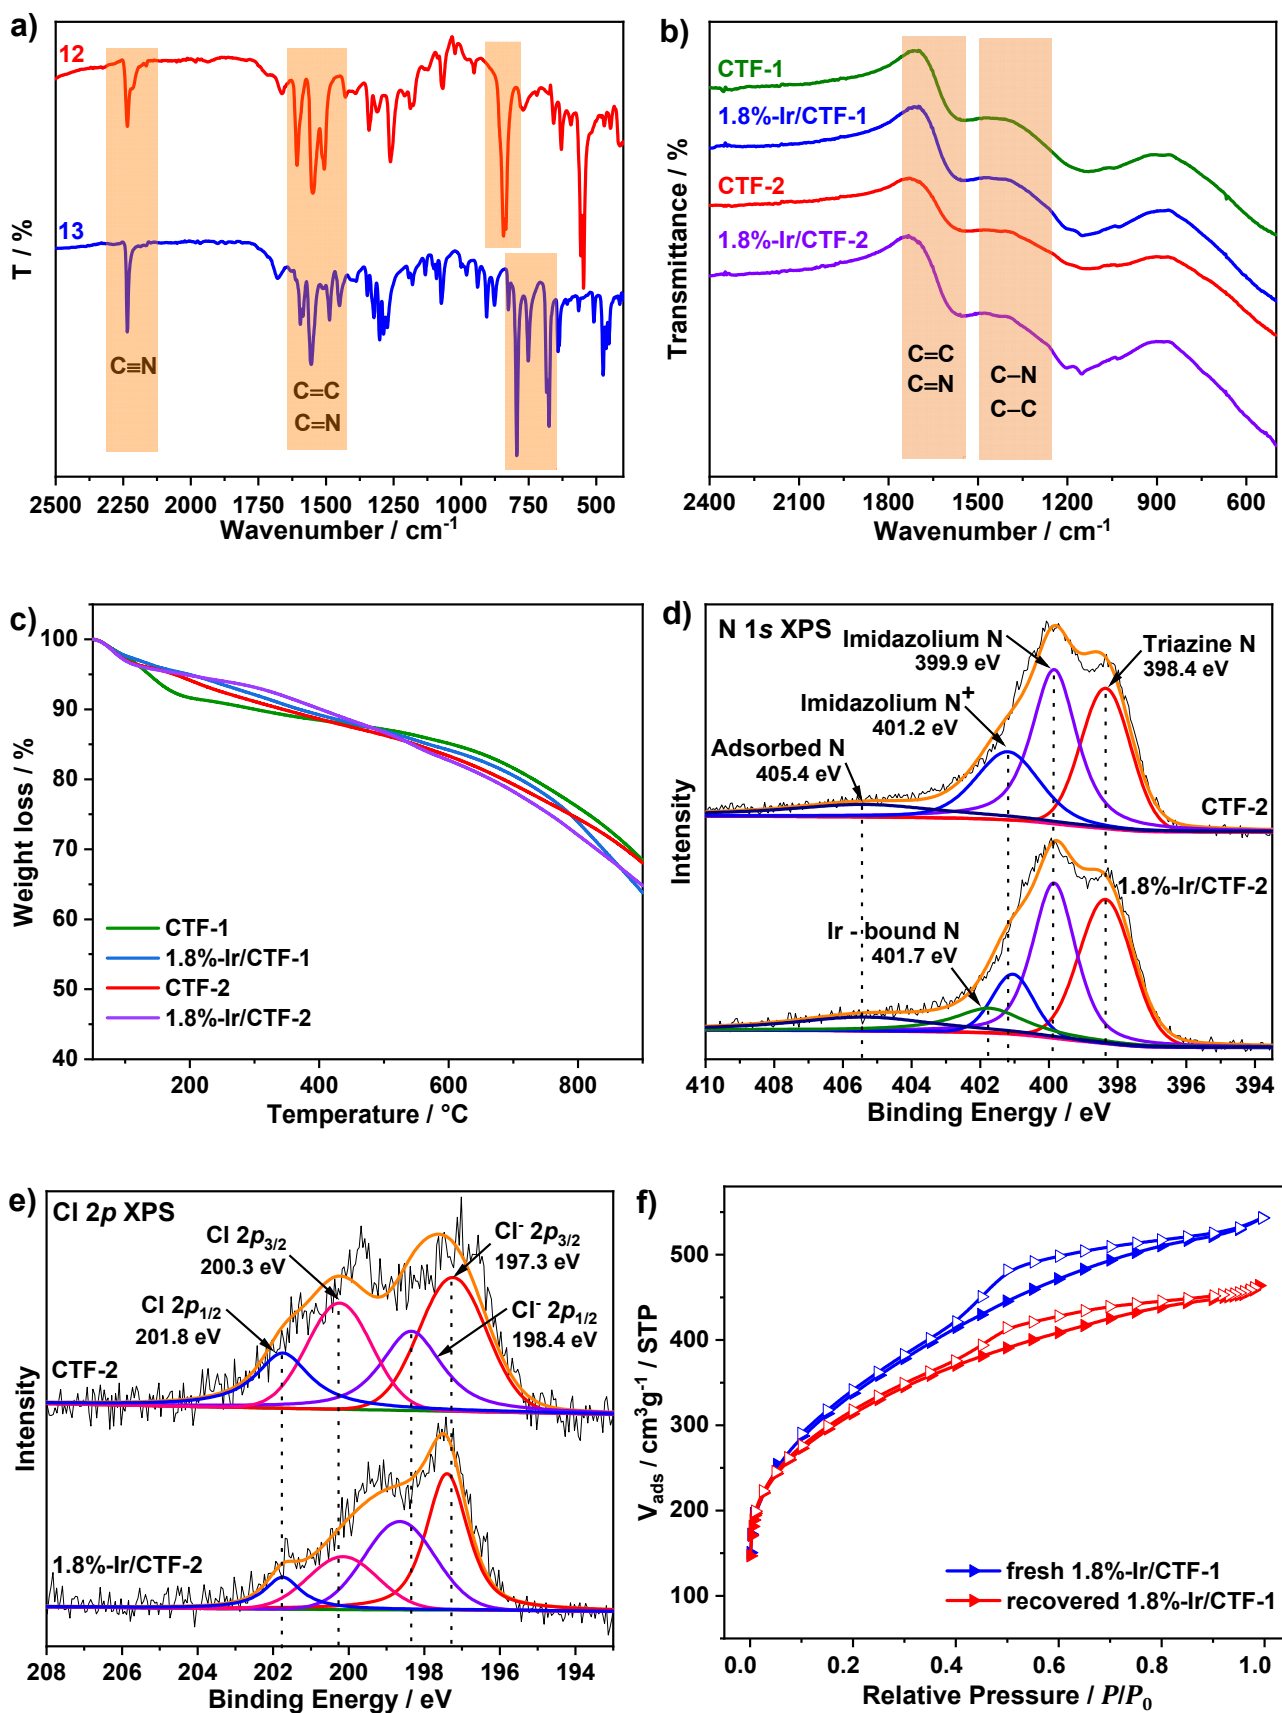

**Fig. S1** (a) IR spectra of 12 and 13. CTF and Ir/CTF serial samples: (b) IR spectra, (c) TGA plots. CTF-2 and 1.8%-Ir/CTF-2: (d) N 1s XPS, (e) Cl 2p XPS. (f) Nitrogen sorption isotherms of fresh and recovered 1.8%-Ir/CTF-1.



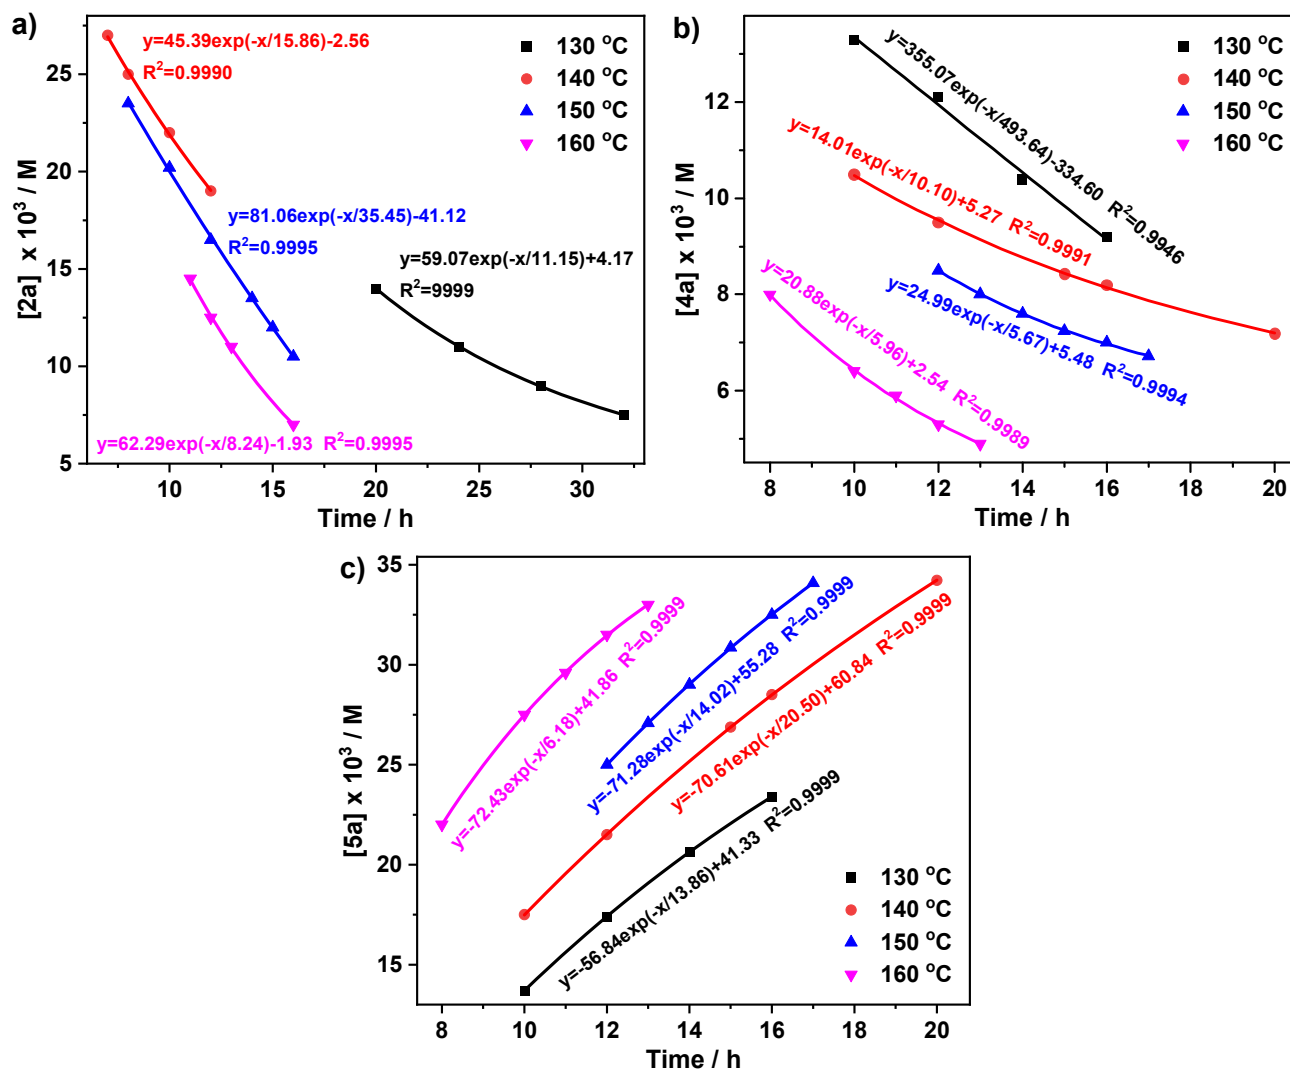

**Fig. S2** Nonlinear fittings of concentration–time curves at the specified reaction-time intervals (corresponding to Fig. 6 and Tables S2–13): (a) [2a]~*t*, (b) [4a]~*t*, (c) [5a]~*t*. Reaction conditions: 1.8%-Ir/CTF-1 (15 mg, 1.4 mol% Ir relative to 2a), 1a (10 mg, 0.10 mmol), 2a (10 mg, 0.10 mmol), K<sub>2</sub>CO<sub>3</sub> (26 mg, 0.19 mmol), PhMe (2 mL), P<sub>N<sub>2</sub></sub> (1.0 MPa), specified reaction temperature.

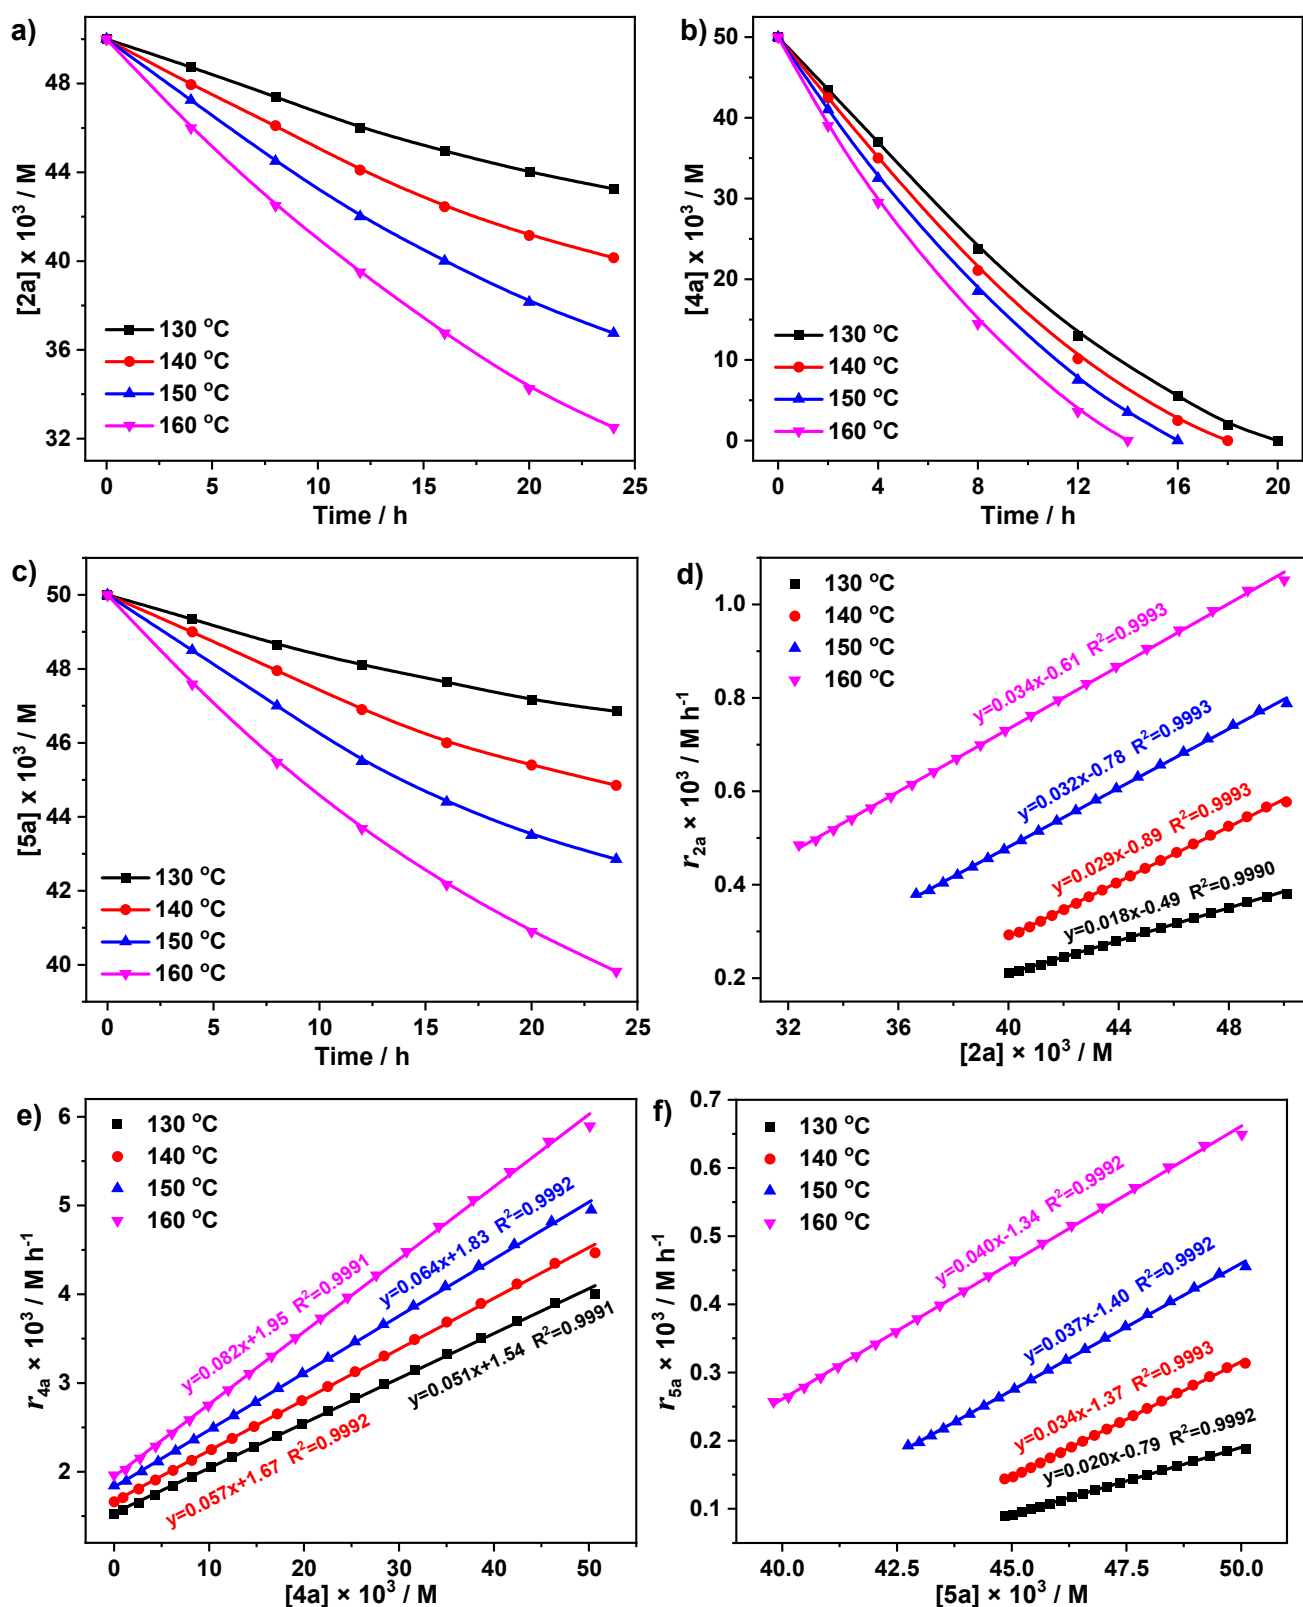

**Fig. S3** The concentration–time curves at the specified reaction-time intervals: (a)  $[2a] \sim t$ , (b)  $[4a] \sim t$ , (c)  $[5a] \sim t$ . And plots of: (d)  $r_{2a}$  against  $[2a]$ , (e)  $r_{4a}$  against  $[4a]$ , (f)  $r_{5a}$  against  $[5a]$ . Reaction conditions: 1.8%-Ir/CTF-1 (15 mg),  $K_2CO_3$  (26 mg, 0.19 mmol), PhMe (2.0 mL),  $P_{N_2}$  (1.0 MPa),  $[2a]$  (0.10 mmol) for panel (a)],  $[4a]$  (0.10 mmol) and HCOONa (17 mg, 0.25 mmol) for panel (b)],  $[5a]$  (0.10 mmol) for panel (c)].

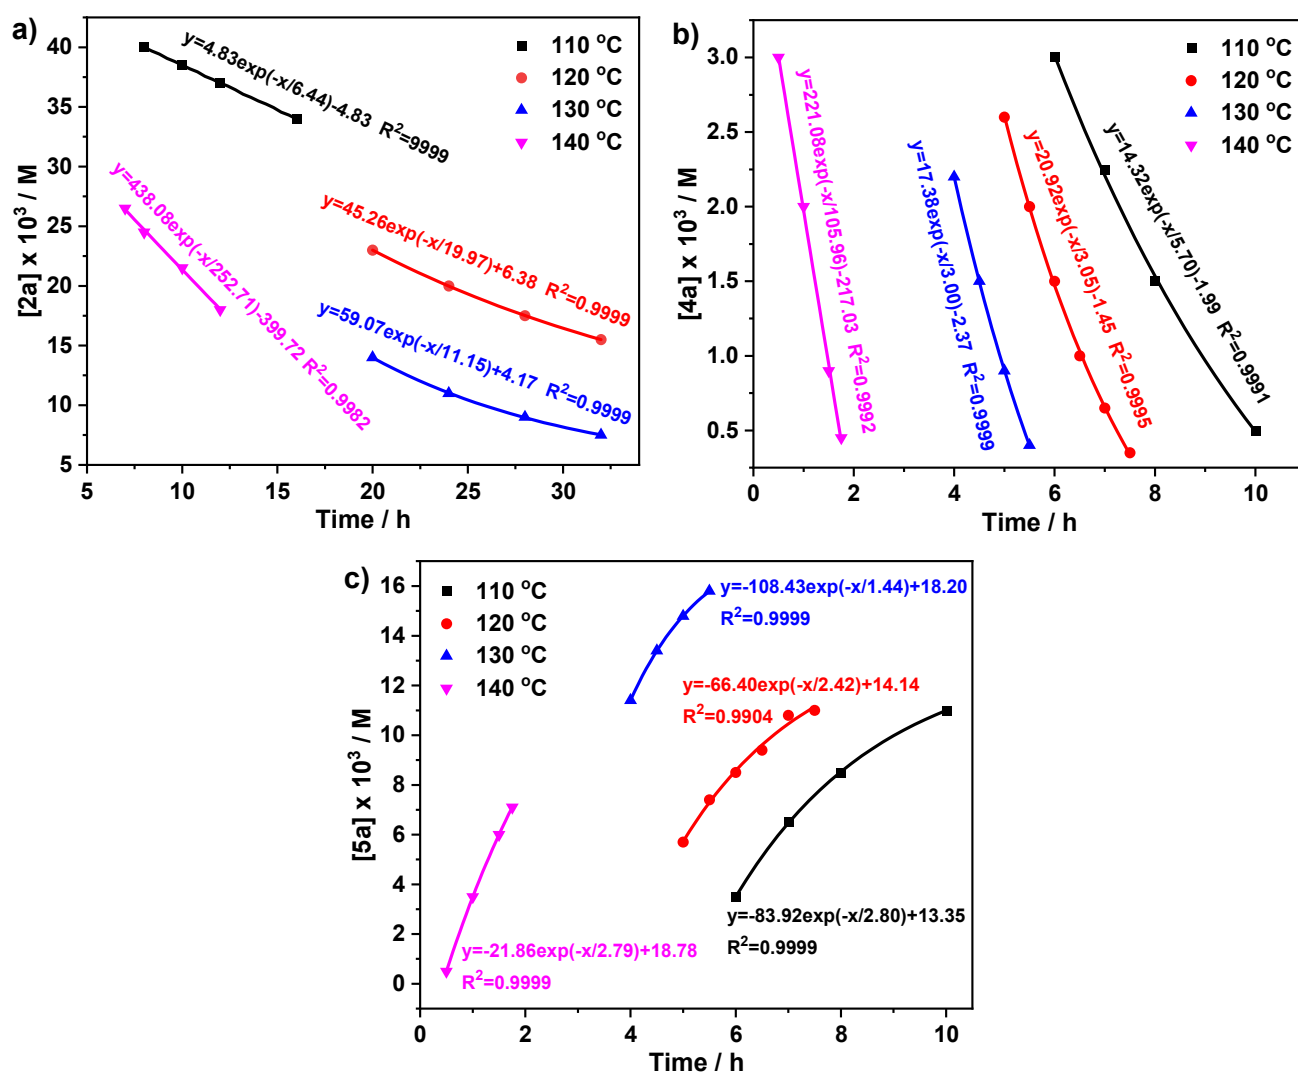

**Fig. S4** Nonlinear fittings of concentration–time curves at the specified reaction–time intervals (corresponding to Fig. 9 and Tables S14–21): (a)  $[2a] \sim t$ , (b)  $[4a] \sim t$ , (c)  $[5a] \sim t$ . Reaction conditions: 1.8%–Ir/CTF-1 (15 mg, 1.4 mol% Ir relative to **2a**), **1a** (10 mg, 0.10 mmol), **2a** (10 mg, 0.10 mmol),  $K_2CO_3$  (26 mg, 0.19 mmol),  $HCOONa$  (17 mg, 0.25 mmol), PhMe (2.0 mL),  $P_{N_2}$  (1.0 MPa), specified reaction temperature.

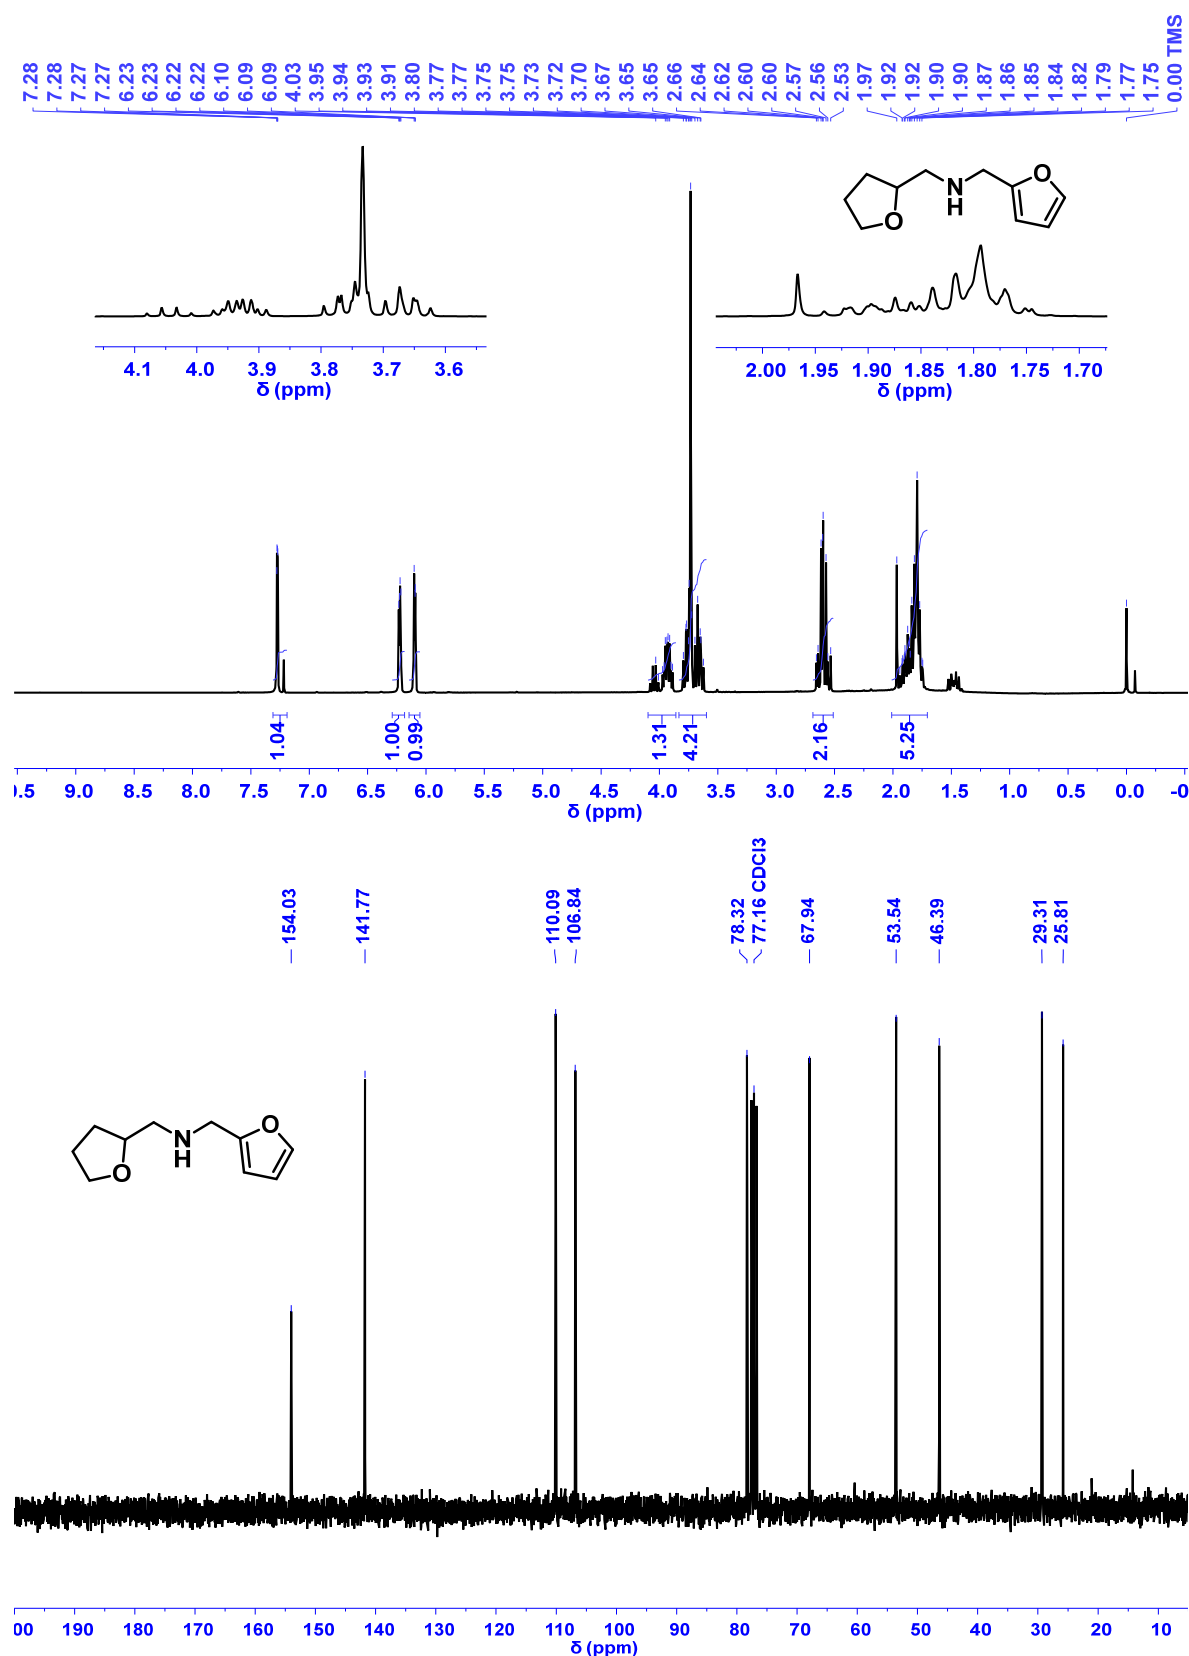

**Fig. S5**  $^1\text{H}$  and  $^{13}\text{C}$   $\{^1\text{H}\}$  NMR of *N*-[(tetrahydro-2-furyl)methyl]-2-furanmethanamine **5a**.  $^1\text{H}$  NMR (300 MHz,  $\text{CDCl}_3$ )  $\delta$  7.27 (dd,  $J = 1.8, 0.8$  Hz, 1H), 6.22 (dd,  $J = 3.1, 1.9$  Hz, 1H), 6.18 – 6.05 (m, 1H), 4.11 – 3.86 (m, 1H), 3.86 – 3.60 (m, 4H), 2.69 – 2.51 (m, 2H), 1.99 – 1.72 (m, 5H).  $^{13}\text{C}$   $\{^1\text{H}\}$  NMR (75 MHz,  $\text{CDCl}_3$ )  $\delta$  154.03, 141.77, 110.09, 106.84, 78.32, 67.94, 53.54, 46.39, 29.31, 25.81.

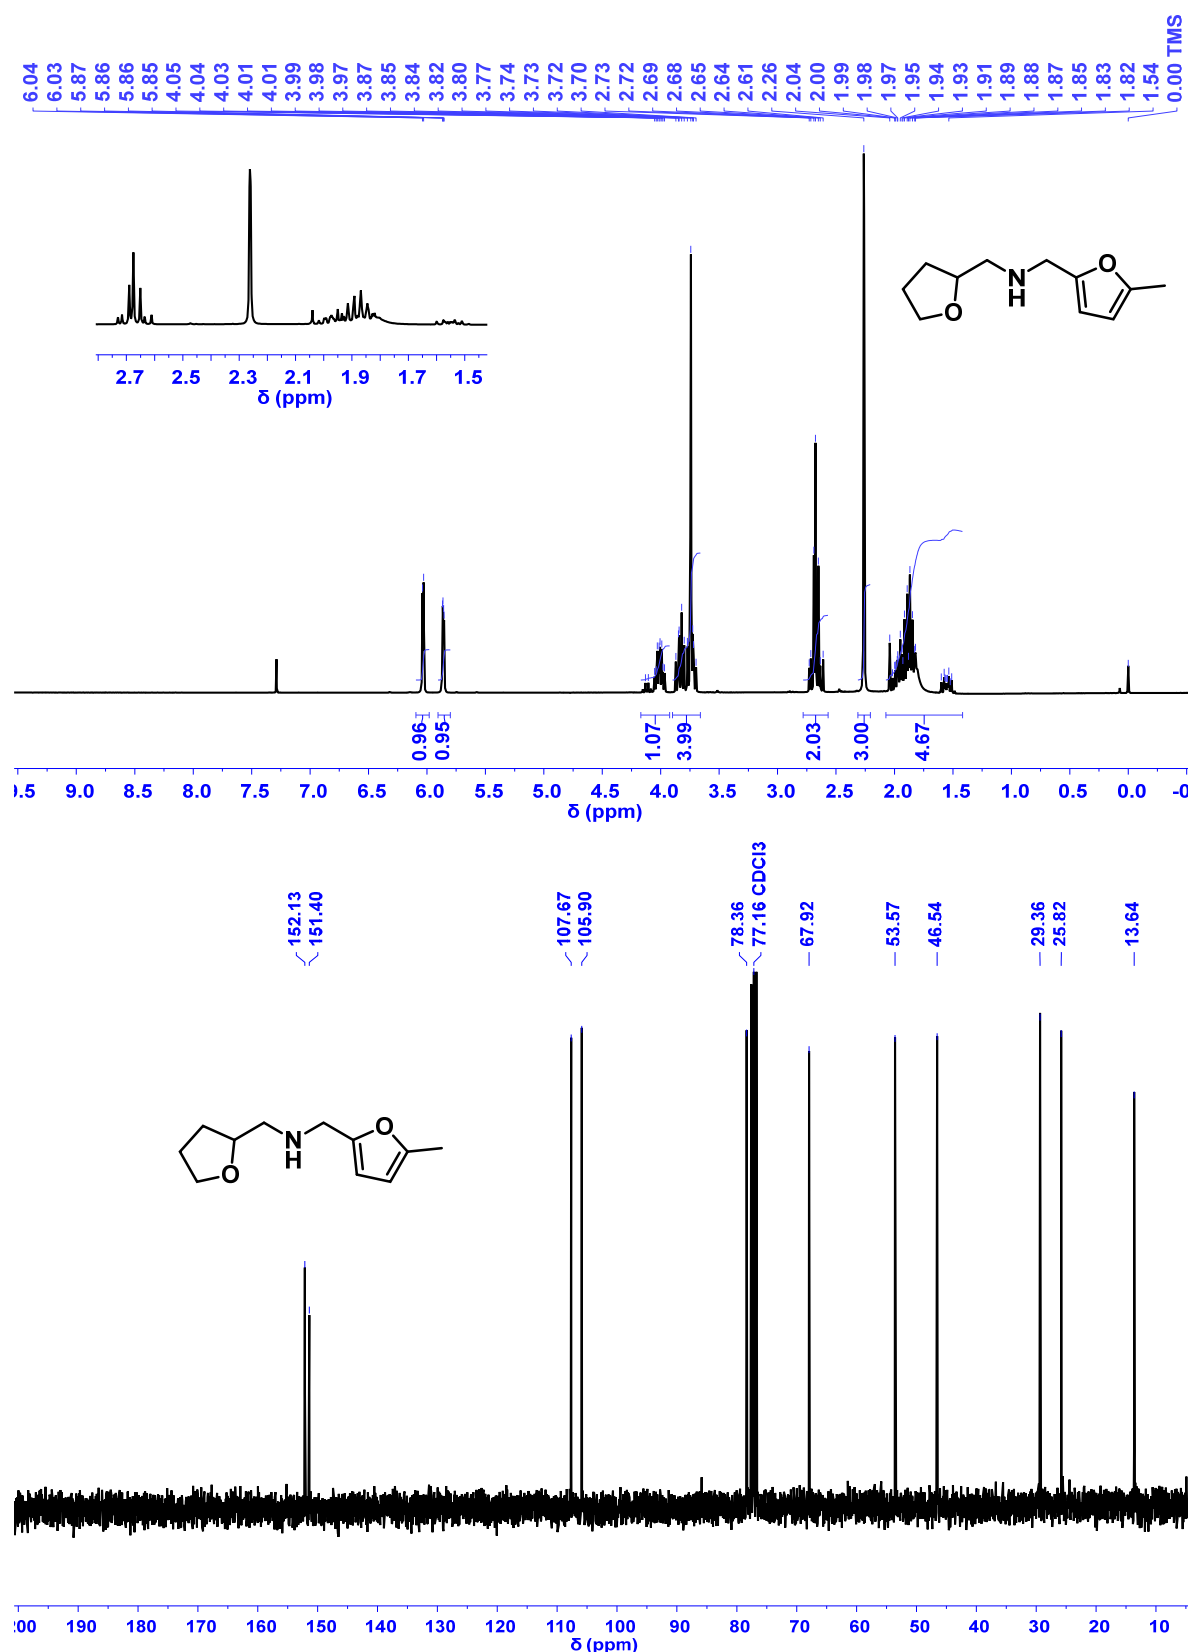

**Fig. S6**  $^1\text{H}$  and  $^{13}\text{C}$   $\{^1\text{H}\}$  NMR of 5-Methyl-N-[(tetrahydro-2-furanyl)methyl]-2-furanmethanamine **5b**.  $^1\text{H}$  NMR (300 MHz,  $\text{CDCl}_3$ )  $\delta$  6.03 (d,  $J = 3.0$  Hz, 1H), 5.86 (dd,  $J = 3.0, 1.0$  Hz, 1H), 4.17 – 3.92 (m, 1H), 3.90 – 3.66 (m, 4H), 2.78 – 2.57 (m, 2H), 2.26 (s, 3H), 2.07 – 1.42 (m, 5H).  $^{13}\text{C}$   $\{^1\text{H}\}$  NMR (75 MHz,  $\text{CDCl}_3$ )  $\delta$  152.13, 151.40, 107.67, 105.90, 78.36, 67.92, 53.57, 46.54, 29.36, 25.82, 13.64.

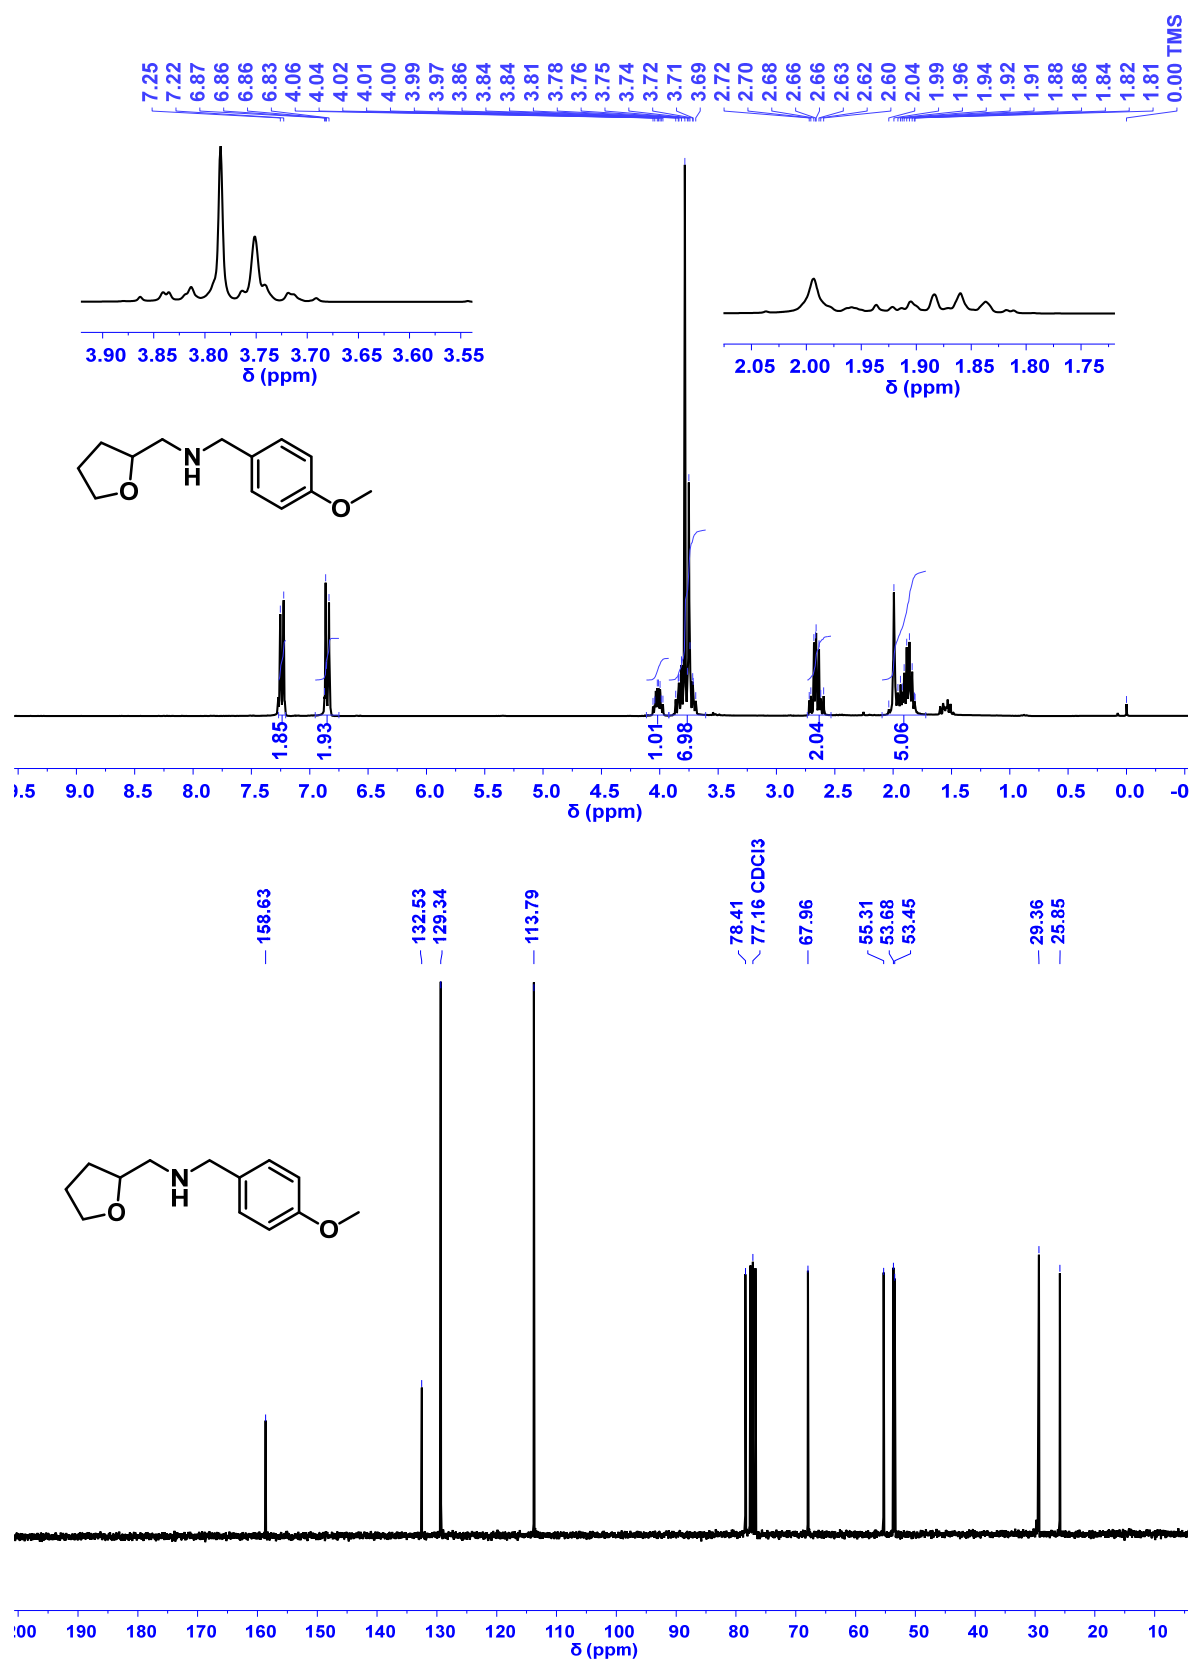

**Fig. S7**  $^1\text{H}$  and  $^{13}\text{C}$   $\{^1\text{H}\}$  NMR of tetrahydro-*N*-[(4-methoxyphenyl)methyl]-2-furanmethanamine **5c**.  $^1\text{H}$  NMR (300 MHz,  $\text{CDCl}_3$ )  $\delta$  7.24 (d,  $J = 8.5$  Hz, 2H), 6.95 – 6.75 (m, 2H), 4.01 (tt,  $J = 7.3, 4.2$  Hz, 1H), 3.92 – 3.61 (m, 7H), 2.74 – 2.53 (m, 2H), 2.10 – 1.72 (m, 5H).  $^{13}\text{C}$   $\{^1\text{H}\}$  NMR (75 MHz,  $\text{CDCl}_3$ )  $\delta$  158.63, 132.53, 129.34, 113.79, 78.41, 67.96, 55.31, 53.68, 53.45, 29.36, 25.85.

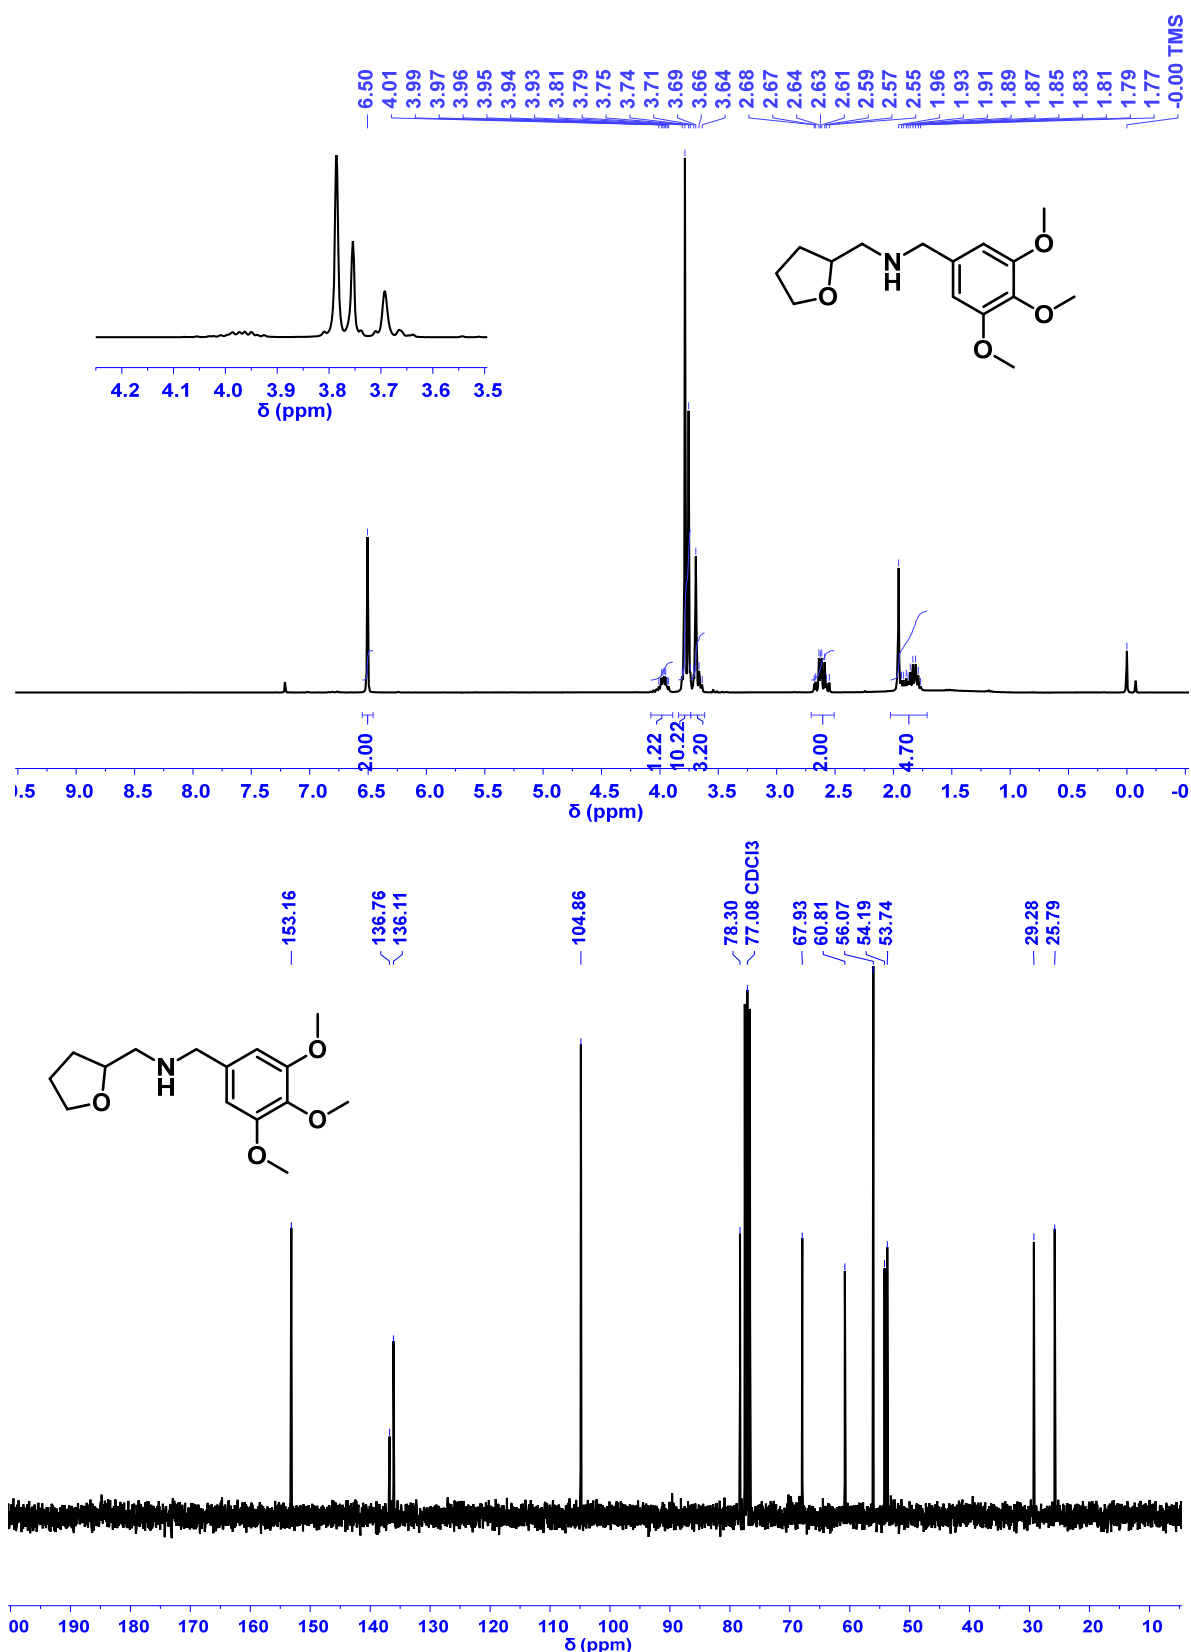

**Fig. S8**  $^1\text{H}$  and  $^{13}\text{C}$   $\{^1\text{H}\}$  NMR of tetrahydro-*N*-[(3,4,5-trimethoxyphenyl)methyl]-2-furanmethanamine **5d**.  $^1\text{H}$  NMR (300 MHz,  $\text{CDCl}_3$ )  $\delta$  6.50 (s, 2H), 3.96 (td,  $J = 7.2, 4.0$  Hz, 1H), 3.77 (d,  $J = 9.5$  Hz, 10H), 3.68 (d,  $J = 8.4$  Hz, 3H), 2.70 – 2.51 (m, 2H), 2.02 – 1.71 (m, 5H).  $^{13}\text{C}$   $\{^1\text{H}\}$  NMR (75 MHz,  $\text{CDCl}_3$ )  $\delta$  153.16, 136.76, 136.11, 104.86, 78.30, 67.93, 60.81, 56.07, 54.19, 53.74, 29.28, 25.79.

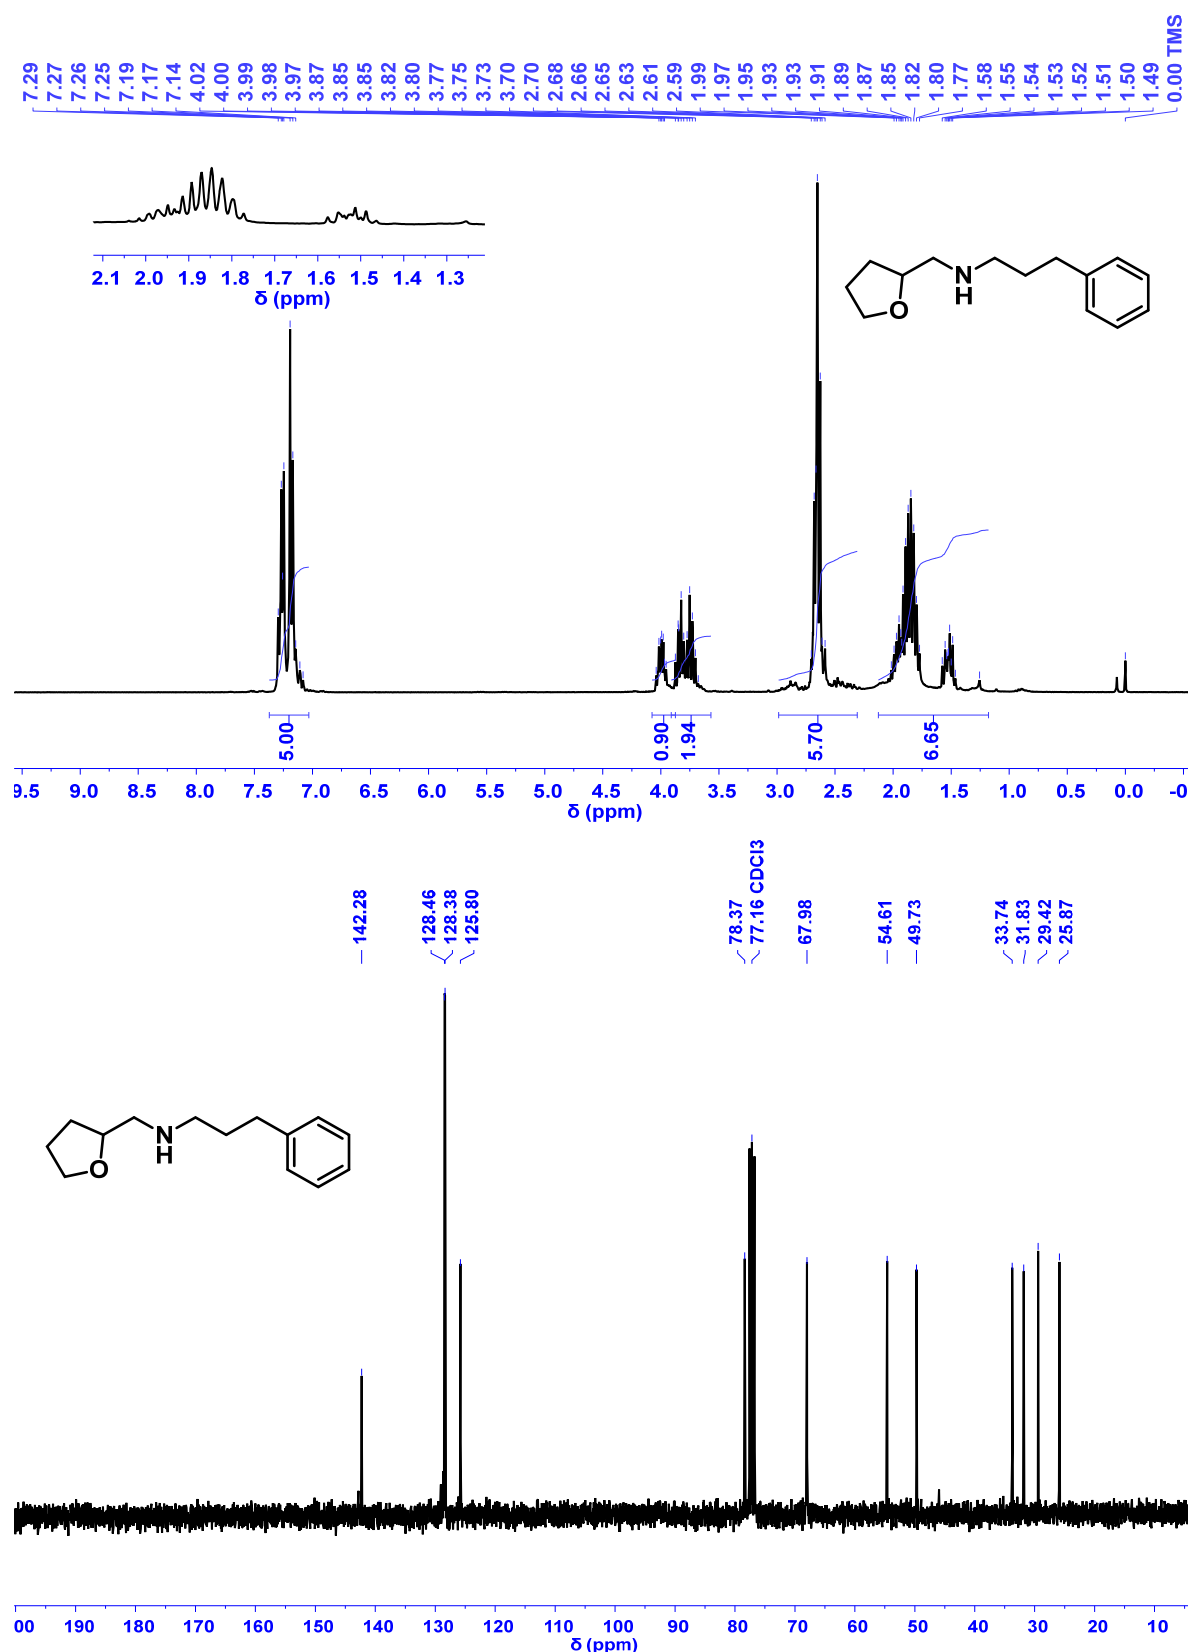

**Fig. S9**  $^1\text{H}$  and  $^{13}\text{C}$   $\{^1\text{H}\}$  NMR of 3-phenyl-*N*-((2-tetrahydrofuranyl)methyl)propan-1-amine **5e**.  $^1\text{H}$  NMR (300 MHz,  $\text{CDCl}_3$ )  $\delta$  7.37 – 7.03 (m, 5H), 3.99 (td,  $J = 7.2, 4.2$  Hz, 1H), 3.91 – 3.57 (m, 2H), 2.99 – 2.31 (m, 6H), 2.13 – 1.18 (m, 7H).  $^{13}\text{C}$   $\{^1\text{H}\}$  NMR (75 MHz,  $\text{CDCl}_3$ )  $\delta$  142.28, 128.46, 128.38, 125.80, 78.37, 67.98, 54.61, 49.73, 33.74, 31.83, 29.42, 25.87.



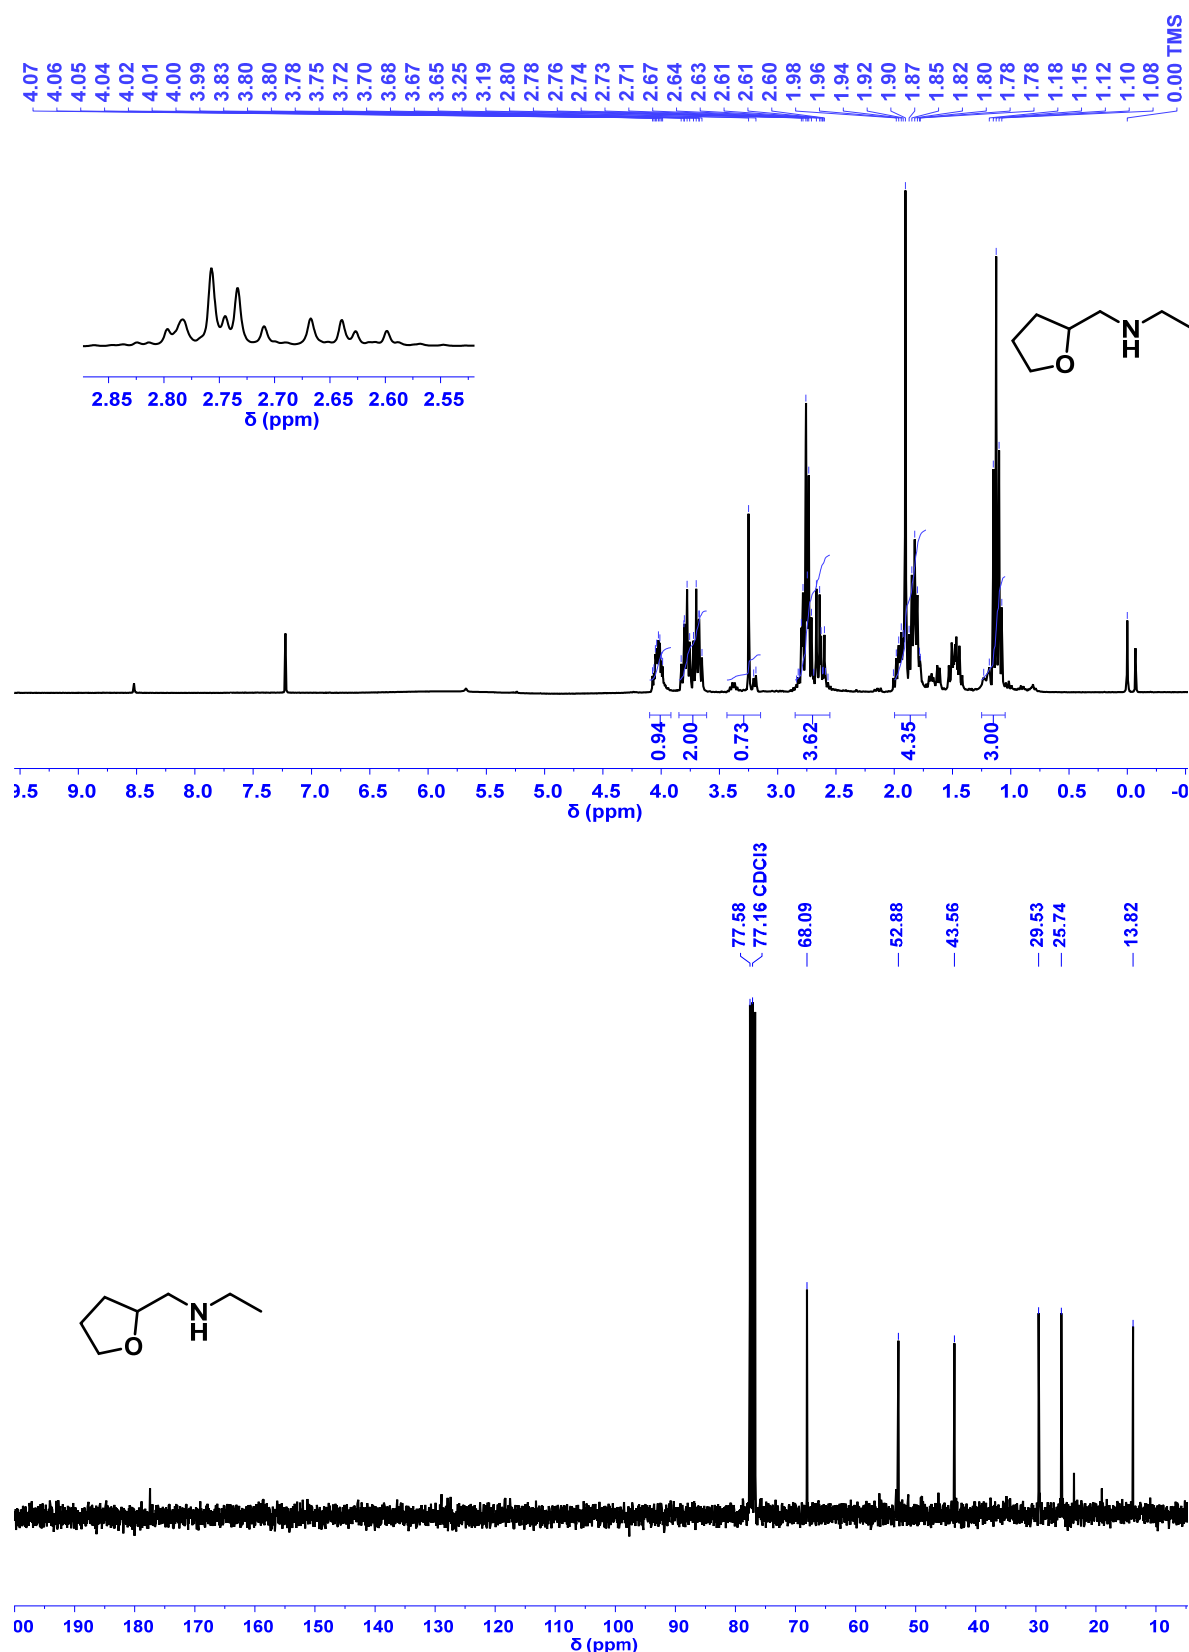

**Fig. S10**  $^1\text{H}$  and  $^{13}\text{C}$   $\{^1\text{H}\}$  NMR of *N*-ethyltetrahydro-2-furanmethanamine **5f**.  $^1\text{H}$  NMR (300 MHz,  $\text{CDCl}_3$ )  $\delta$  4.03 (ddt,  $J = 10.8, 7.3, 3.5$  Hz, 1H), 3.85 – 3.61 (m, 2H), 3.25 (s, 1H), 2.85 – 2.55 (m, 4H), 2.00 – 1.73 (m, 4H), 1.11 (q,  $J = 7.1$  Hz, 3H).  $^{13}\text{C}$   $\{^1\text{H}\}$  NMR (75 MHz,  $\text{CDCl}_3$ )  $\delta$  77.58, 68.09, 52.88, 43.56, 29.53, 25.74, 13.82.

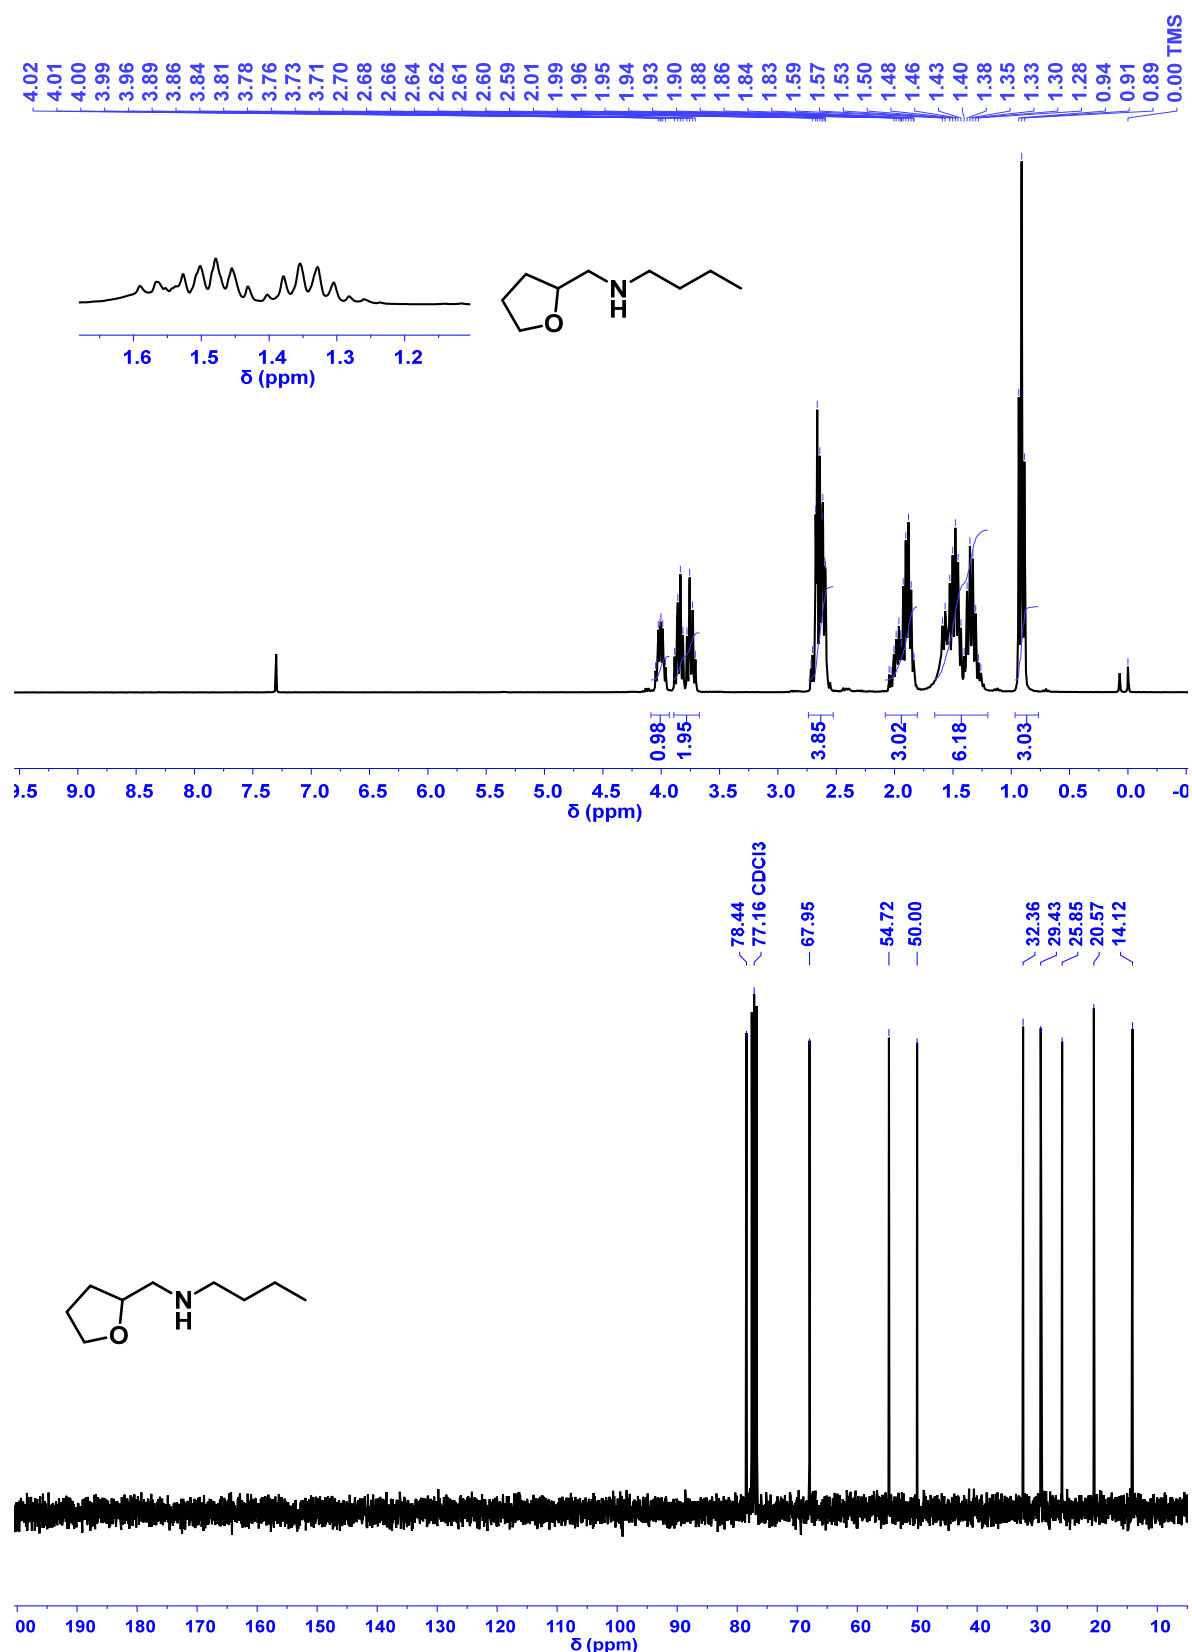

**Fig. S11**  $^1\text{H}$  and  $^{13}\text{C}$   $\{^1\text{H}\}$  NMR of *N*-butyltetrahydro-2-furanmethanamine **5g**.  $^1\text{H}$  NMR (300 MHz,  $\text{CDCl}_3$ )  $\delta$  4.00 (dt,  $J = 11.5, 5.7$  Hz, 1H), 3.80 (dq,  $J = 31.9, 7.6, 7.0$  Hz, 2H), 2.74 – 2.53 (m, 4H), 2.08 – 1.81 (m, 3H), 1.42 (dtt,  $J = 42.7, 13.2, 6.9$  Hz, 6H), 0.91 (t,  $J = 7.2$  Hz, 3H).  $^{13}\text{C}$   $\{^1\text{H}\}$  NMR (75 MHz,  $\text{CDCl}_3$ )  $\delta$  78.44, 67.95, 54.72, 50.00, 32.36, 29.43, 25.85, 20.57, 14.12.

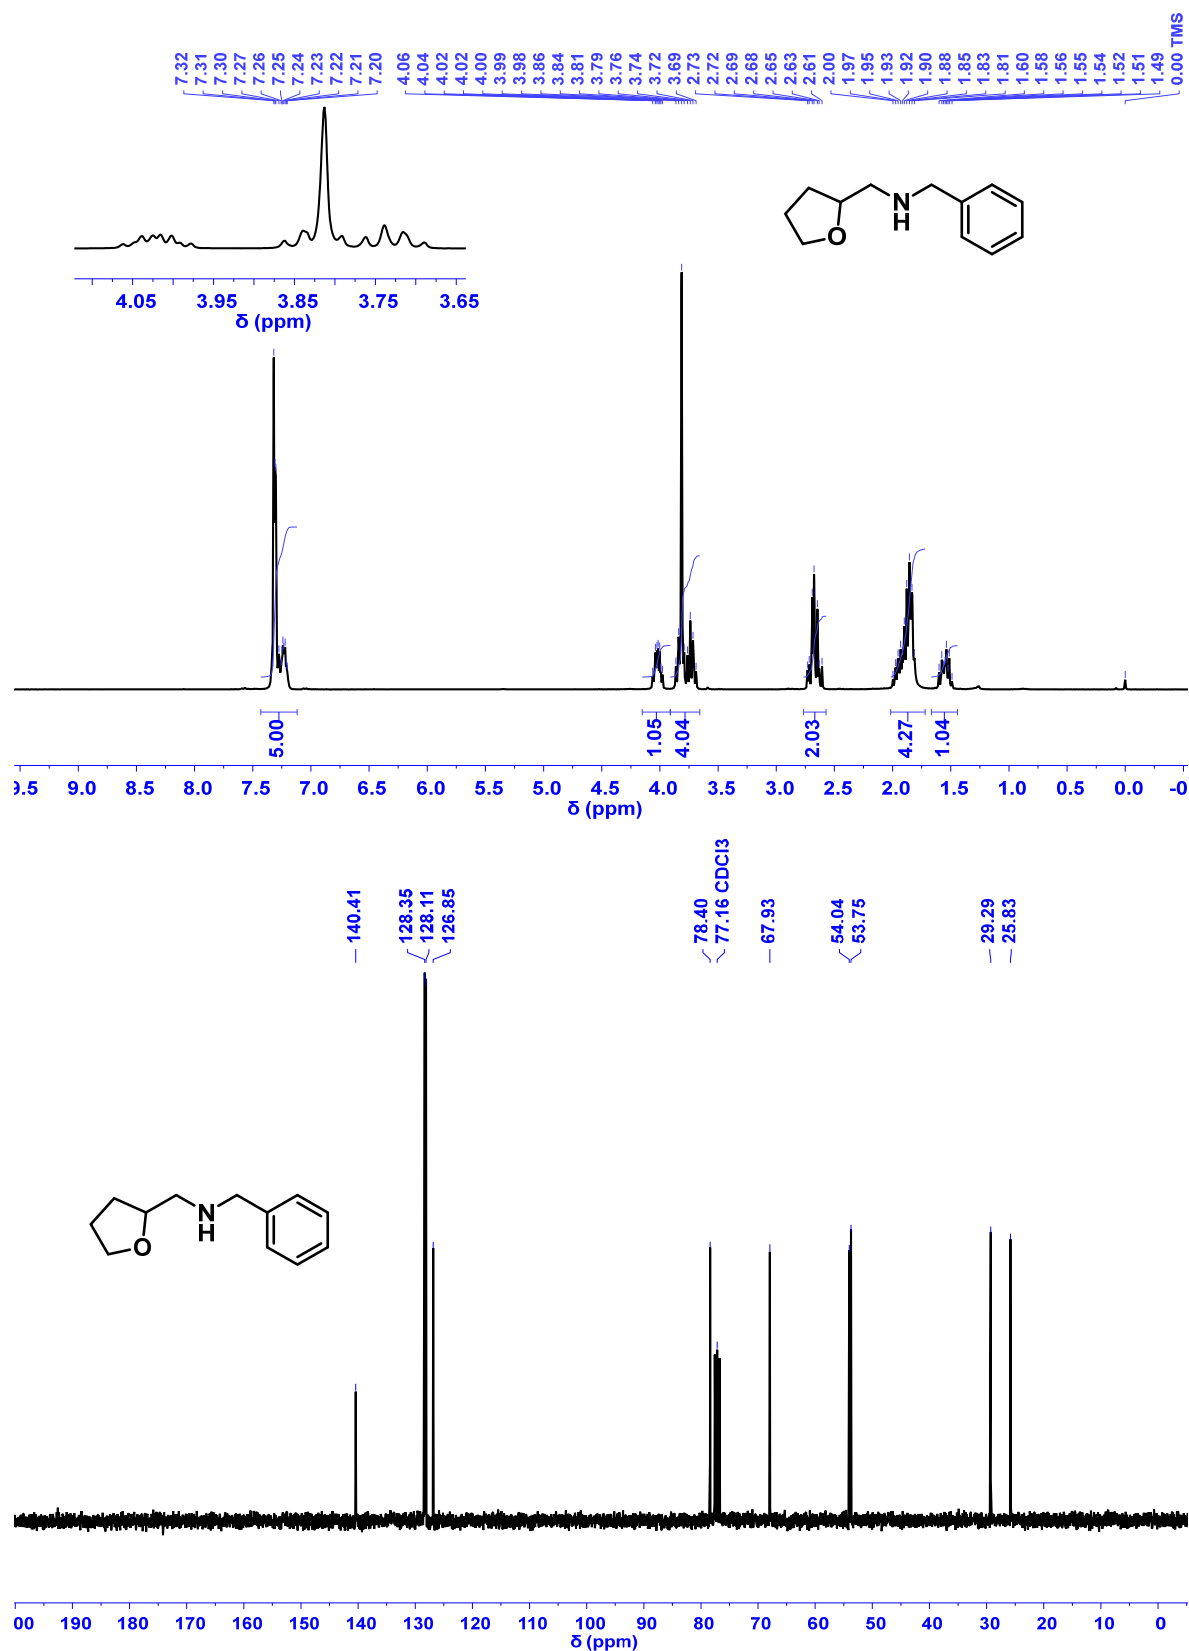

**Fig. S12**  $^1\text{H}$  and  $^{13}\text{C}$   $\{^1\text{H}\}$  NMR of tetrahydro-*N*-(phenylmethyl)-2-furanmethanamine **5h**.  $^1\text{H}$  NMR (300 MHz,  $\text{CDCl}_3$ )  $\delta$  7.43 – 7.12 (m, 5H), 4.01 (td,  $J = 7.1, 4.1$  Hz, 1H), 3.91 – 3.66 (m, 4H), 2.77 – 2.57 (m, 2H), 1.89 (ddt,  $J = 25.9, 12.5, 6.2$  Hz, 4H), 1.54 (dq,  $J = 10.6, 7.2$  Hz, 1H).  $^{13}\text{C}$   $\{^1\text{H}\}$  NMR (75 MHz,  $\text{CDCl}_3$ )  $\delta$  140.41, 128.35, 128.11, 126.85, 78.40, 67.93, 54.04, 53.75, 29.29, 25.83.

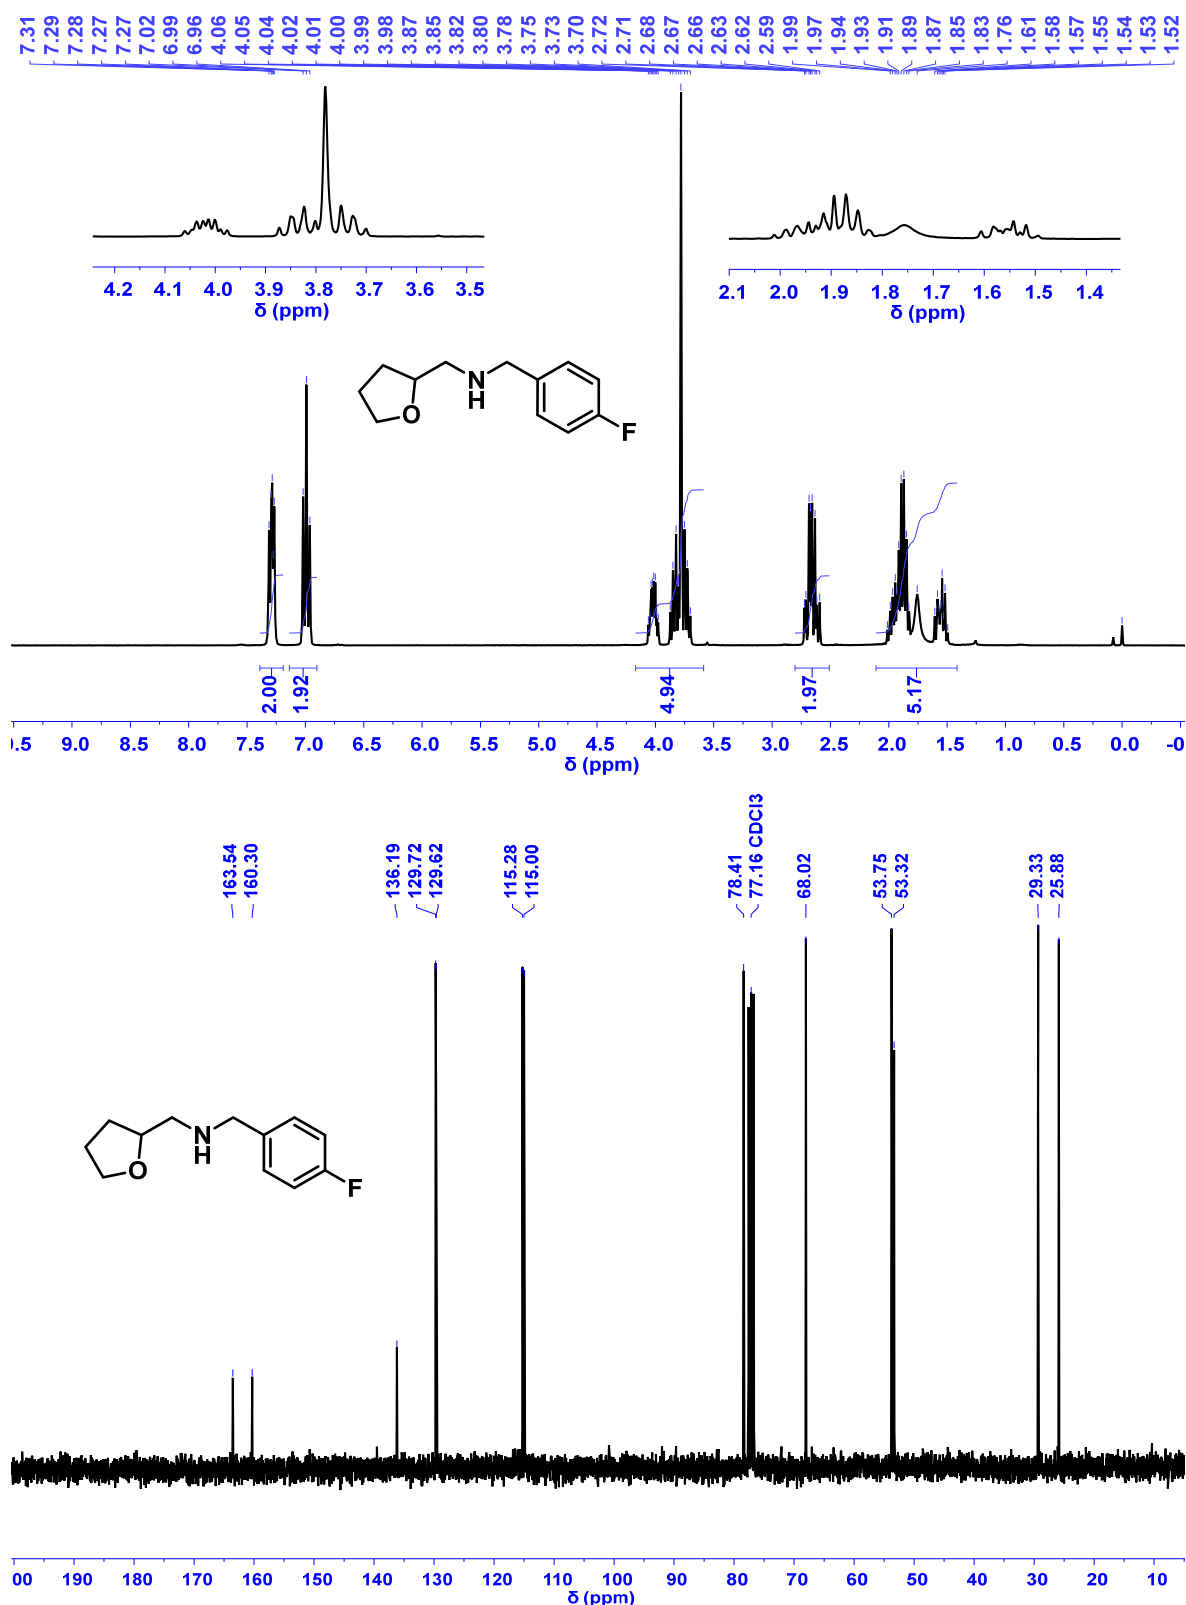

**Fig. S13**  $^1\text{H}$  and  $^{13}\text{C}$   $\{^1\text{H}\}$  NMR of *N*-[(4-fluorophenyl)methyl]tetrahydro-2-furanmethanamine **5i**.  $^1\text{H}$  NMR (300 MHz,  $\text{CDCl}_3$ )  $\delta$  7.39 – 7.19 (m, 2H), 6.99 (t,  $J$  = 8.6 Hz, 2H), 4.17 – 3.59 (m, 5H), 2.66 (qd,  $J$  = 11.9, 5.7 Hz, 2H), 2.11 – 1.41 (m, 5H).  $^{13}\text{C}$   $\{^1\text{H}\}$  NMR (75 MHz,  $\text{CDCl}_3$ )  $\delta$  163.54, 160.30, 136.19, 129.72, 129.62, 115.28, 115.00, 78.41, 68.02, 53.75, 53.32, 29.33, 25.88.

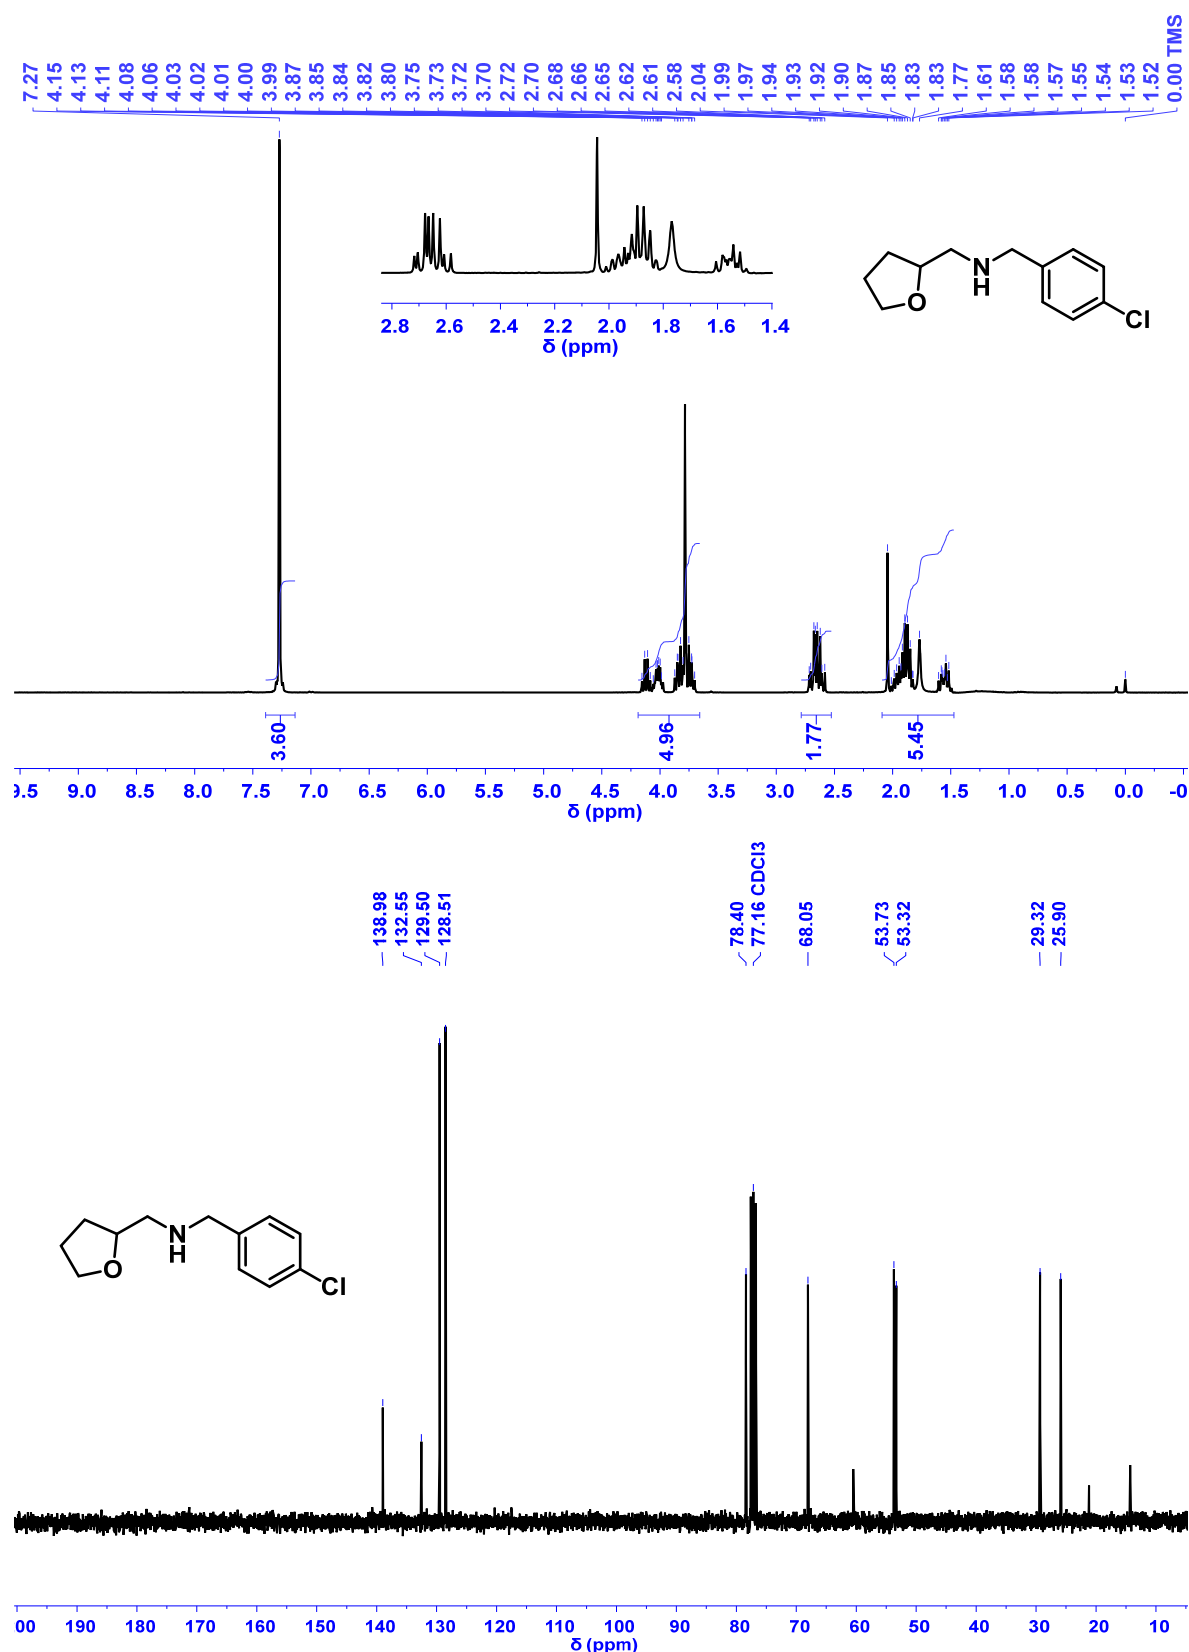

**Fig. S14**  $^1\text{H}$  and  $^{13}\text{C}$   $\{^1\text{H}\}$  NMR of *N*-[(4-chlorophenyl)methyl]tetrahydro-2-furanmethanamine **5j**.  $^1\text{H}$  NMR (300 MHz,  $\text{CDCl}_3$ )  $\delta$  7.27 (s, 4H), 4.19 – 3.66 (m, 5H), 2.65 (qd,  $J = 11.9, 5.7$  Hz, 2H), 2.09 – 1.47 (m, 5H).  $^{13}\text{C}$   $\{^1\text{H}\}$  NMR (75 MHz,  $\text{CDCl}_3$ )  $\delta$  138.98, 132.55, 129.50, 128.51, 78.40, 68.05, 53.73, 53.32, 29.32, 25.90.

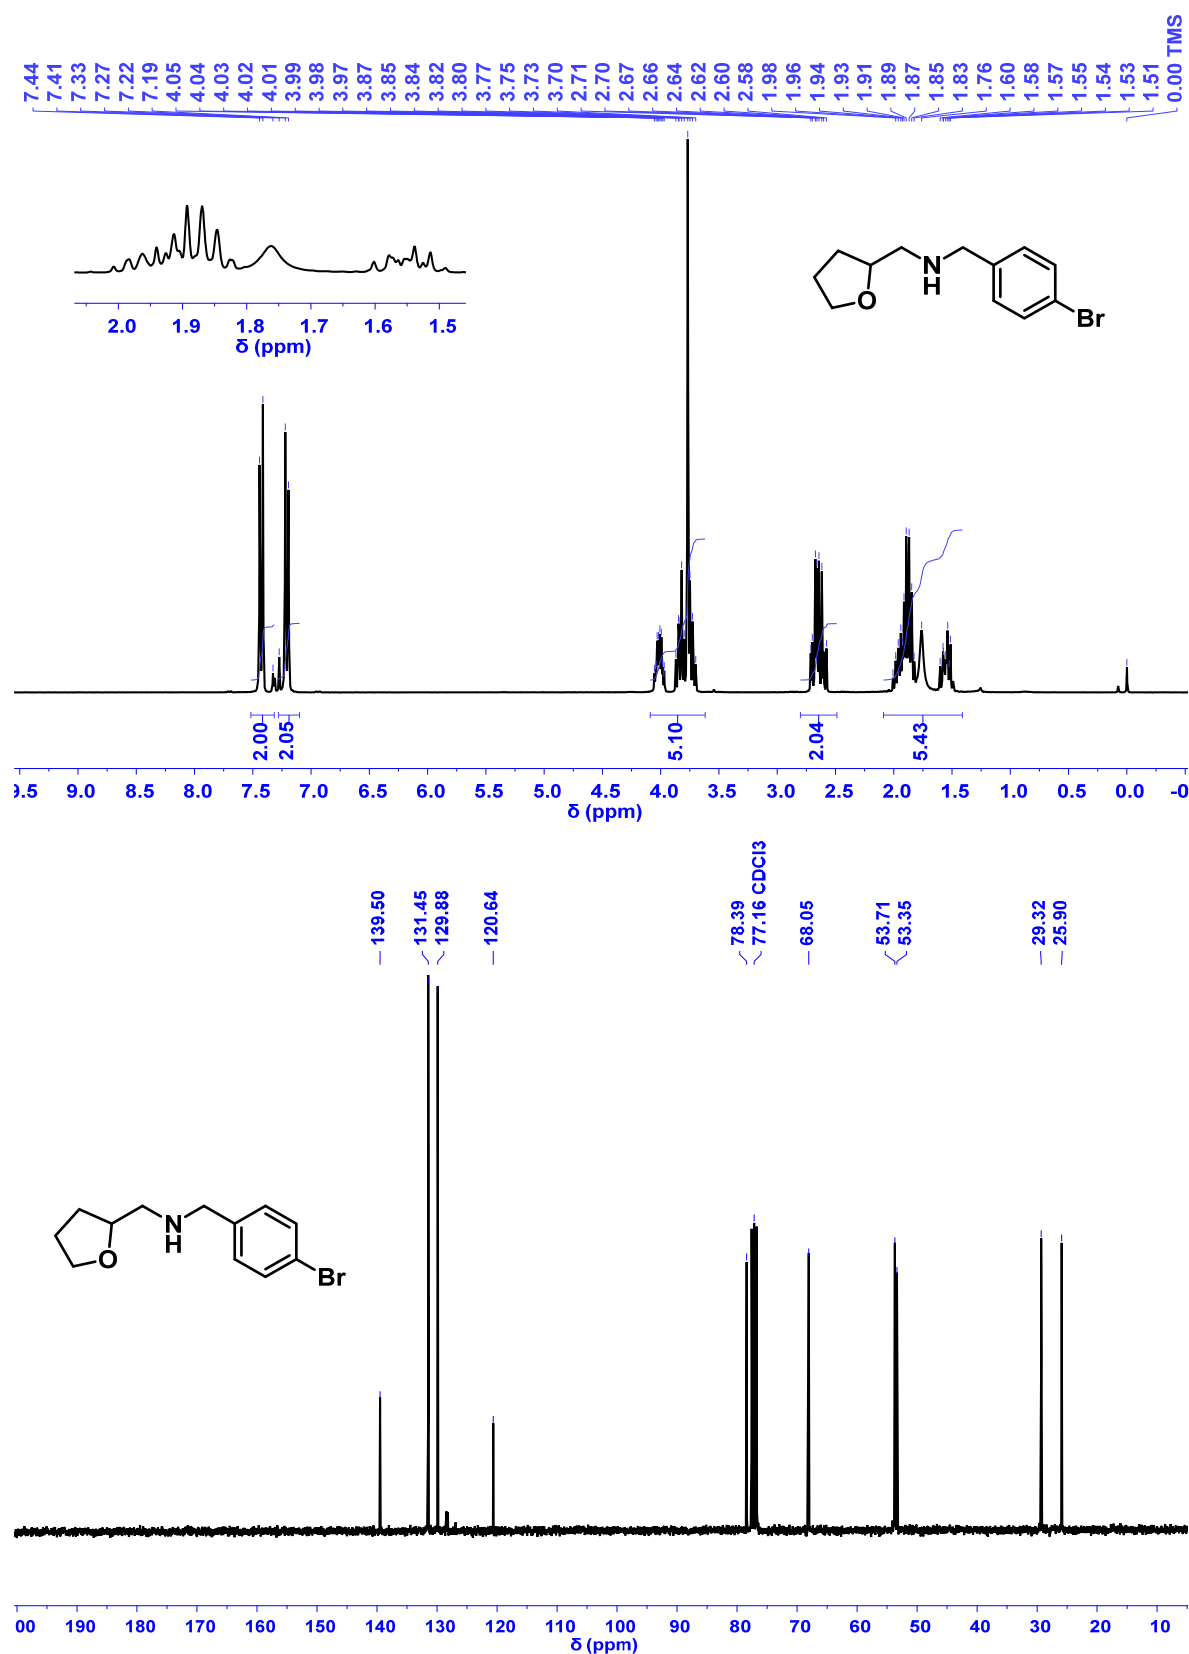

**Fig. S15**  $^1\text{H}$  and  $^{13}\text{C}$   $\{^1\text{H}\}$  NMR of *N*-[(4-bromophenyl)methyl]tetrahydro-2-furanmethanamine **5k**.  $^1\text{H}$  NMR (300 MHz,  $\text{CDCl}_3$ )  $\delta$  = 7.43 (d,  $J$  = 8.3 Hz, 2H), 7.21 (d,  $J$  = 8.3 Hz, 2H), 4.09 – 3.62 (m, 5H), 2.65 (qd,  $J$  = 11.9, 5.7 Hz, 2H), 2.09 – 1.41 (m, 5H).  $^{13}\text{C}$   $\{^1\text{H}\}$  NMR (75 MHz,  $\text{CDCl}_3$ )  $\delta$  = 139.50, 131.45, 129.88, 120.64, 78.39, 68.05, 53.71, 53.35, 29.32, 25.90.

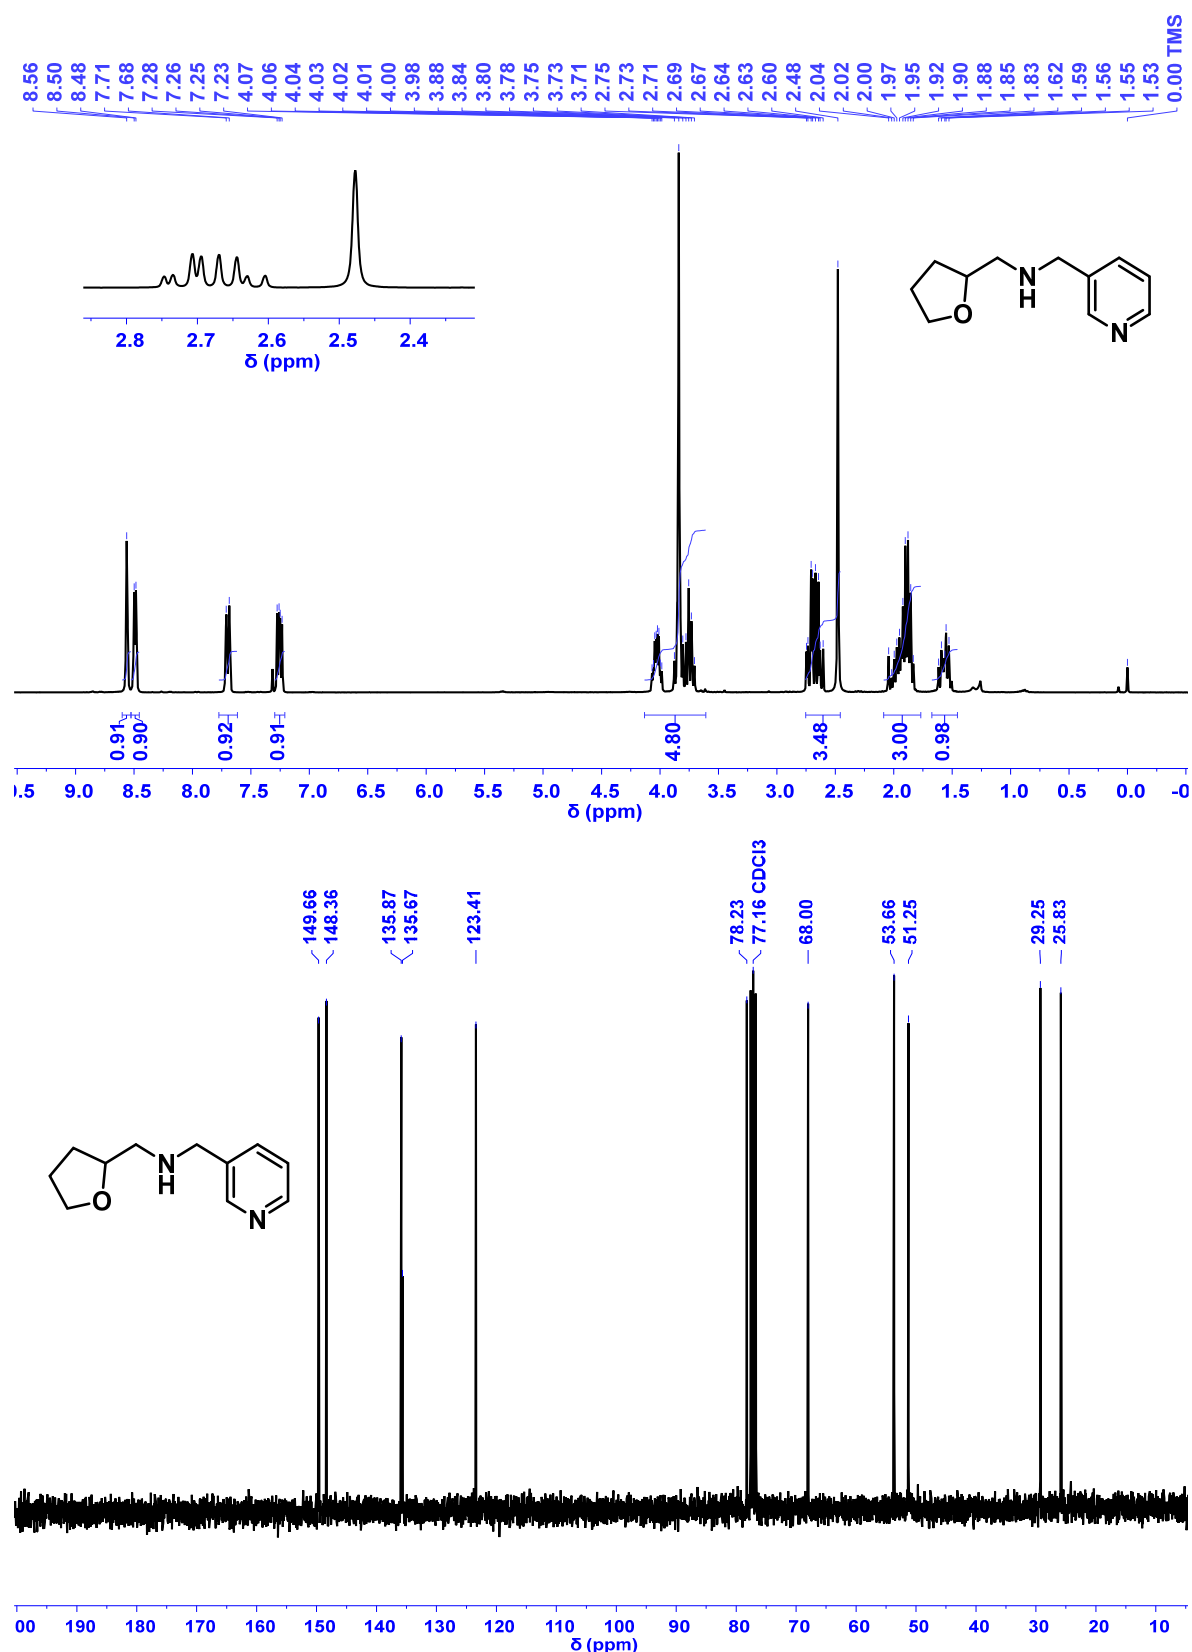

**Fig. S16**  $^1\text{H}$  and  $^{13}\text{C}$   $\{^1\text{H}\}$  NMR of *N*-[(tetrahydro-2-furanyl)methyl]-3-pyridinemethanamine **51**.  $^1\text{H}$  NMR (300 MHz,  $\text{CDCl}_3$ )  $\delta$  8.56 (s, 1H), 8.49 (d,  $J = 4.7$  Hz, 1H), 7.70 (d,  $J = 7.8$  Hz, 1H), 7.25 (dd,  $J = 7.7, 4.8$  Hz, 1H), 4.13 – 3.61 (m, 5H), 2.75 – 2.46 (m, 3H), 1.94 (dh,  $J = 26.6, 7.2, 6.5$  Hz, 3H), 1.67 – 1.45 (m, 1H).  $^{13}\text{C}$   $\{^1\text{H}\}$  NMR (75 MHz,  $\text{CDCl}_3$ )  $\delta$  149.66, 148.36, 135.87, 135.67, 123.41, 78.23, 68.00, 53.66, 51.25, 29.25, 25.83.

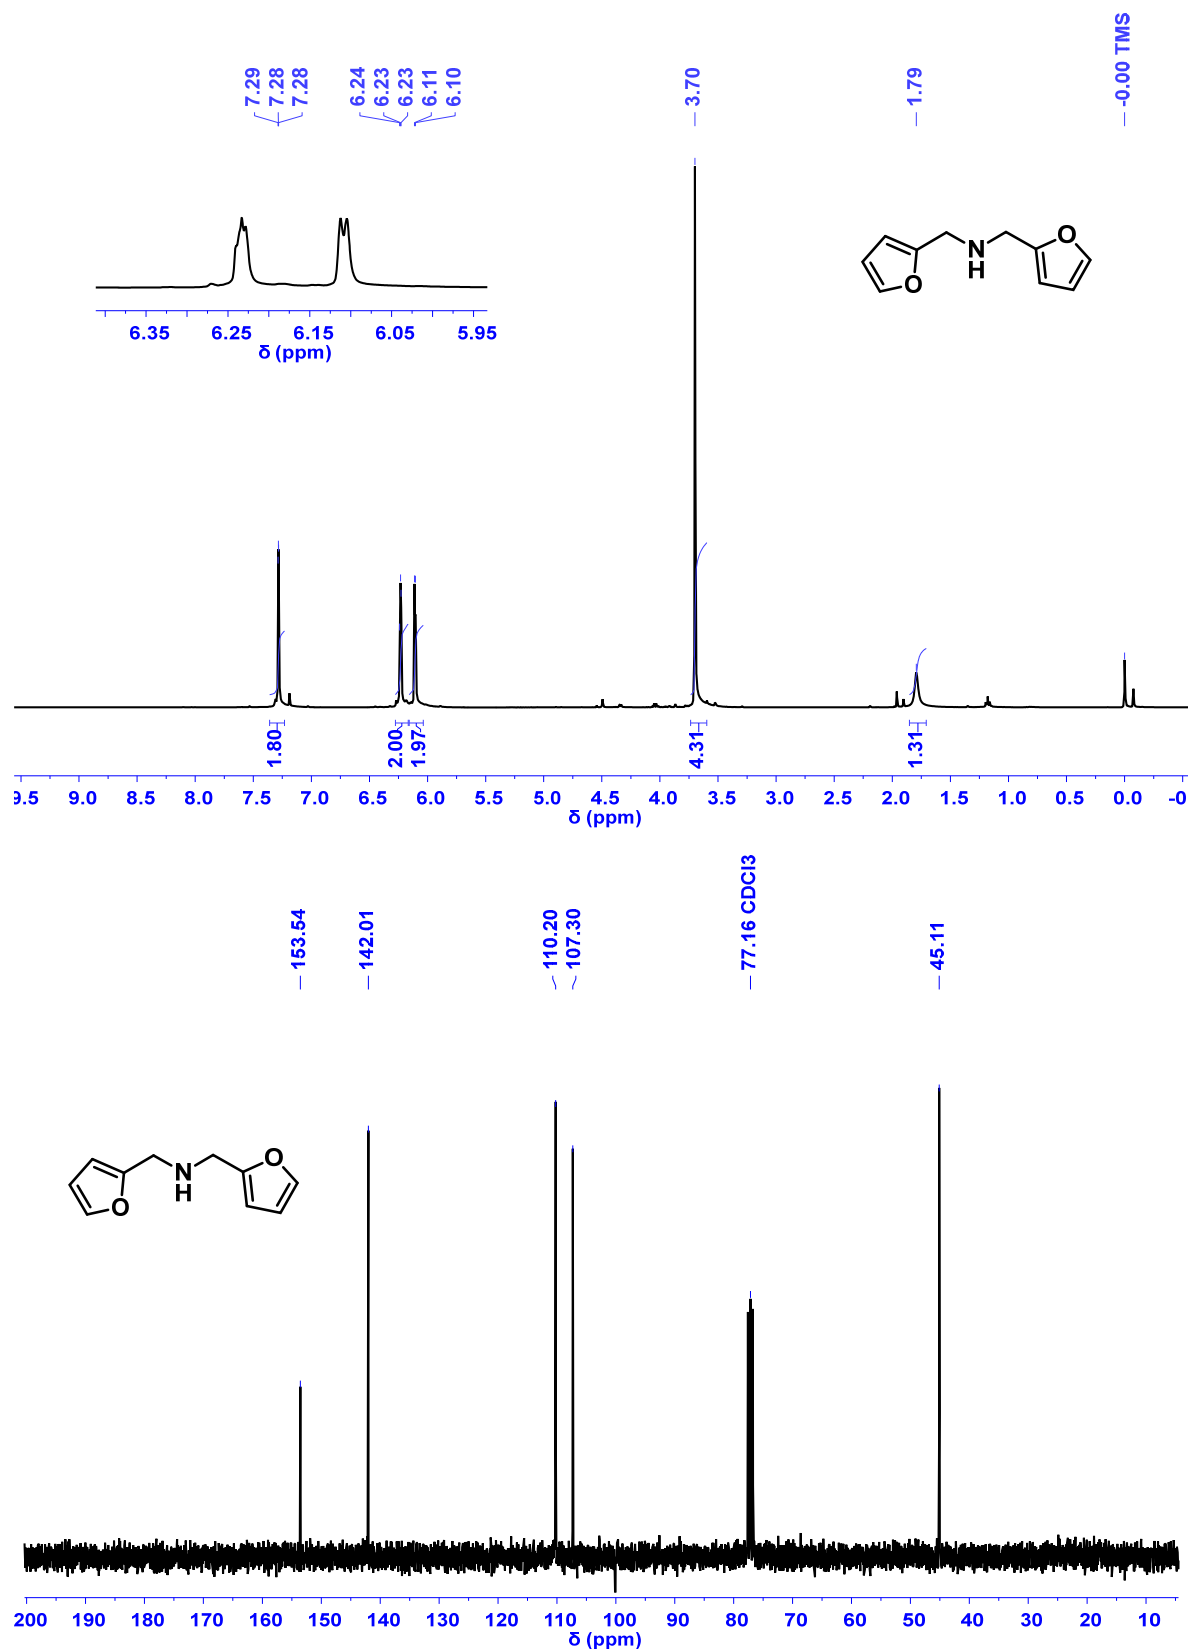

**Fig. S17**  $^1\text{H}$  and  $^{13}\text{C}$   $\{^1\text{H}\}$  NMR of *N*-(2-furanylmethyl)-2-furanmethanamine **5m**.  $^1\text{H}$  NMR (300 MHz,  $\text{CDCl}_3$ )  $\delta$  7.36 – 7.23 (m, 2H), 6.28 – 6.17 (m, 2H), 6.11 (d,  $J$  = 3.0 Hz, 2H), 3.70 (s, 4H), 1.79 (s, 1H).  $^{13}\text{C}$   $\{^1\text{H}\}$  NMR (75 MHz,  $\text{CDCl}_3$ )  $\delta$  153.54, 142.01, 110.20, 107.30, 45.11.



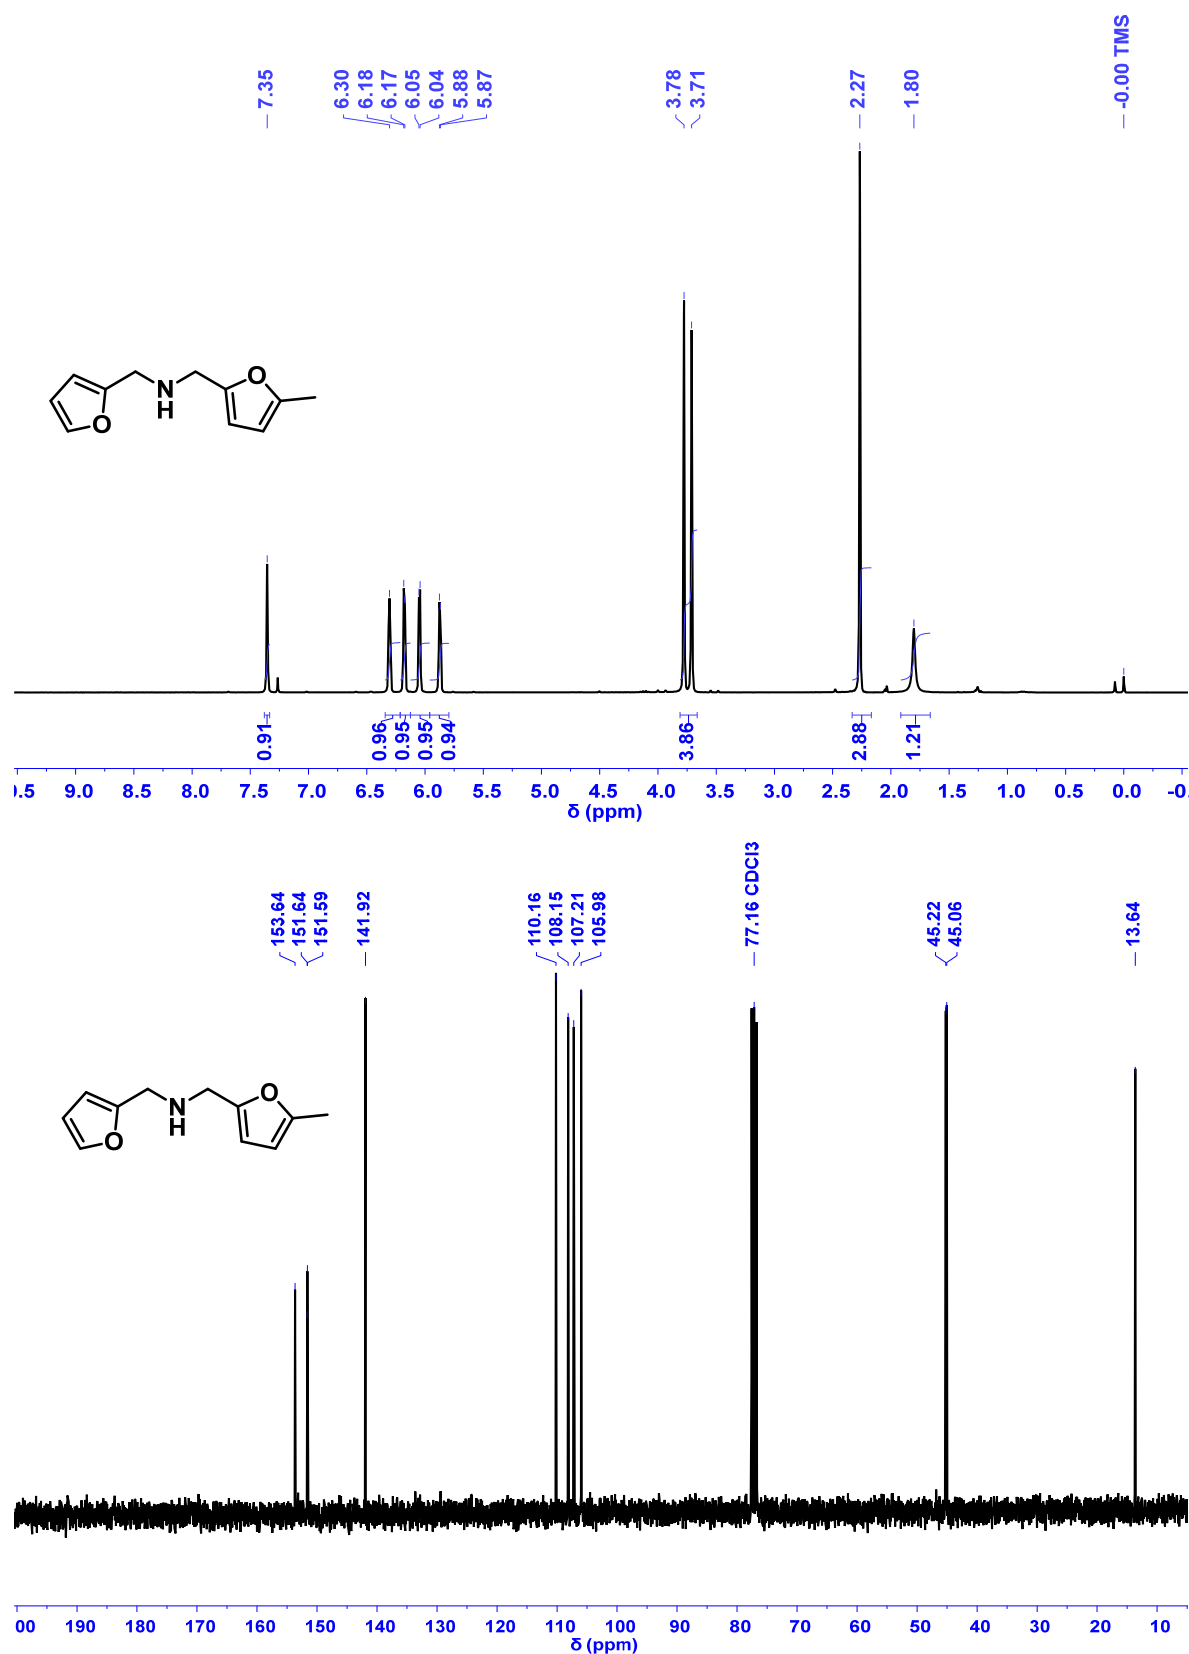

**Fig. S18** <sup>1</sup>H and <sup>13</sup>C {<sup>1</sup>H} NMR of *N*-(2-furanylmethyl)-5-methyl-2-furanmethanamine **5n**. <sup>1</sup>H NMR (300 MHz, CDCl<sub>3</sub>) δ 7.35 (s, 1H), 6.30 (s, 1H), 6.18 (d, *J* = 3.0 Hz, 1H), 6.05 (d, *J* = 2.9 Hz, 1H), 5.87 (d, *J* = 2.6 Hz, 1H), 3.74 (d, *J* = 19.6 Hz, 4H), 2.27 (s, 3H), 1.80 (s, 1H). <sup>13</sup>C {<sup>1</sup>H} NMR (75 MHz, CDCl<sub>3</sub>) δ 153.64, 151.64, 151.59, 141.92, 110.16, 108.15, 107.21, 105.98, 45.22, 45.06, 13.64.

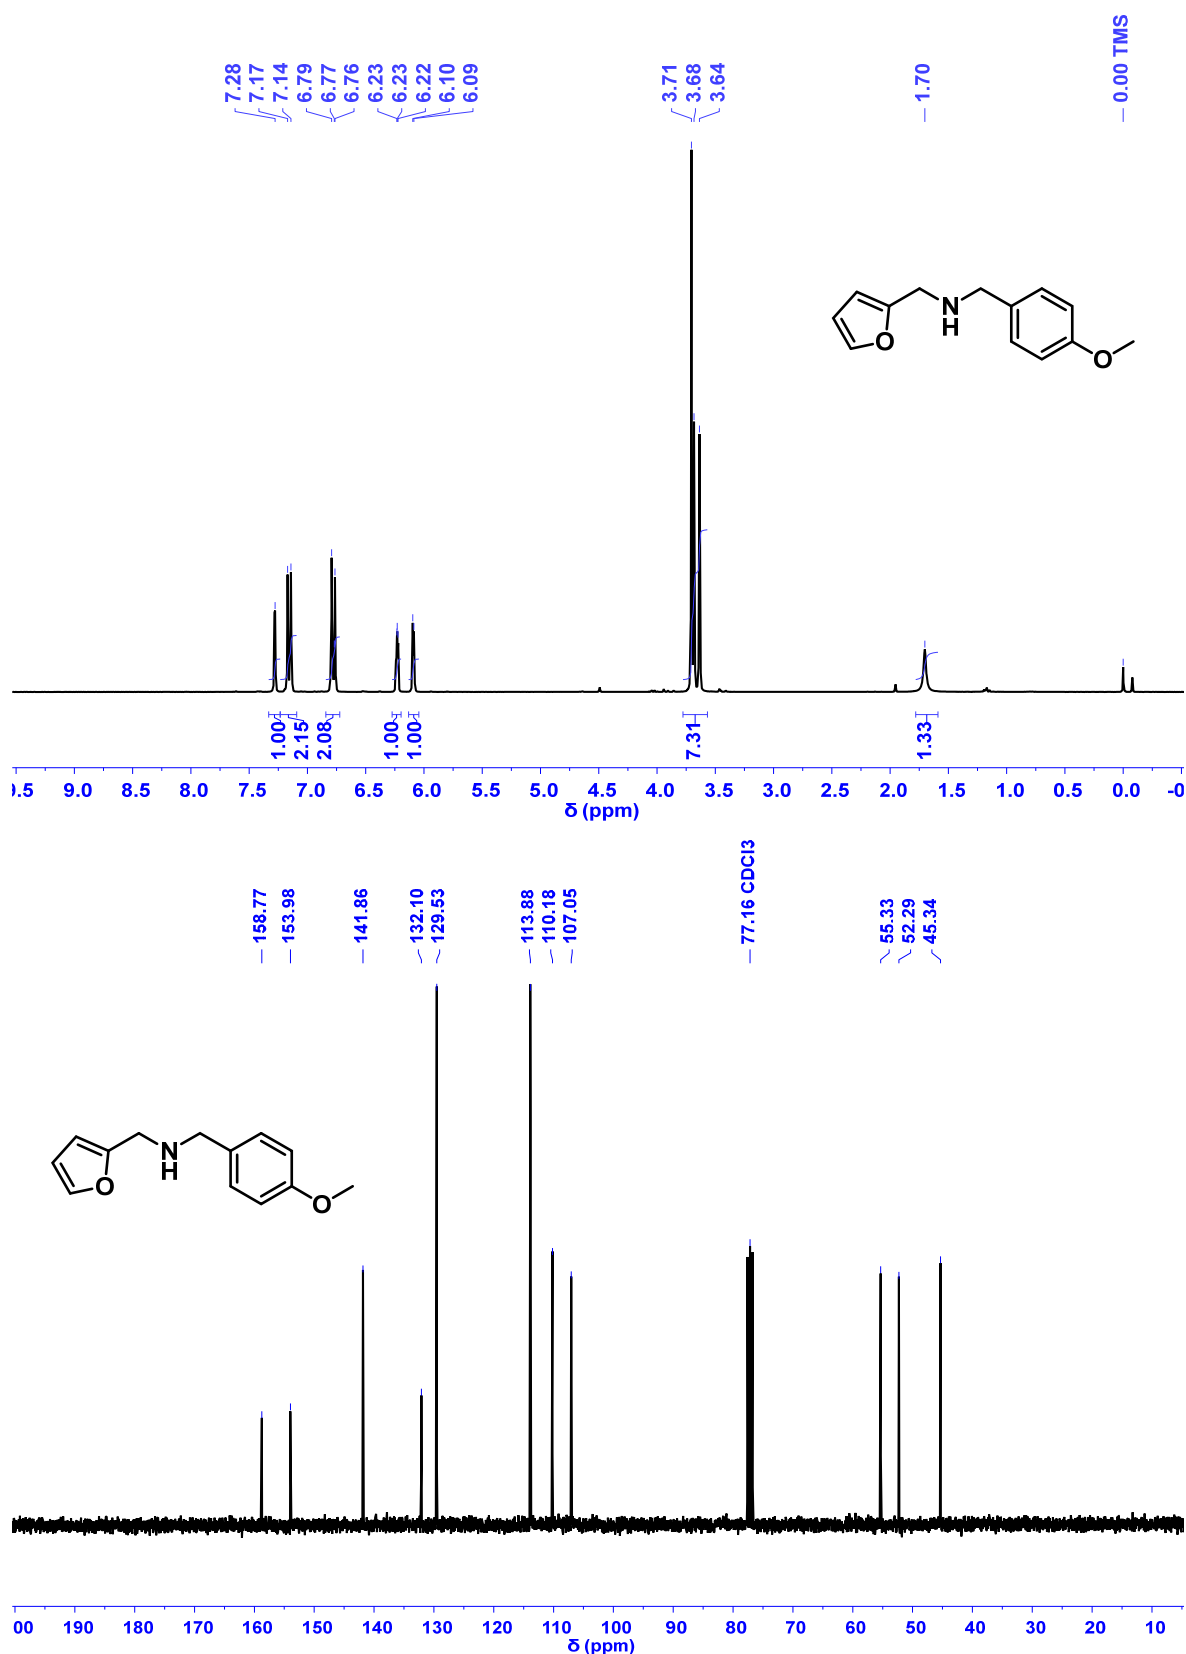

**Fig. S19** <sup>1</sup>H and <sup>13</sup>C {<sup>1</sup>H} NMR of *N*-[(4-methoxyphenyl)methyl]-2-furanmethanamine **50**. <sup>1</sup>H NMR (300 MHz, CDCl<sub>3</sub>) δ 7.28 (s, 1H), 7.16 (d, *J* = 8.5 Hz, 2H), 6.84 – 6.72 (m, 2H), 6.27 – 6.20 (m, 1H), 6.09 (d, *J* = 3.1 Hz, 1H), 3.78 – 3.57 (m, 7H), 1.70 (s, 1H). <sup>13</sup>C {<sup>1</sup>H} NMR (75 MHz, CDCl<sub>3</sub>) δ 158.77, 153.98, 141.86, 132.10, 129.53, 113.88, 110.18, 107.05, 55.33, 52.29, 45.34.

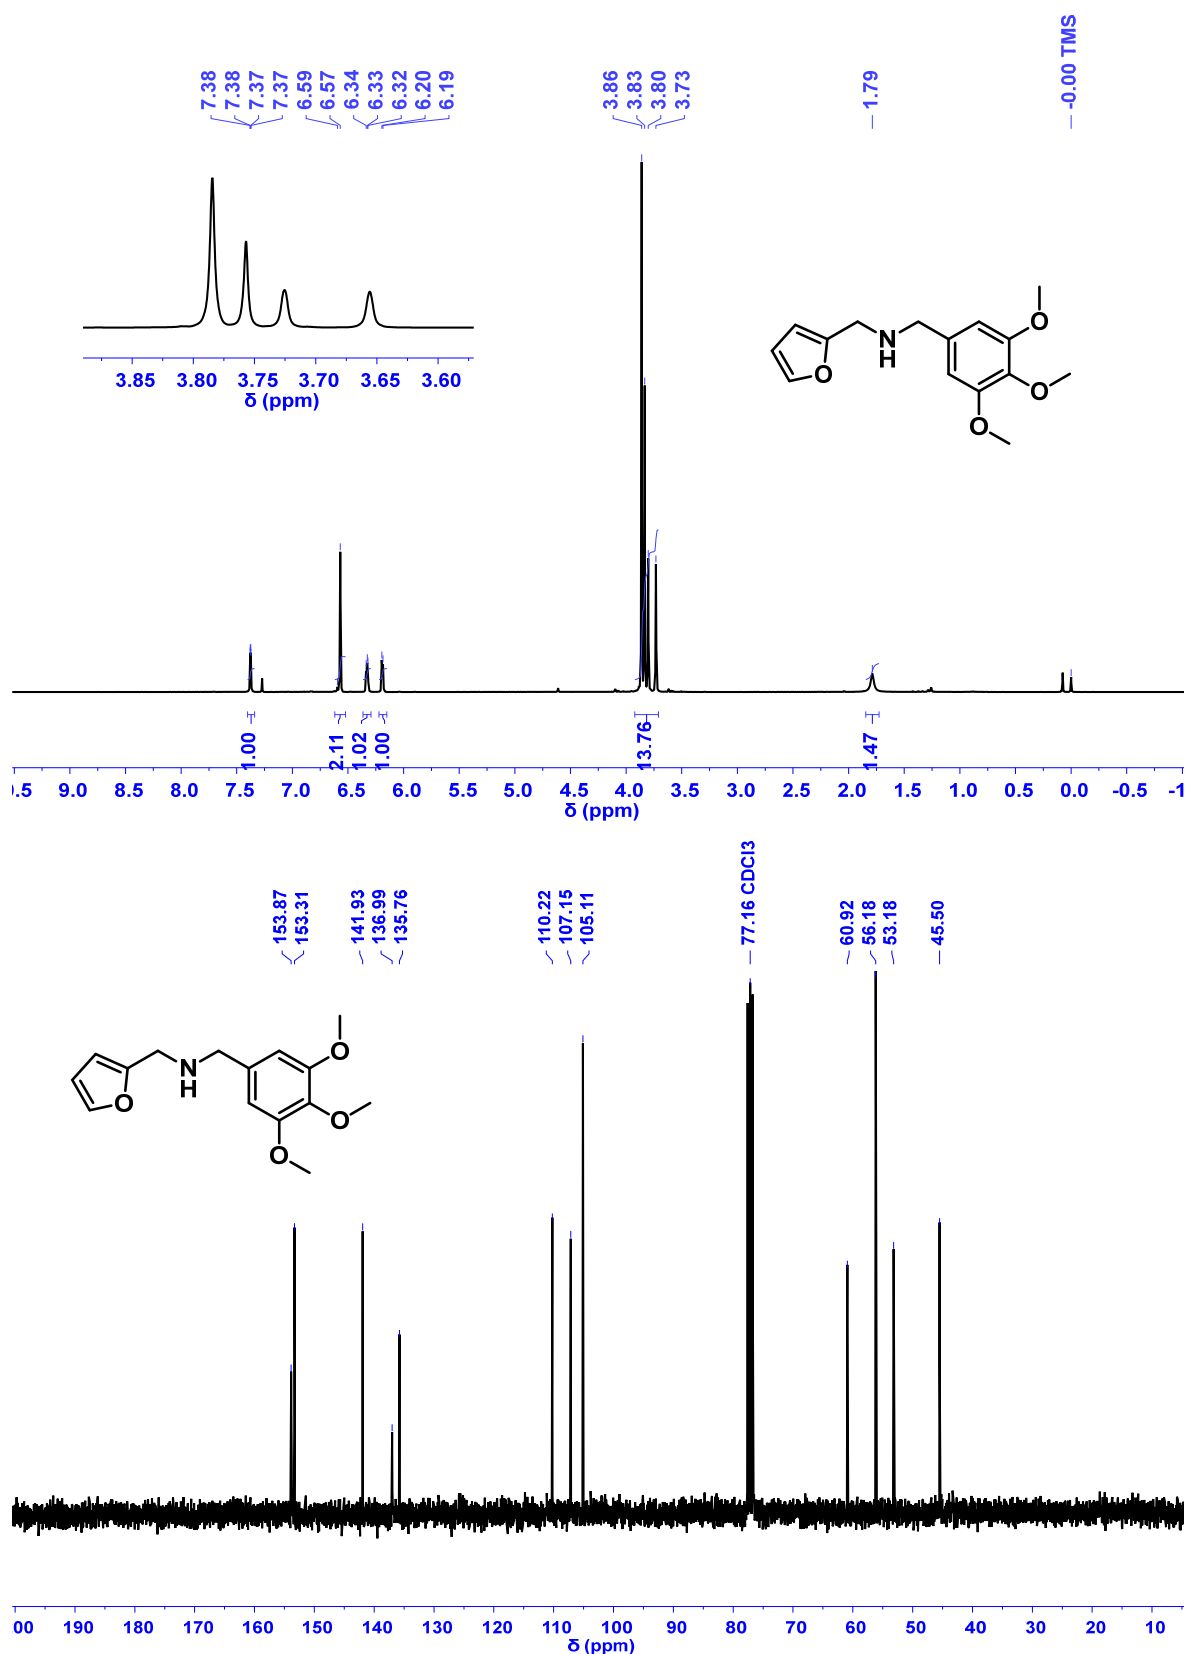

**Fig. S20**  $^1\text{H}$  and  $^{13}\text{C}$   $\{^1\text{H}\}$  NMR of *N*-[(3,4,5-trimethoxyphenyl)methyl]-2-furanmethanamine **5p**.  $^1\text{H}$  NMR (300 MHz,  $\text{CDCl}_3$ )  $\delta$  7.38 (dd,  $J = 1.8, 0.7$  Hz, 1H), 6.57 (s, 2H), 6.37 – 6.29 (m, 1H), 6.19 (d,  $J = 3.1$  Hz, 1H), 3.92 – 3.71 (m, 14H), 1.79 (s, 1H).  $^{13}\text{C}$   $\{^1\text{H}\}$  NMR (75 MHz,  $\text{CDCl}_3$ )  $\delta$  153.87, 153.31, 141.93, 136.99, 135.76, 110.22, 107.15, 105.11, 60.92, 56.18, 53.18, 45.50.

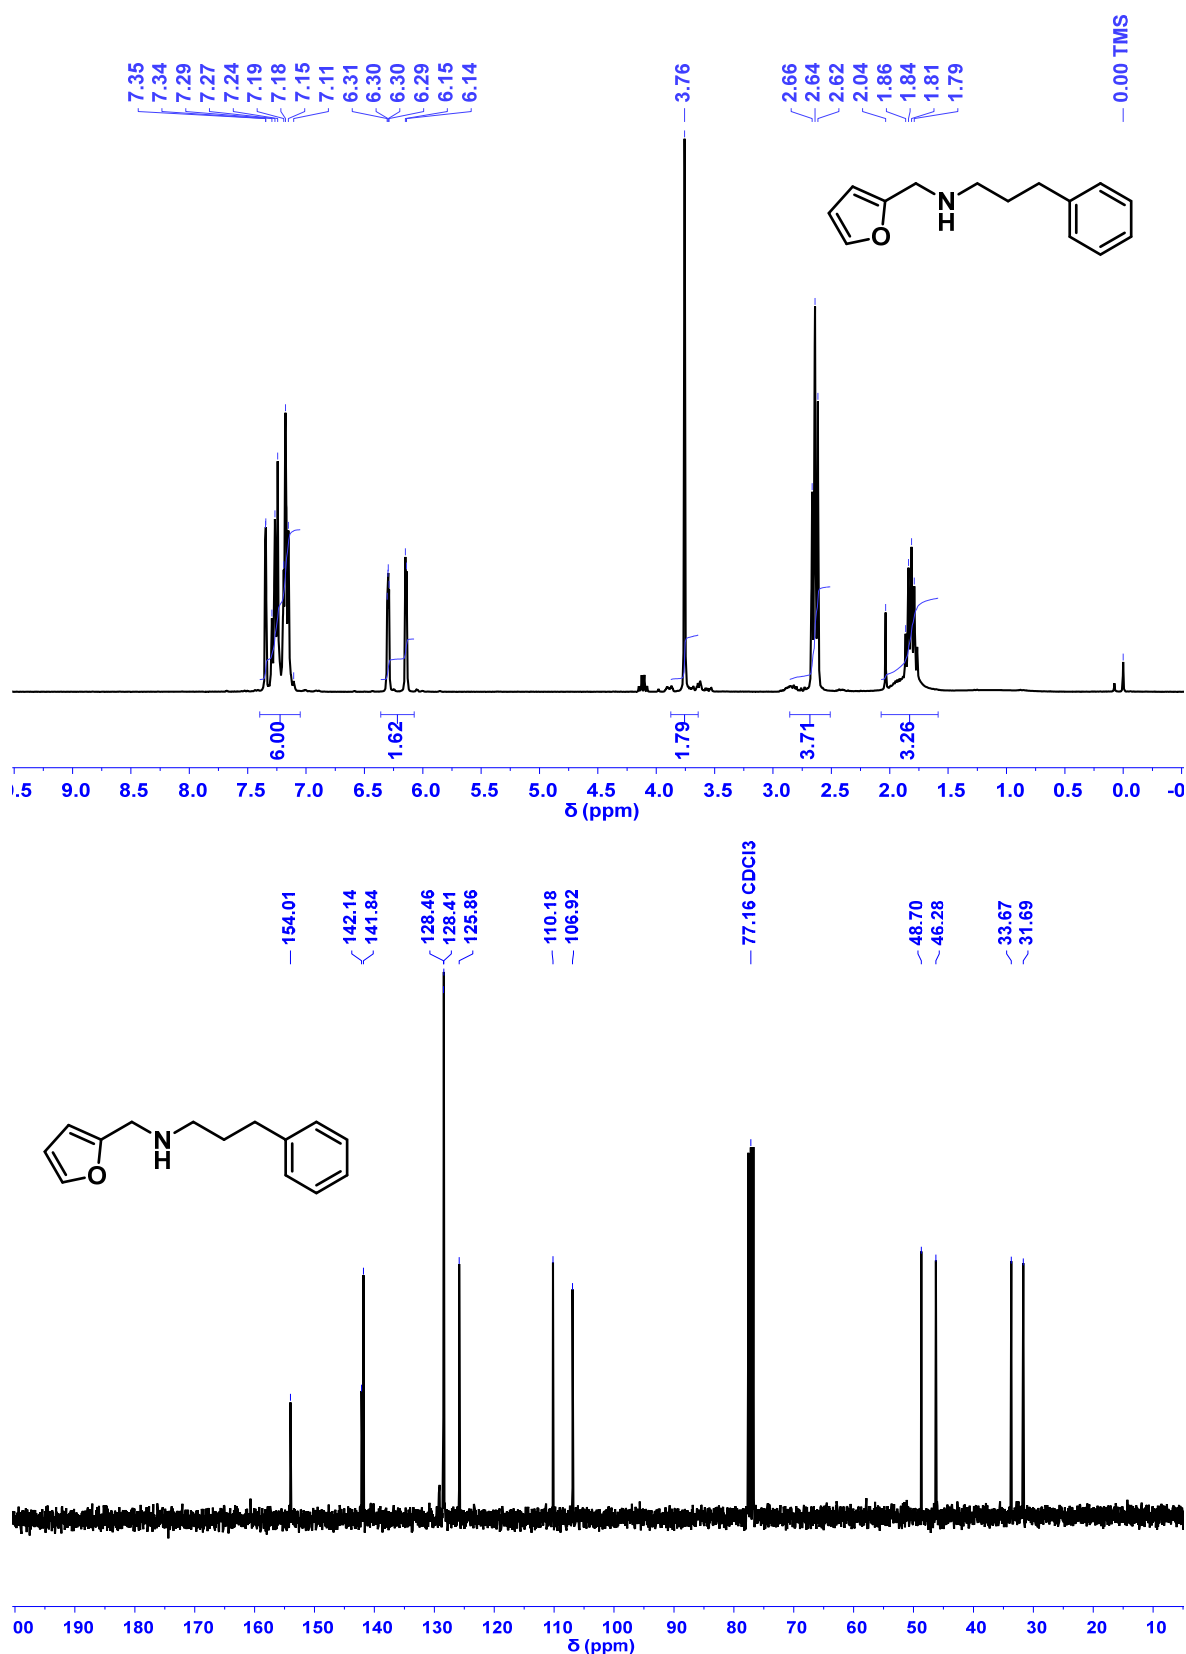

**Fig. S21**  $^1\text{H}$  and  $^{13}\text{C}$   $\{^1\text{H}\}$  NMR of *N*-(3-phenylpropyl)-2-furanmethanamine **5q**.  $^1\text{H}$  NMR (300 MHz,  $\text{CDCl}_3$ )  $\delta$  7.40 – 7.05 (m, 6H), 6.36 – 6.07 (m, 2H), 3.76 (s, 2H), 2.64 (t,  $J = 7.3$  Hz, 4H), 2.07 – 1.59 (m, 3H).  $^{13}\text{C}$   $\{^1\text{H}\}$  NMR (75 MHz,  $\text{CDCl}_3$ )  $\delta$  154.01, 142.14, 141.84, 128.46, 128.41, 125.86, 110.18, 106.92, 48.70, 46.28, 33.67, 31.69.

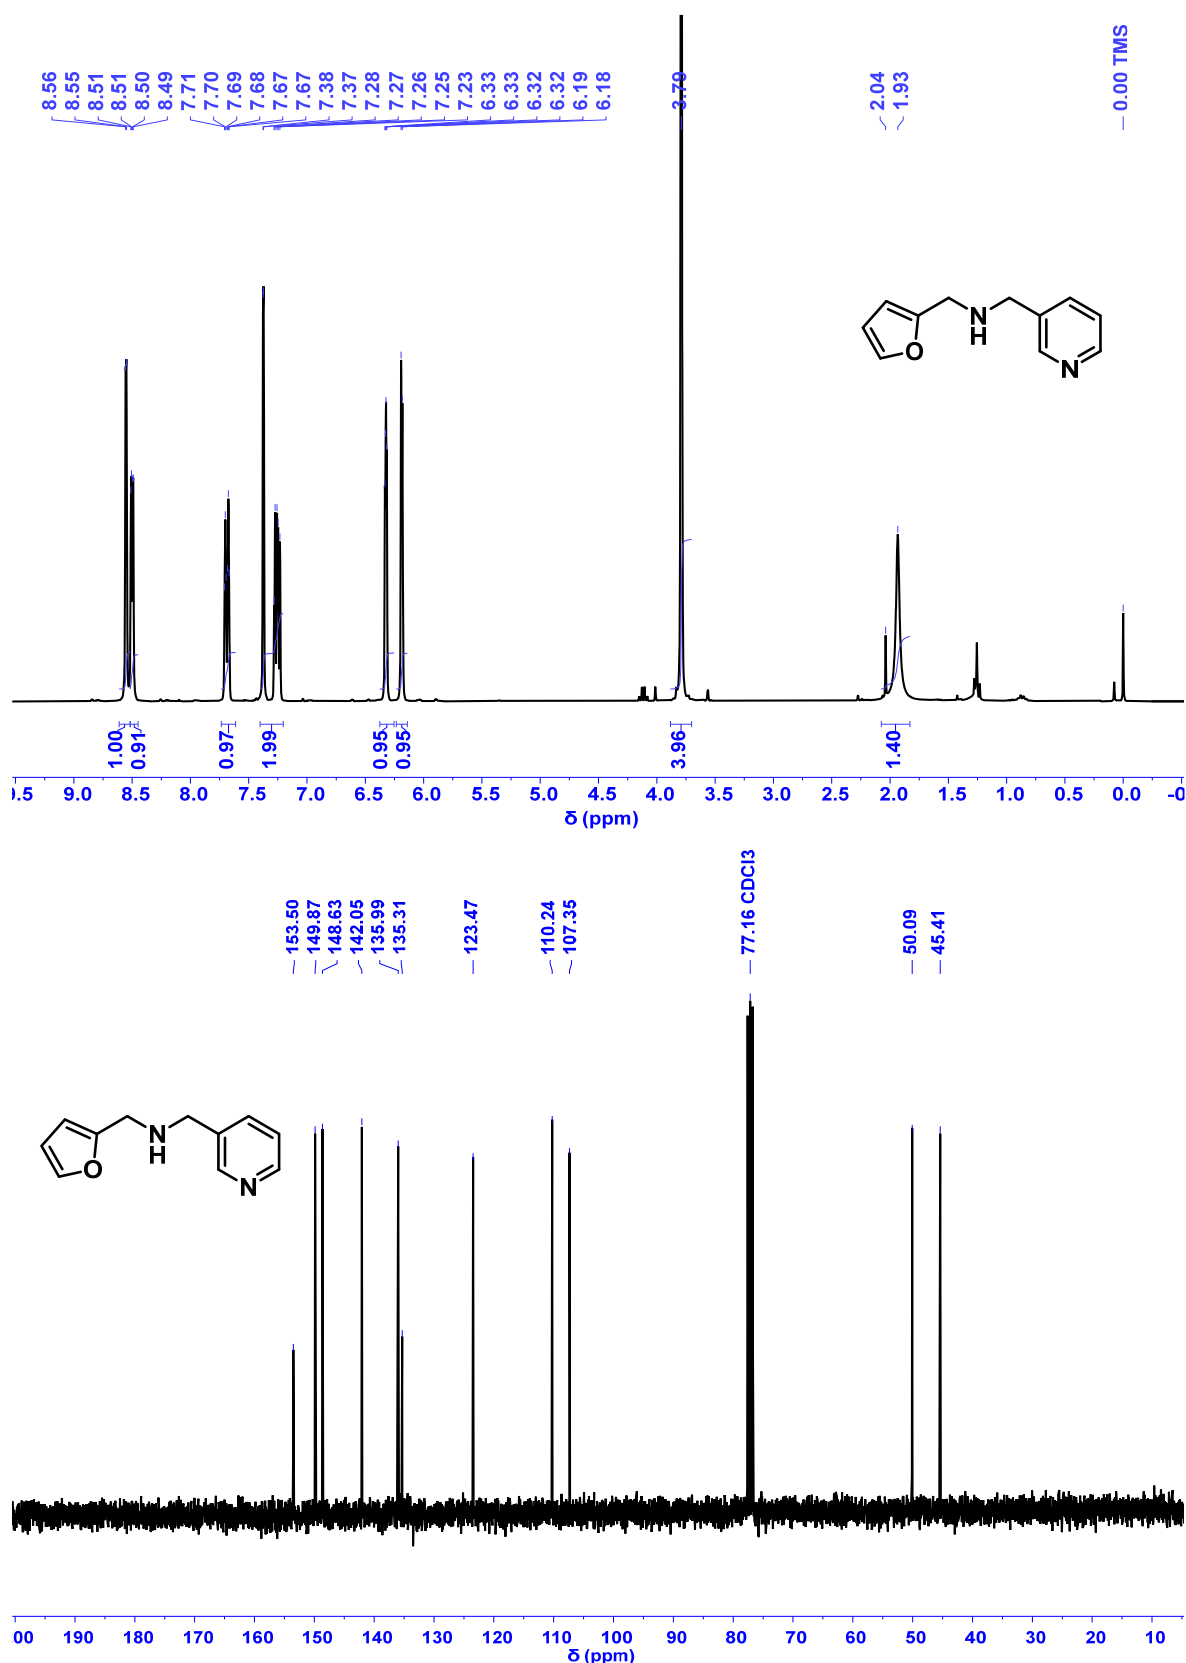

**Fig. S22** <sup>1</sup>H and <sup>13</sup>C {<sup>1</sup>H} NMR of *N*-(2-furanylmethyl)-3-pyridinemethanamine **5r**. <sup>1</sup>H NMR (300 MHz, CDCl<sub>3</sub>) δ 8.55 (d, *J* = 2.2 Hz, 1H), 8.50 (dd, *J* = 4.8, 1.6 Hz, 1H), 7.69 (dt, *J* = 7.9, 2.0 Hz, 1H), 7.40 – 7.20 (m, 2H), 6.32 (dd, *J* = 3.2, 1.9 Hz, 1H), 6.19 (d, *J* = 3.2 Hz, 1H), 3.79 (s, 4H), 1.99 (d, *J* = 31.3 Hz, 1H). <sup>13</sup>C {<sup>1</sup>H} NMR (75 MHz, CDCl<sub>3</sub>) δ 153.50, 149.87, 148.63, 142.05, 135.99, 135.31, 123.47, 110.24, 107.35, 50.09, 45.41.

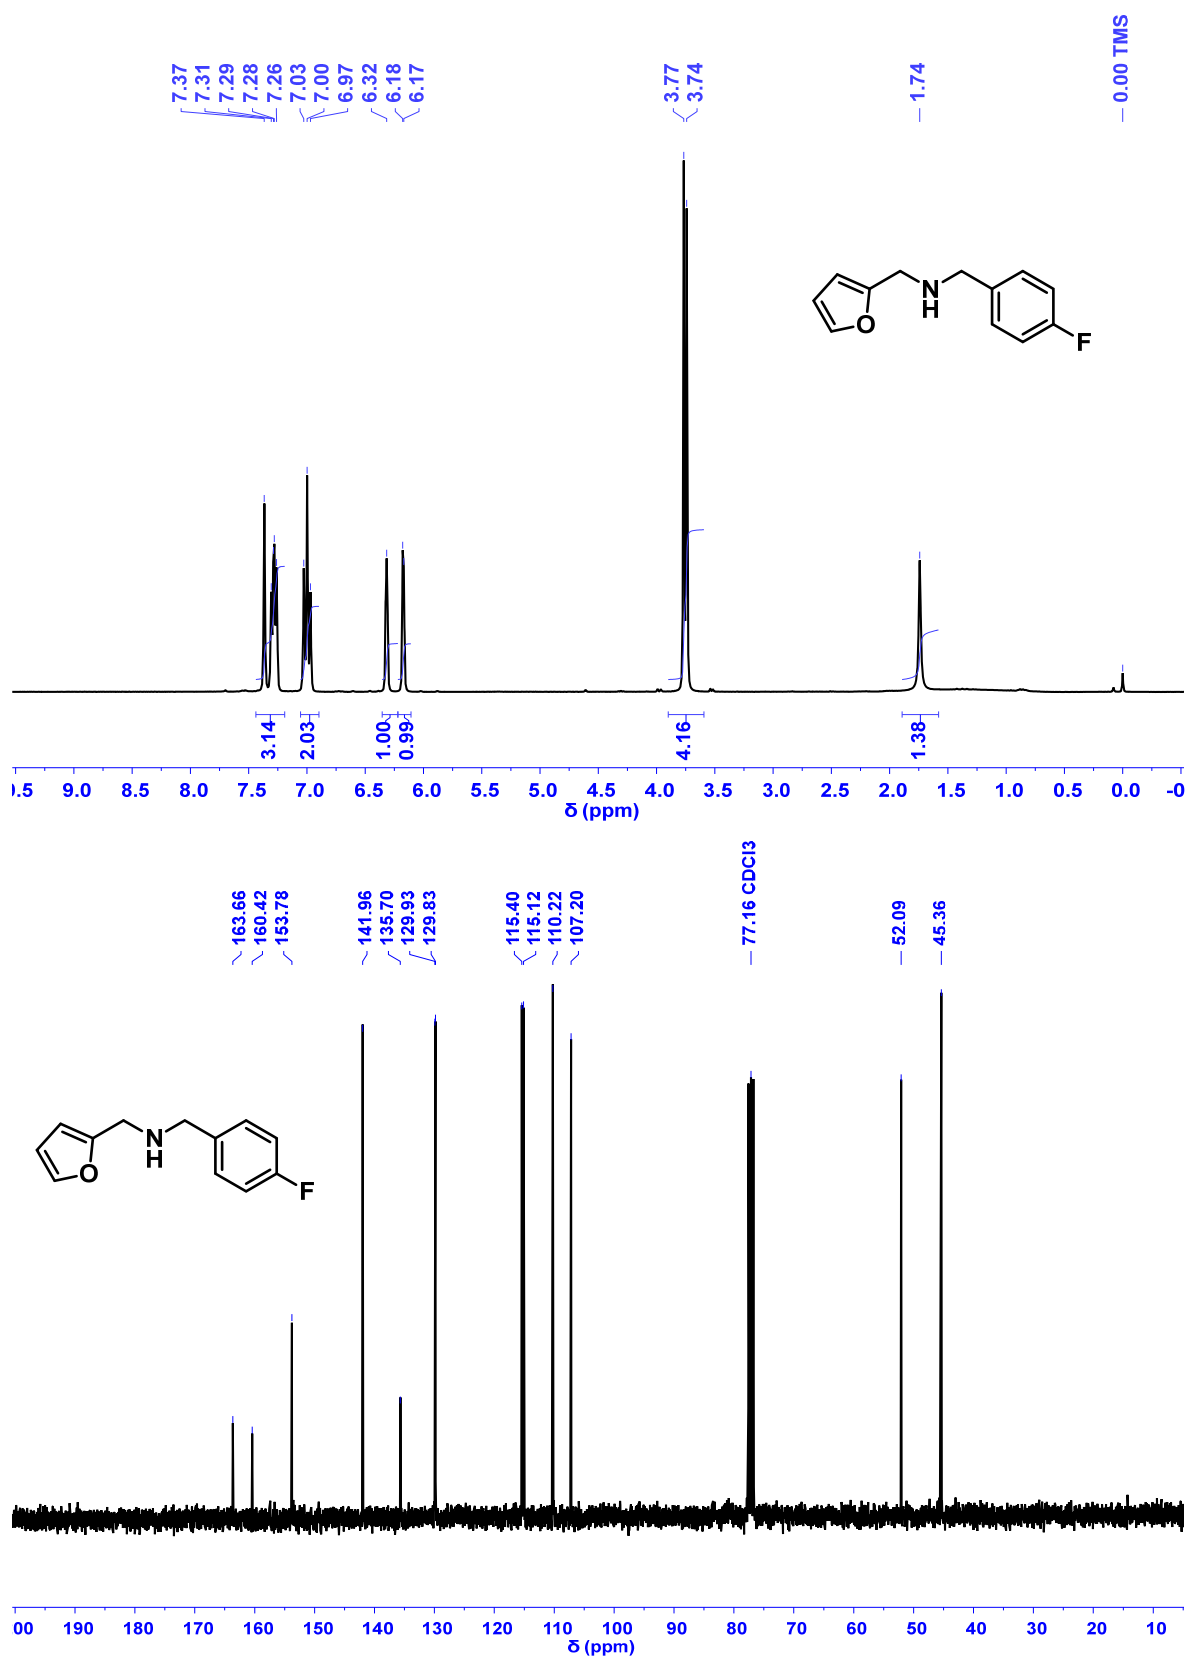

**Fig. S23**  $^1\text{H}$  and  $^{13}\text{C}$   $\{^1\text{H}\}$  NMR of *N*-[(4-fluorophenyl)methyl]-2-furanmethanamine **5s**.  $^1\text{H}$  NMR (300 MHz,  $\text{CDCl}_3$ )  $\delta$  7.44 – 7.19 (m, 3H), 7.00 (t,  $J$  = 8.6 Hz, 2H), 6.32 (s, 1H), 6.17 (d,  $J$  = 2.9 Hz, 1H), 3.75 (d,  $J$  = 7.6 Hz, 4H), 1.74 (s, 1H).  $^{13}\text{C}$   $\{^1\text{H}\}$  NMR (75 MHz,  $\text{CDCl}_3$ )  $\delta$  163.66, 160.42, 153.78, 141.96, 135.70, 129.93, 129.83, 115.40, 115.12, 110.22, 107.20, 52.09, 45.36.

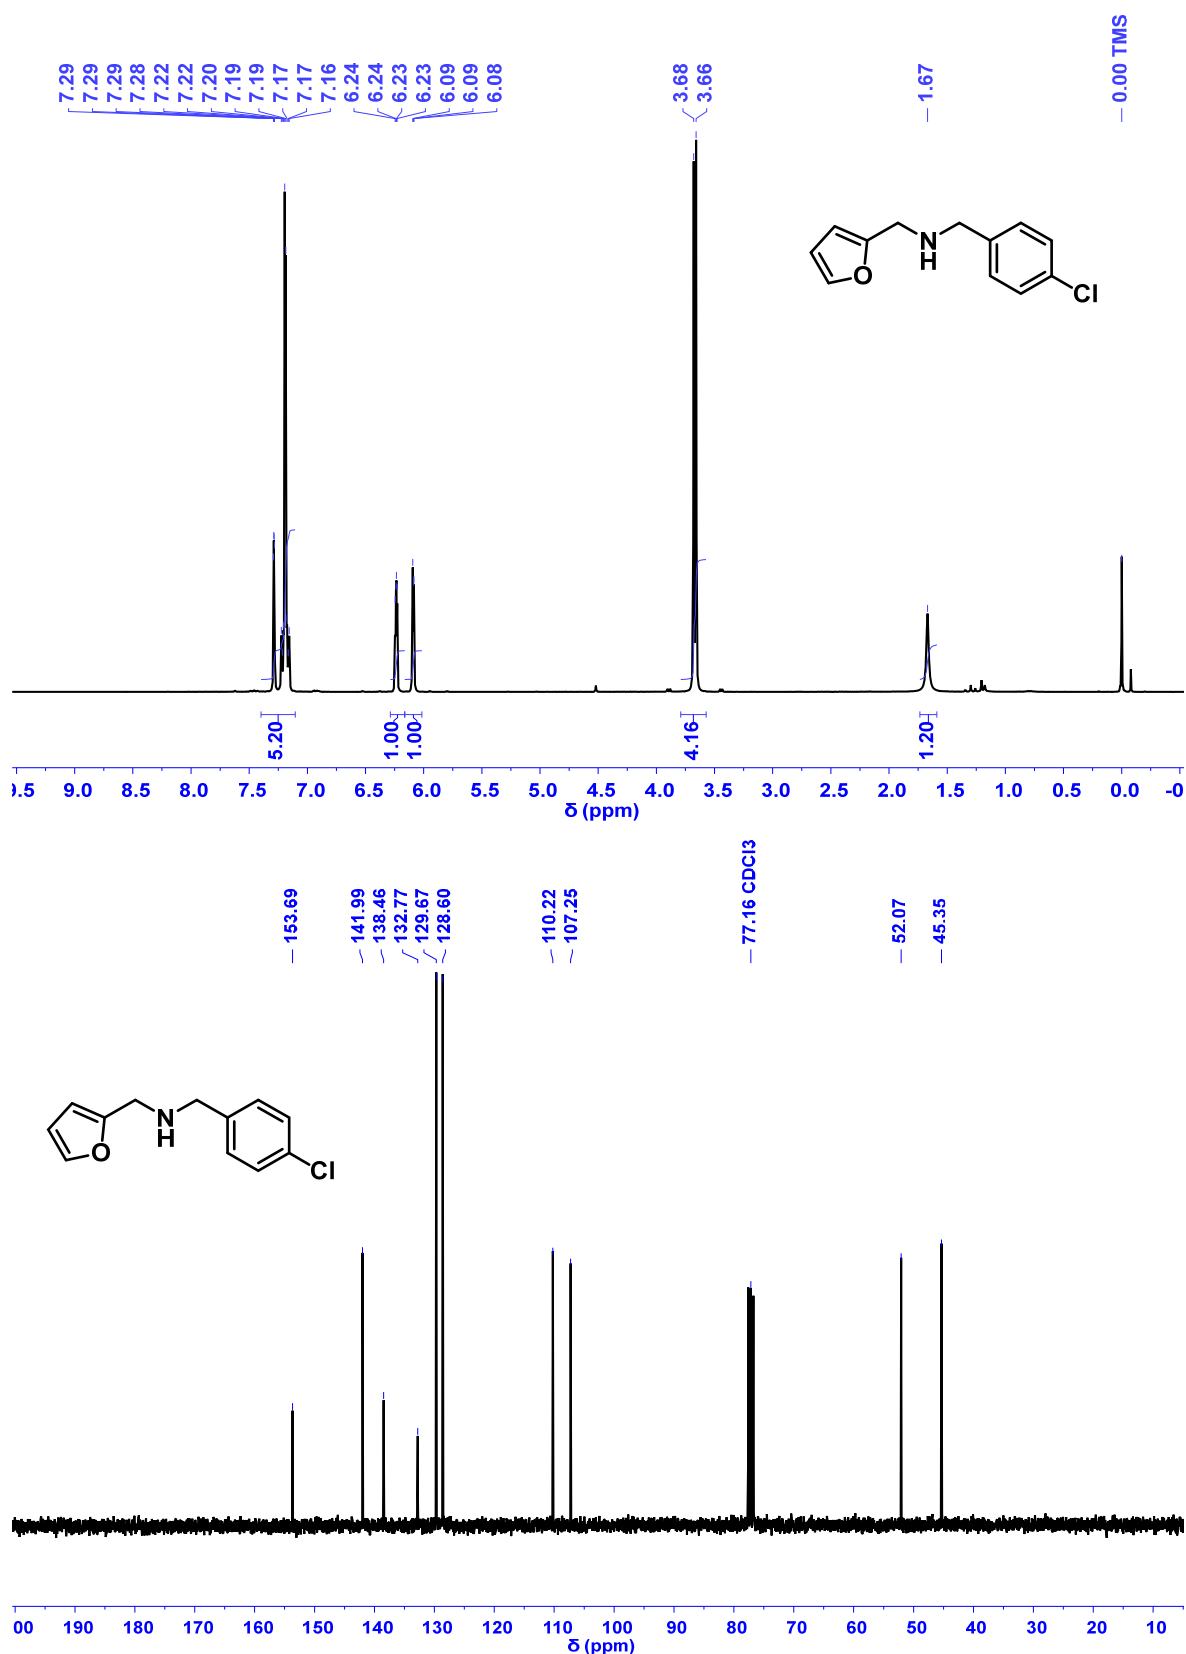

**Fig. S24** <sup>1</sup>H and <sup>13</sup>C {<sup>1</sup>H} NMR of *N*-[(4-chlorophenyl)methyl]-2-furanmethanamine **5t**. <sup>1</sup>H NMR (300 MHz, CDCl<sub>3</sub>) δ = 7.40 – 7.10 (m, 5H), 6.24 (dd, *J* = 3.1, 1.9 Hz, 1H), 6.16 – 6.02 (m, 1H), 3.67 (d, *J* = 6.1 Hz, 4H), 1.67 (s, 1H). <sup>13</sup>C {<sup>1</sup>H} NMR (75 MHz, CDCl<sub>3</sub>) δ = 153.69, 141.99, 138.46, 132.77, 129.67, 128.60, 110.22, 107.25, 52.07, 45.35.

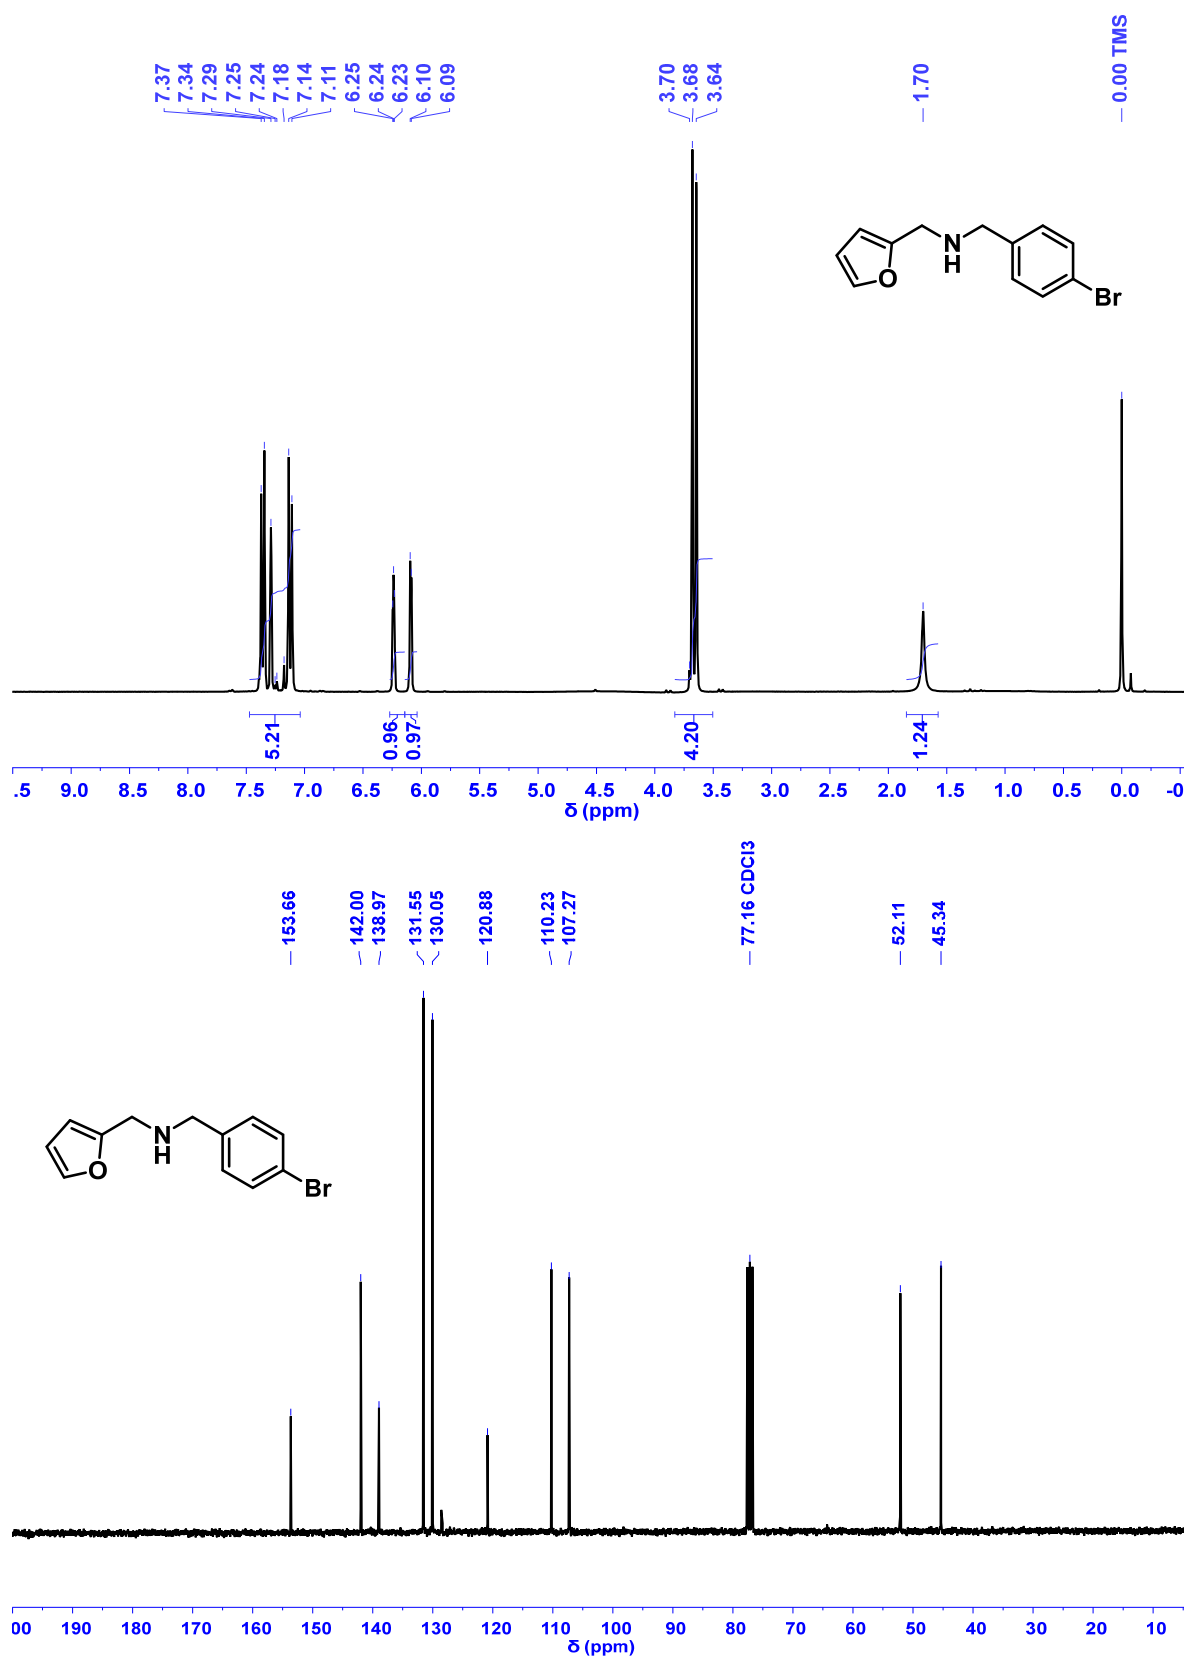

**Fig. S25**  $^1\text{H}$  and  $^{13}\text{C}$   $\{^1\text{H}\}$  NMR of *N*-[4-bromophenyl)methyl]-2-furanmethanamine **5u**.  $^1\text{H}$  NMR (300 MHz,  $\text{CDCl}_3$ )  $\delta$  7.47 – 7.04 (m, 5H), 6.27 – 6.14 (m, 1H), 6.09 (d,  $J$  = 3.1 Hz, 1H), 3.66 (d,  $J$  = 10.1 Hz, 4H), 1.70 (s, 1H).  $^{13}\text{C}$   $\{^1\text{H}\}$  (75 MHz,  $\text{CDCl}_3$ )  $\delta$  153.66, 142.00, 138.97, 131.55, 130.05, 120.88, 110.23, 107.27, 52.11, 45.34.



### S3. References

1 R. S. Crees, M. L. Cole, L. R. Hanton and C. J. Sumbly, *Inorg. Chem.*, 2010, **49**, 1712–1719.
